# Supplementary material
Source: PubMed Central journal article supplement (PMC7098794)
Supplement: jciinsight-5-130651-s230.pdf [file jciinsight-5-130651-s230.pdf]

**Materials table I: Antibodies used for immunohistochemistry and immunofluorescence.**

| <b>Antibody</b> | <b>Clone</b> | <b>Reference</b> | <b>Supplier</b>        | <b>Host</b> |
|-----------------|--------------|------------------|------------------------|-------------|
| SMA             | pAb          | ab124964         | Abcam                  | rabbit      |
| CD3             | SP7          | RM-9107-S        | Thermo                 | rabbit      |
| Iba1            | pAb          | 019-19741        | Wako                   | rabbit      |
| F4-80           | D2S9R        | 70076            | Cell Signaling         | rabbit      |
| FoxP3           | 1054C        | MAB8214          | RD systems             | rabbit      |
| CD3             | LN10         | NCL-L-CD3-565    | Novocastra             | mouse       |
| CD68            | PG-M1        | M0876            | Agilent (ehemals Dako) | mouse       |
| FoxP3           | SP97         | ab99963          | Abcam                  | rabbit      |

**Materials Table II: TaqMan probes**

| <b>TaqMan Gene Expression Assay 20X</b> | <b>Gene</b>                                | <b>Catalogue Number</b> |
|-----------------------------------------|--------------------------------------------|-------------------------|
| GAPDH                                   | housekeeping                               | Mm99999915_g1           |
| TBP (TATA-box binding protein)          | housekeeping                               | Mm00446971_m1           |
| KIM-1 (HAVCR1)                          | Kidney injury marker                       | Mm00506686_m1           |
| NGAL (LCN2)                             | Neutrophil gelatinase-associated lipocalin | Mm001324470_m1          |
| IL-1 beta                               | interleukin- 1 beta                        | Mm00434228_m1           |
| VIM                                     | vimentin                                   | Mm01333430_m1           |
| TNC                                     | tenascin C                                 | Mm00495662_m1           |
| TGF-beta 1                              | transforming growth factor beta 1          | Mm01178820_m1           |
| COL1A1                                  | collagen type I alpha 1                    | Mm00801666_g1           |
| FN1                                     | fibronectin 1                              | Mm01256735_m1           |
| Osteopontin = SPP1                      | secreted phosphoprotein 1                  | Mm00436767_m1           |

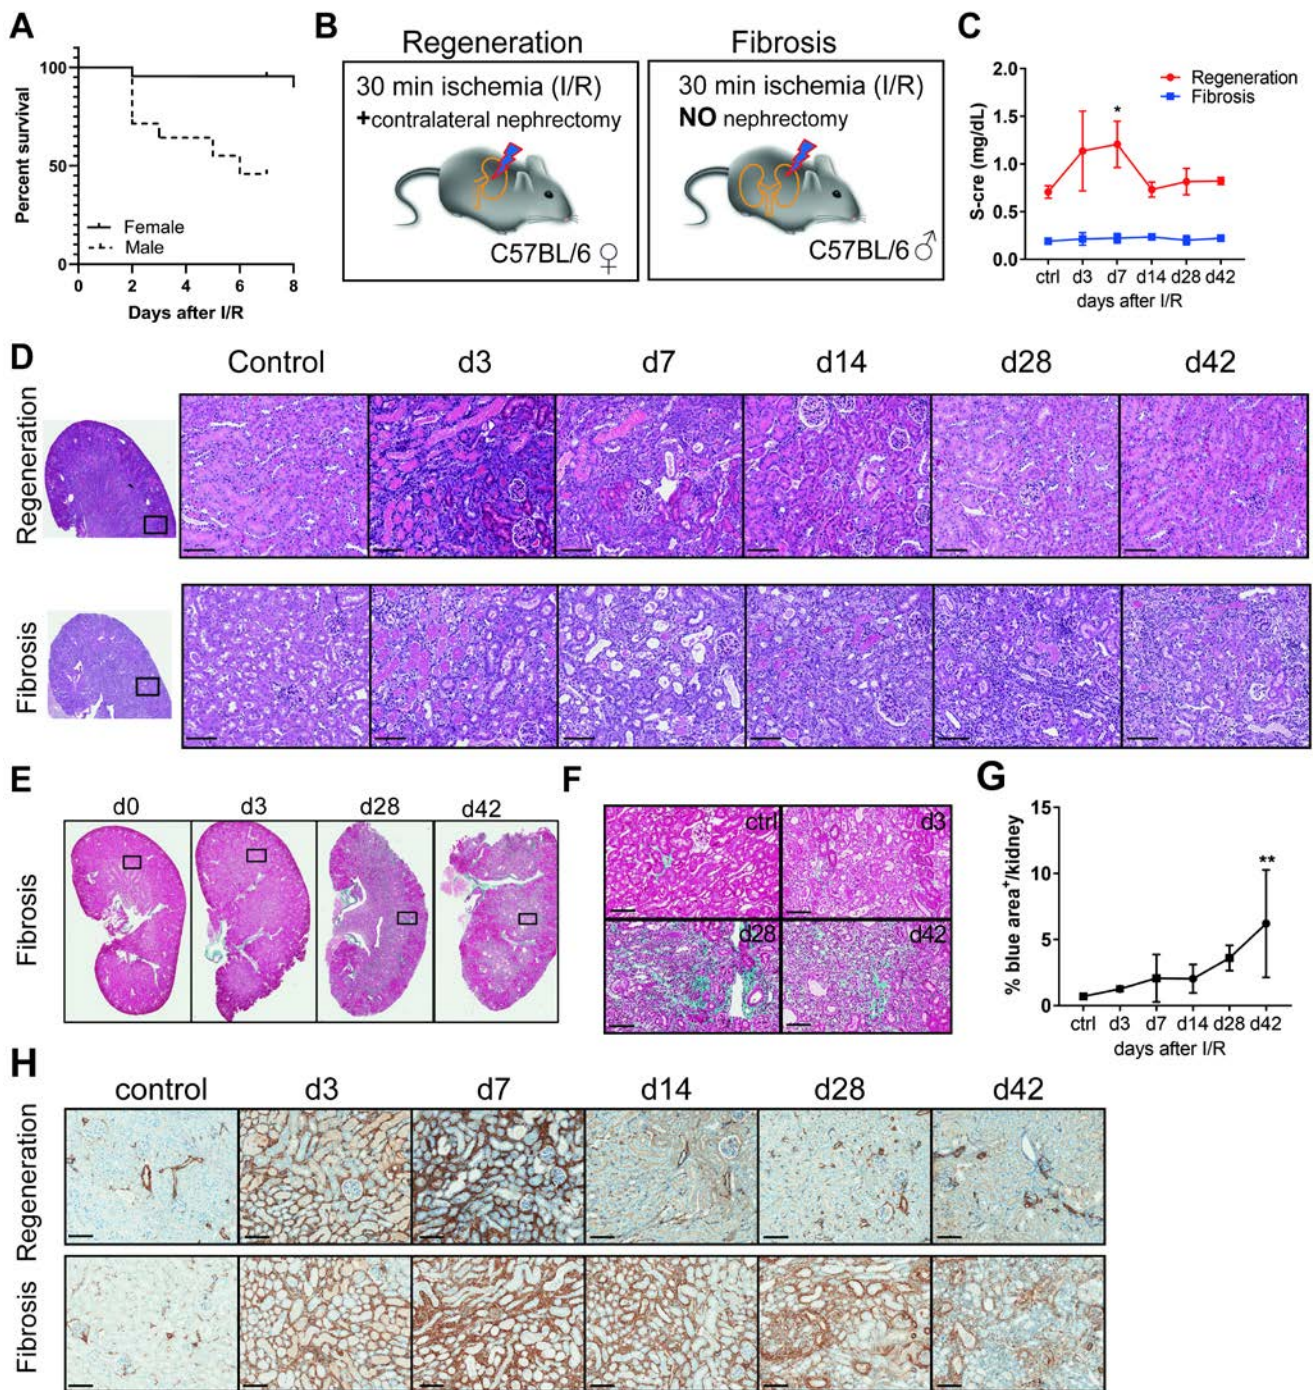

**Supplemental Figure 1: Characterization of two ischemia reperfusion Kidney injury (I/R) models to study regeneration and fibrosis.** (A) Kaplan-meier survival curve of males and females subjected to 30 min I/R injury with contralateral nephrectomy (Regeneration model). (B) Schematic representation of the surgical protocol for fibrosis (left) and regeneration (right). (C) Serum creatinine (S-cre) measurements at indicated time points after injury, for fibrosis (blue) and regeneration (red) models. (D) Representative images of H&E staining in Regeneration (top) and Fibrosis (bottom) at indicated time points after injury, compared to sex-matched naive or sham control mice. Pictures at a higher magnification are taken from the cortico-medullary junction areas indicated on the squares from kidney images on the left. (E) Gomori's Trichrome staining in kidneys from fibrosis model, at indicated time points. (F) Higher magnification of zones in squares from D, showing collagen fiber deposition, in blue. (G) Gomori's Trichrome positive blue area morphometric quantification for indicated time points, referring to images in E and F. (H) Representative smooth muscle actin (SMA) staining on kidney sections at indicated time points, from Regeneration (top panels) and Fibrosis (bottom). Scale bars: 100  $\mu$ m. Results are representative of (A) two (males, n=14) or three (females, n=22) independent experiments and (C-H) one (regeneration model) or two (fibrosis model) independent experiments, with 3-5 mice per time point/condition. Mean  $\pm$  SEM. \* $p < 0.05$ , \*\* $p < 0.01$ , compared with controls by 2-way ANOVA followed by Dunnett's post hoc test for multiple comparisons (C) or one-way ANOVA with Turkey's multiple comparisons test (G).

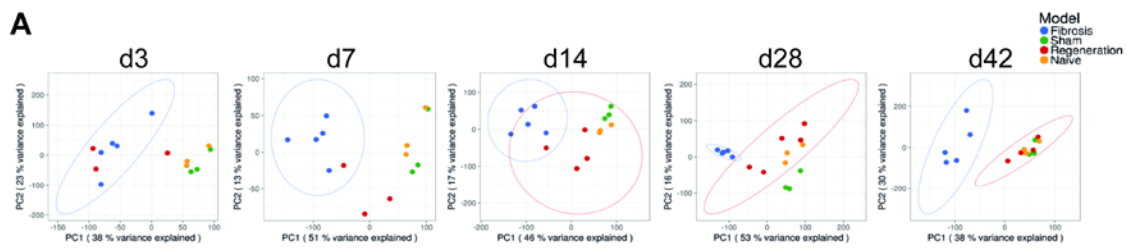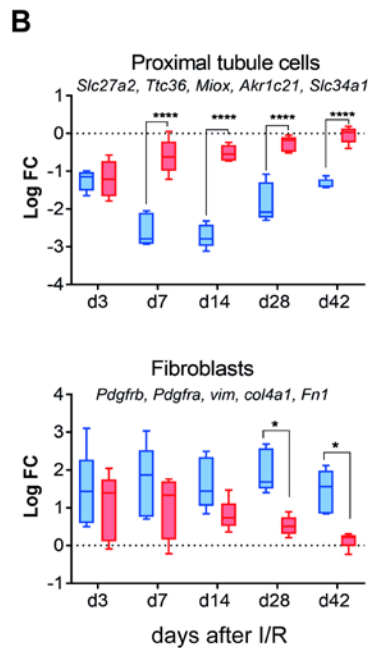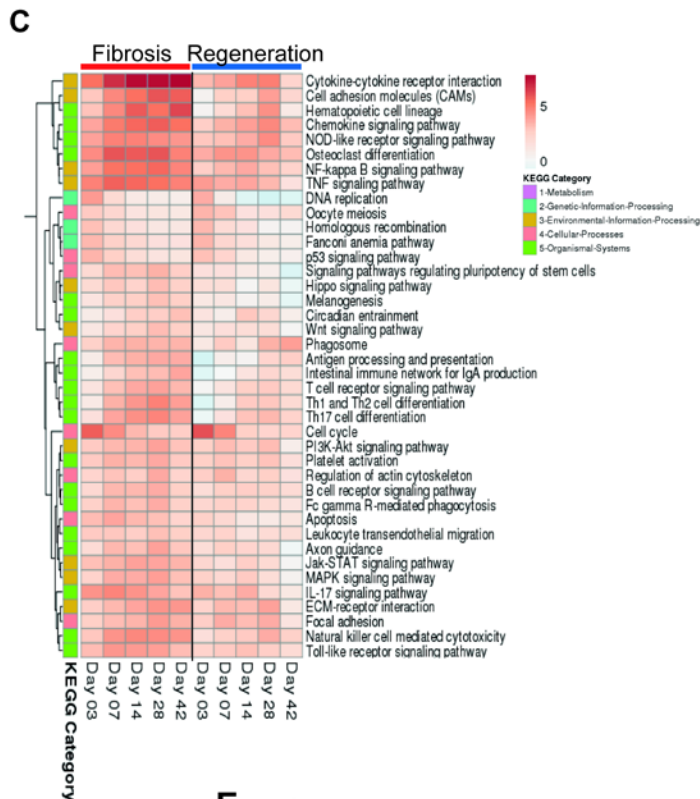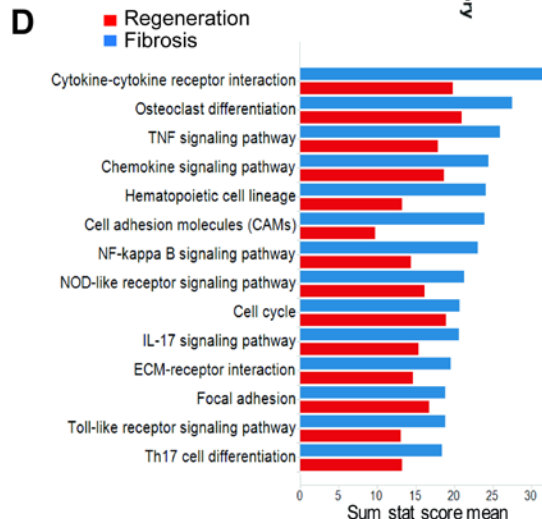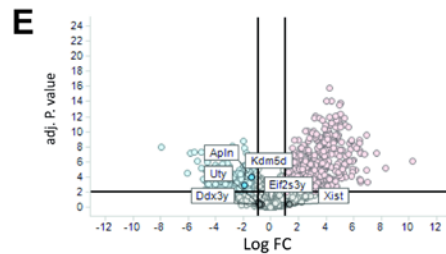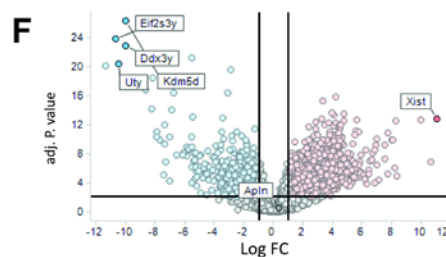

**Supplemental Figure 2: Bulk RNA-seq analysis on kidney regeneration and fibrosis models.** Time course RNAseq analysis after kidney injury in regeneration and fibrosis models, compared to age- and sex-matched naïve and sham control mice. **(A)** Principal Component Analysis (PCA) for the indicated time points. **(B)** Kidney cell deconvolution: Log Fold change (FC) of the indicated genes that characterize each cell type, relative to control samples. **(C)** Heatmap with hierarchical clustering showing the up-regulated KEGG pathways (categories 1-5). **(D)** Enrichment analysis of KEGG pathways on DE genes from C. Selected top up-regulated pathways between regeneration (red) and fibrosis (blue), from all time points, ranked by p-value. **(E and F)** Volcano plots showing the fold change (FC) versus p value of DE genes from the comparison between **(E)** sex-matched versus non-sex matched controls **(F)**. Sex related genes (e.g. X inactive specific transcript, Xist) are not differentially expressed in E.



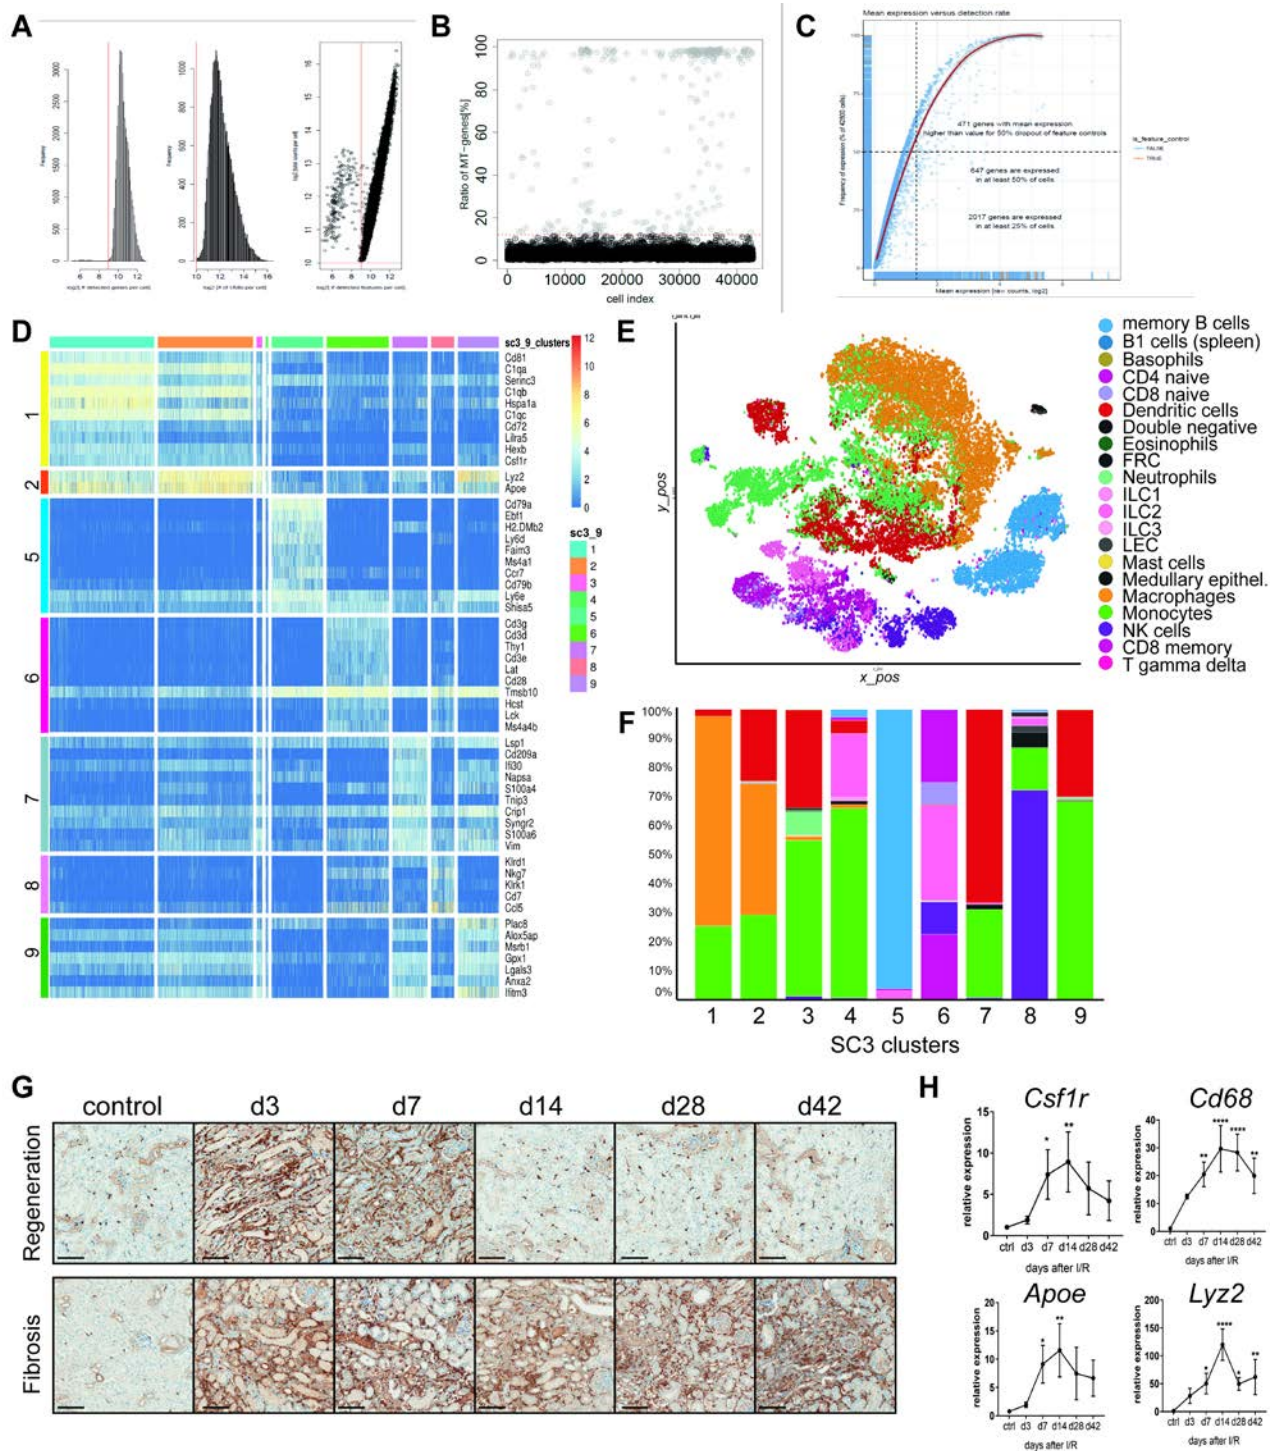

**Supplemental Figure 3: Single cell RNA-seq reveals accumulation of macrophages and T cells after kidney injury.** (A-C) Representative plots of the quality control steps, used to filter out poor quality cells for downstream analysis. (D) SC3 derived marker genes for each cell cluster and respective cell type assignment in A. Clusters 3 and 4 had too few cells and no marker genes could be identified, therefore could not be assigned to a known cell type. (E) Same T-SNE as in figure 2A, showing the overlay of Immgen immune cell types. Over 20 immune cell types could be identified. Related cell types were colored similarly. (F) Frequencies of each Immgen cell type within each of the 9 SC3 identified clusters from Figure 2A. (G) Representative images of Iba1 staining in regeneration (top) and fibrosis (bottom) at indicated time points after injury, compared to control mice. (H) qPCR validation on whole kidney extracts from fibrosis samples, for the selected macrophage genes, shown as fold change relative to control samples. Scale bars: 100  $\mu$ m. Results are representative of one (regeneration model) or two (fibrosis model) independent experiments, with 3-5 mice per time point/condition. Mean  $\pm$  SEM. \* $p < 0.05$ , \*\* $p < 0.01$ , \*\*\*\* $p < 0.0001$  compared with controls by one-way ANOVA followed by Dunnett's post hoc test for multiple comparisons (H).

**A**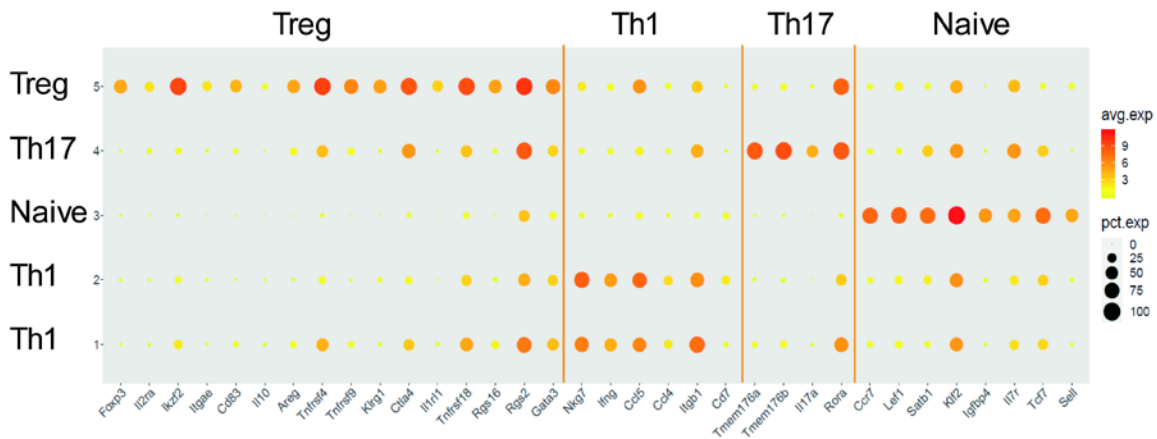**B**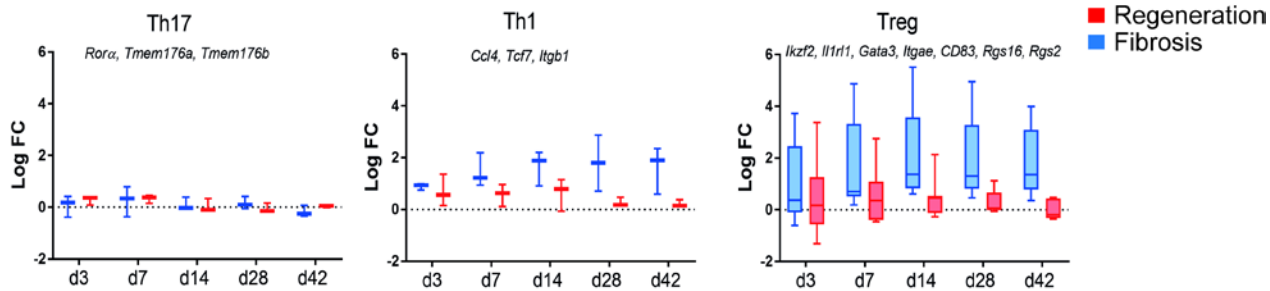

**Supplemental Figure 4: CD4<sup>+</sup> T cell marker genes expression and deconvolution analysis. (A)** Seurat-derived dot plot showing the average (colors) and percentage (size) of expression of the indicated marker genes for the 5 clusters, relative to Figure 3A. **(B)** Immune cell deconvolution analysis using signature genes from A, in whole kidney bulk RNAseq (relative to Figure 1C), showing the Log FC of the indicated genes that characterize each cell type, relative to control samples for regeneration (red) and fibrosis (blue).

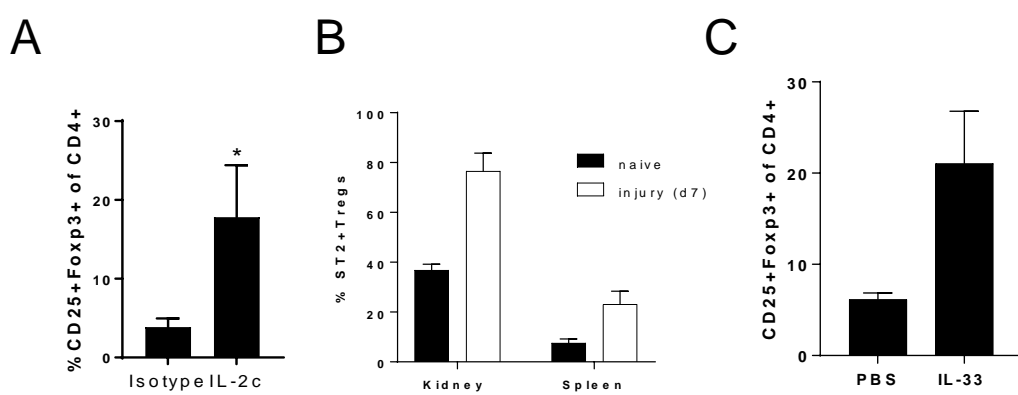

**Supplemental Figure 5: IL-2c and IL-33 expand kidney Tregs in vivo. (A)** Frequency of Tregs (CD25<sup>+</sup>Foxp3<sup>+</sup> of CD4<sup>+</sup>) in kidneys from mice treated with a mixture of IL2-IL2mab (IL2c) or isotype control, 3x/week for one week. Samples were harvested and analyzed 7 days after initial treatment. **(B)** Frequency of ST2<sup>+</sup> Tregs in kidney and spleen from naive and 7 days after kidney injury. **(C)** Frequency of Tregs in kidneys from mice treated with IL-33 or PBS, 3x/week for one week. Samples were harvested and analyzed 7 days after initial treatment. Results are representative of at least two independent experiments, with 3-5 mice per group. Mean  $\pm$  SEM. \* $p < 0.05$ , by two-tailed Student's *t*-Test.

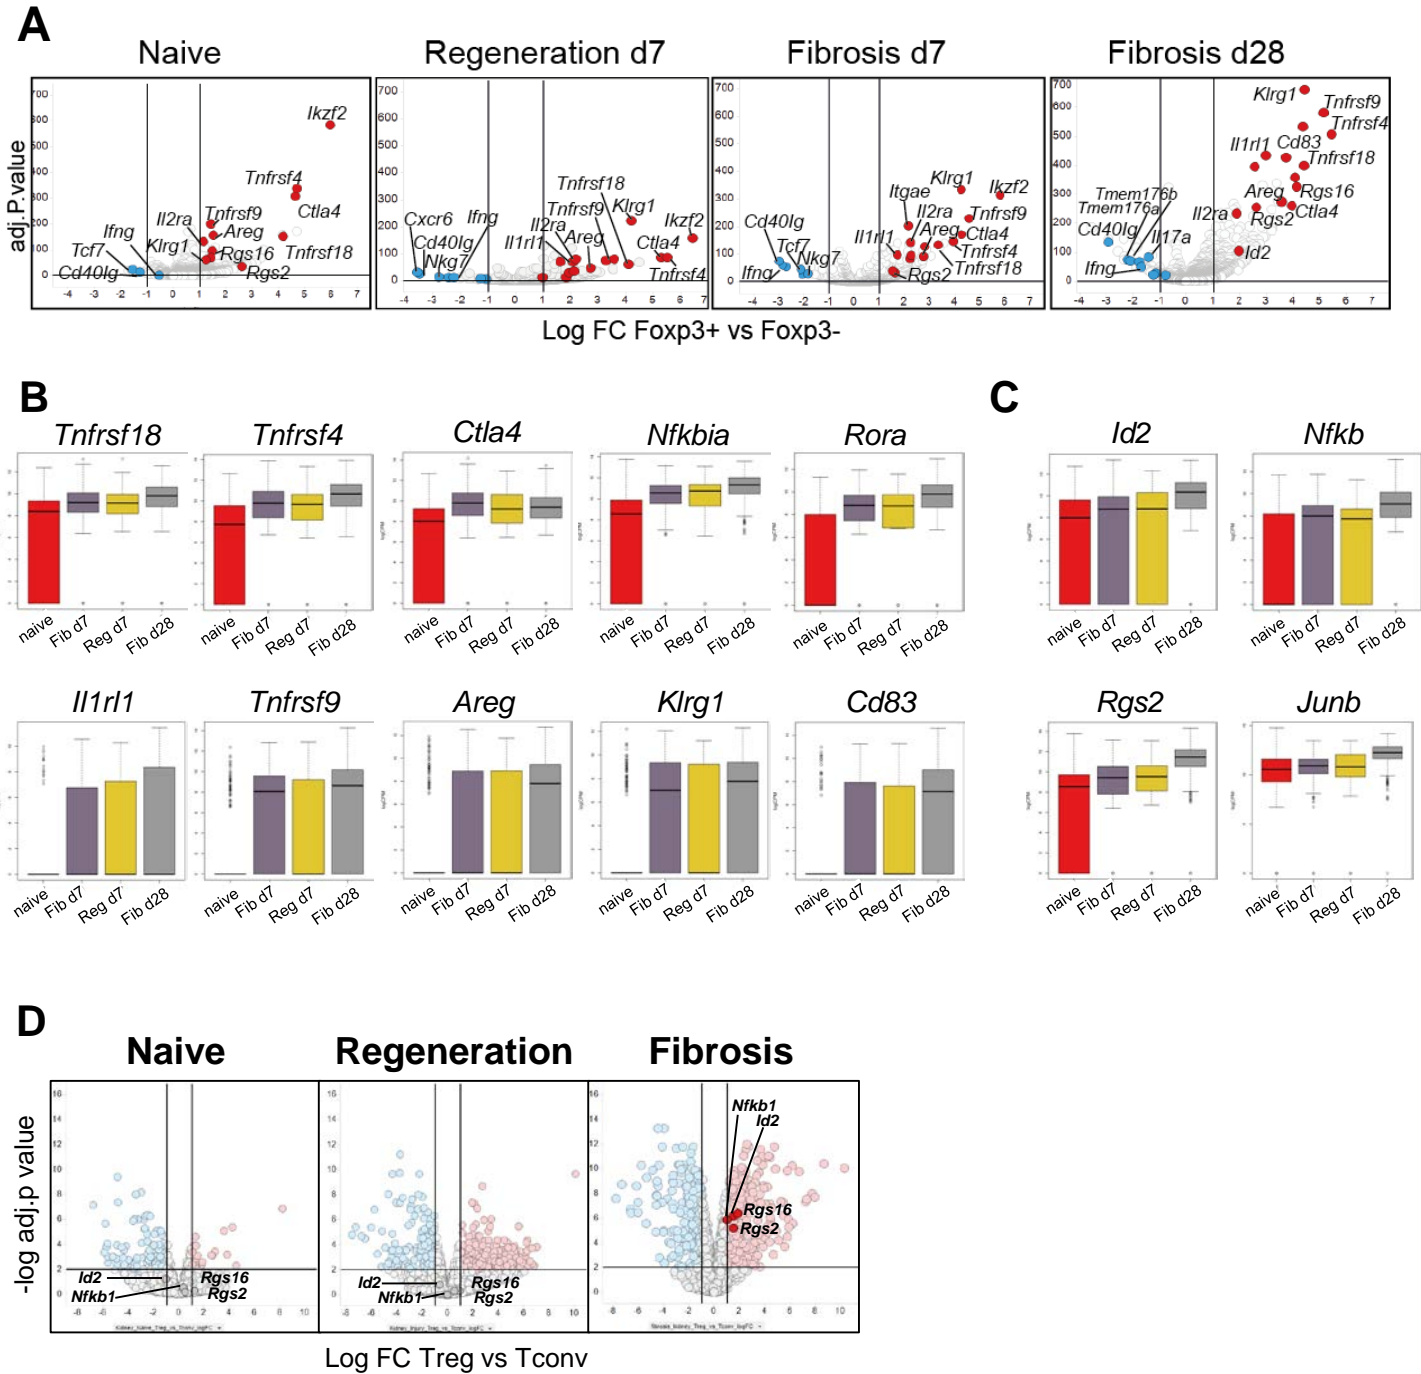

**Supplemental Figure 6: Kidney single cell and bulk RNA-seq derived Treg signatures. (A)** Volcano plots showing the Log FC vs p-value for DE genes between Foxp3+ vs Foxp3- cells, for indicated conditions, extracted from single cell RNA-seq analysis (relative to Figure 3A). Highlighted are Treg signature genes (red) and T conventional marker genes (blue). **(B-C)** DE gene analysis comparing Foxp3+ Tregs between naive, regeneration and fibrosis. **(B)** Selected genes that had higher expression in Foxp3+ Tregs after kidney injury versus naive Tregs or **(C)** in Tregs from Fibrosis d28 versus all other Tregs. **(D)** Same volcano plots as in Figure 5B, highlighting the four transcription factors from C which were differentially expressed in Tregs during fibrosis.



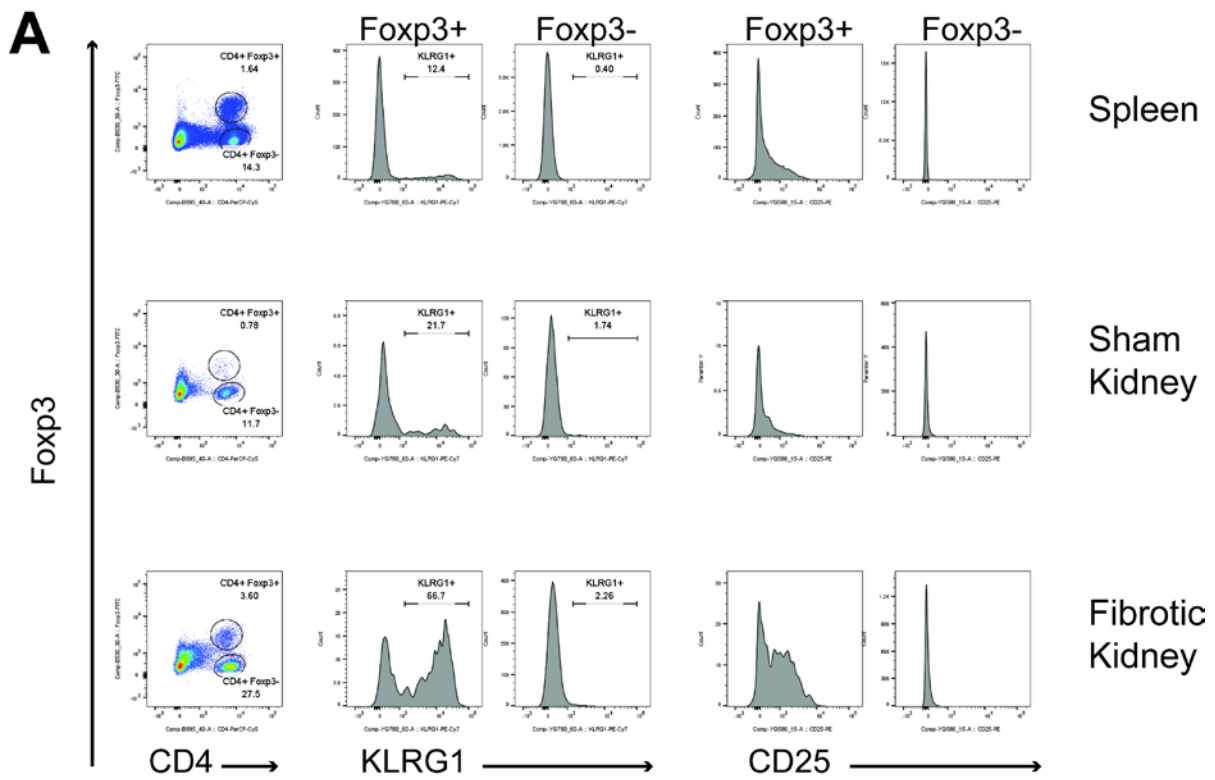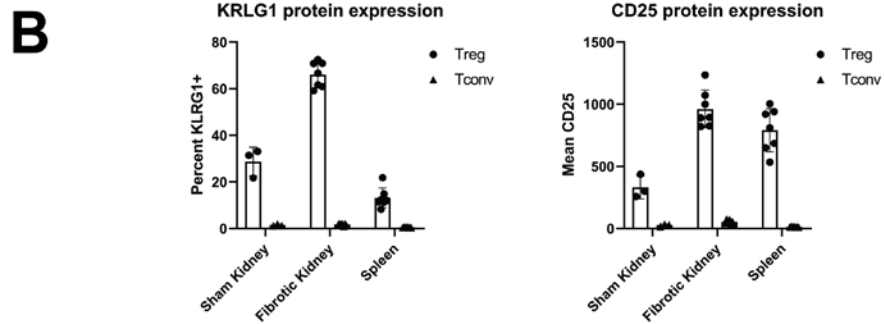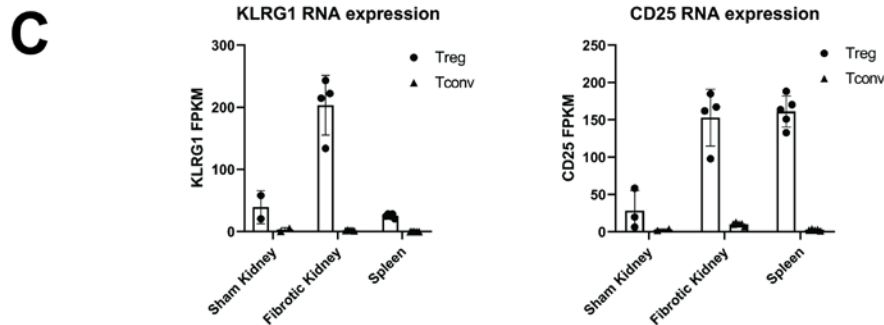

**Supplemental Figure 7: Expression of activation markers in Treg and Tconv in kidney and spleen after injury.** Male mice were subjected to IRI, fibrosis model. CD45<sup>+</sup> immune cells were isolated from kidney and spleen 28 days after injury. Samples were either analyzed by flow cytometry or sorted into Fopx3-GFP<sup>+</sup> Treg or Fopx3-GFP<sup>-</sup> Tconv for bulk RNA-seq analysis (relative to Figure 5). **(A)** Representative FACS plots showing the expression of KLRG1 and CD25 on Treg and Tconv from kidney and spleen **(B)** and quantification. **(C)** RNAseq average expression values (FPKM, fragments per kilobase of exon model per million reads mapped) of KLRG1 and CD25 on sorted Treg and T conv cells, at the indicated conditions. Results are representative of 2 independent experiments with 3-5 mice per group.

**Supplemental Table I: SC3-based cluster-specific CD45+ marker genes list**

| gene_id            | symbol   | auroc    | clusts |
|--------------------|----------|----------|--------|
| ENSMUSG00000037706 | Cd81     | 0.940224 | 1      |
| ENSMUSG00000036887 | C1qa     | 0.914691 | 1      |
| ENSMUSG00000036905 | C1qb     | 0.910791 | 1      |
| ENSMUSG00000091971 | Hspa1a   | 0.90868  | 1      |
| ENSMUSG00000017707 | Serinc3  | 0.908373 | 1      |
| ENSMUSG00000024610 | Cd74     | 0.902676 | 1      |
| ENSMUSG00000036896 | C1qc     | 0.898089 | 1      |
| ENSMUSG00000060586 | H2-Eb1   | 0.895397 | 1      |
| ENSMUSG00000070873 | Lilra5   | 0.888064 | 1      |
| ENSMUSG00000028459 | Cd72     | 0.88311  | 1      |
| ENSMUSG00000073421 | H2-Ab1   | 0.882334 | 1      |
| ENSMUSG00000036594 | H2-Aa    | 0.868326 | 1      |
| ENSMUSG00000021665 | Hexb     | 0.864316 | 1      |
| ENSMUSG00000021998 | Lcp1     | 0.850766 | 1      |
| ENSMUSG00000052684 | Jun      | 0.850747 | 1      |
| ENSMUSG00000024621 | Csf1r    | 0.850342 | 1      |
| ENSMUSG00000029810 | Tmem176b | 0.845657 | 1      |
| ENSMUSG00000018930 | Ccl4     | 0.840913 | 1      |
| ENSMUSG00000004730 | Emr1     | 0.837925 | 1      |
| ENSMUSG00000027447 | Cst3     | 0.836036 | 1      |
| ENSMUSG00000000982 | Ccl3     | 0.830252 | 1      |
| ENSMUSG00000030560 | Ctsc     | 0.827289 | 1      |
| ENSMUSG00000059089 | Fcgr4    | 0.826487 | 1      |
| ENSMUSG00000015340 | Cybb     | 0.822823 | 1      |
| ENSMUSG00000051439 | Cd14     | 0.822449 | 1      |
| ENSMUSG00000018920 | Cxcl16   | 0.81724  | 1      |
| ENSMUSG00000008348 | Ubc      | 0.810275 | 1      |
| ENSMUSG00000038642 | Ctss     | 0.810192 | 1      |
| ENSMUSG00000000078 | Klf6     | 0.806641 | 1      |
| ENSMUSG00000064373 | Sepp1    | 0.80218  | 1      |
| ENSMUSG00000021250 | Fos      | 0.800564 | 1      |
| ENSMUSG00000018774 | Cd68     | 0.799545 | 1      |
| ENSMUSG00000022108 | Itm2b    | 0.797237 | 1      |
| ENSMUSG00000050578 | Mmp13    | 0.796364 | 1      |
| ENSMUSG00000021190 | Lgmn     | 0.795086 | 1      |
| ENSMUSG00000074622 | Mafb     | 0.790289 | 1      |
| ENSMUSG00000060802 | B2m      | 0.788637 | 1      |
| ENSMUSG00000024190 | Dusp1    | 0.783209 | 1      |
| ENSMUSG00000021270 | Hsp90aa1 | 0.778144 | 1      |
| ENSMUSG00000024397 | Aif1     | 0.771847 | 1      |
| ENSMUSG00000031613 | Hpgd     | 0.7713   | 1      |
| ENSMUSG00000023367 | Tmem176a | 0.76684  | 1      |
| ENSMUSG00000062593 | Lilrb4   | 0.765798 | 1      |
| ENSMUSG00000058715 | Fcer1g   | 0.765175 | 1      |
| ENSMUSG00000079547 | H2-DMb1  | 0.764776 | 1      |
| ENSMUSG00000032554 | Trf      | 0.758242 | 1      |
| ENSMUSG00000026864 | Hspa5    | 0.757175 | 1      |
| ENSMUSG00000026628 | Atf3     | 0.749842 | 1      |
| ENSMUSG00000040950 | Mgl2     | 0.743985 | 1      |
| ENSMUSG00000016256 | Ctsz     | 0.741422 | 1      |
| ENSMUSG00000090877 | Hspa1b   | 0.740319 | 1      |
| ENSMUSG00000056708 | Ier5     | 0.735935 | 1      |
| ENSMUSG00000038393 | Txnip    | 0.723098 | 1      |
| ENSMUSG00000026358 | Rgs1     | 0.723091 | 1      |
| ENSMUSG00000049130 | C5ar1    | 0.722558 | 1      |
| ENSMUSG00000026360 | Rgs2     | 0.717025 | 1      |
| ENSMUSG00000045763 | Basp1    | 0.714934 | 1      |

|                    |          |          |   |
|--------------------|----------|----------|---|
| ENSMUSG00000054364 | Rhob     | 0.713016 | 1 |
| ENSMUSG00000015656 | Hspa8    | 0.700149 | 1 |
| ENSMUSG00000039910 | Cited2   | 0.69983  | 1 |
| ENSMUSG00000024401 | Tnf      | 0.697749 | 1 |
| ENSMUSG00000019505 | Ubb      | 0.697121 | 1 |
| ENSMUSG00000049723 | Mmp12    | 0.695597 | 1 |
| ENSMUSG00000020423 | Btg2     | 0.693607 | 1 |
| ENSMUSG00000035356 | Nfkbiz   | 0.686381 | 1 |
| ENSMUSG00000021453 | Gadd45g  | 0.685821 | 1 |
| ENSMUSG00000044786 | Zfp36    | 0.682074 | 1 |
| ENSMUSG00000038418 | Egr1     | 0.669834 | 1 |
| ENSMUSG00000073411 | H2-D1    | 0.665534 | 1 |
| ENSMUSG00000050370 | Ch25h    | 0.665245 | 1 |
| ENSMUSG00000023944 | Hsp90ab1 | 0.654105 | 1 |
| ENSMUSG00000005483 | Dnajb1   | 0.652751 | 1 |
| ENSMUSG00000092274 | Neat1    | 0.637574 | 1 |
| ENSMUSG00000033450 | Tagap    | 0.63725  | 1 |
| ENSMUSG00000097423 | Gm26522  | 0.631881 | 1 |
| ENSMUSG00000002944 | Cd36     | 0.628318 | 1 |
| ENSMUSG00000034723 | Tmx4     | 0.625356 | 1 |
| ENSMUSG00000026365 | Cfh      | 0.611981 | 1 |
| ENSMUSG00000040829 | Zmynd15  | 0.603307 | 1 |
| ENSMUSG00000034855 | Cxcl10   | 0.590088 | 1 |
| ENSMUSG00000045932 | Ifit2    | 0.574823 | 1 |
| ENSMUSG00000004951 | Hspb1    | 0.550521 | 1 |
| ENSMUSG00000028967 | Errfi1   | 0.550181 | 1 |
| ENSMUSG00000059412 | Fxyd2    | 0.549849 | 1 |
| ENSMUSG00000048806 | Ifnb1    | 0.548925 | 1 |
| ENSMUSG00000028195 | Cyr61    | 0.538276 | 1 |
| ENSMUSG00000090698 | Apold1   | 0.506947 | 1 |
| ENSMUSG00000020651 | Slc26a4  | 0.500771 | 1 |
| ENSMUSG00000078355 | Gm13280  | 0.50028  | 1 |
| ENSMUSG00000069516 | Lyz2     | 0.862172 | 2 |
| ENSMUSG00000002985 | Apoe     | 0.847786 | 2 |
| ENSMUSG00000025351 | Cd63     | 0.796757 | 2 |
| ENSMUSG00000023992 | Trem2    | 0.796698 | 2 |
| ENSMUSG00000034708 | Grn      | 0.794098 | 2 |
| ENSMUSG00000050708 | Ftl1     | 0.793906 | 2 |
| ENSMUSG00000021939 | Ctsb     | 0.791844 | 2 |
| ENSMUSG00000024661 | Fth1     | 0.788376 | 2 |
| ENSMUSG00000031765 | Mt1      | 0.781103 | 2 |
| ENSMUSG00000015852 | Fcrls    | 0.780458 | 2 |
| ENSMUSG00000007891 | Ctsd     | 0.779635 | 2 |
| ENSMUSG00000023913 | Pla2g7   | 0.776263 | 2 |
| ENSMUSG00000023349 | Clec4n   | 0.775101 | 2 |
| ENSMUSG00000024672 | Ms4a7    | 0.771353 | 2 |
| ENSMUSG00000017754 | Pltp     | 0.770141 | 2 |
| ENSMUSG00000059498 | Fcgr3    | 0.762228 | 2 |
| ENSMUSG00000058427 | Cxcl2    | 0.761146 | 2 |
| ENSMUSG00000005054 | Cstb     | 0.761006 | 2 |
| ENSMUSG00000035385 | Ccl2     | 0.756562 | 2 |
| ENSMUSG00000026712 | Mrc1     | 0.753552 | 2 |
| ENSMUSG00000003541 | Ier3     | 0.751098 | 2 |
| ENSMUSG00000029484 | Anxa3    | 0.742737 | 2 |
| ENSMUSG00000029373 | Pf4      | 0.737598 | 2 |
| ENSMUSG00000089929 | Bcl2a1b  | 0.736586 | 2 |
| ENSMUSG00000031447 | Lamp1    | 0.732929 | 2 |
| ENSMUSG00000052336 | Cx3cr1   | 0.73014  | 2 |
| ENSMUSG00000037966 | Ninj1    | 0.722676 | 2 |

|                     |           |          |   |
|---------------------|-----------|----------|---|
| ENSMUSG00000015568  | Lpl       | 0.722279 | 2 |
| ENSMUSG00000026981  | Il1rn     | 0.719539 | 2 |
| ENSMUSG00000035373  | Ccl7      | 0.718005 | 2 |
| ENSMUSG00000048234  | Rnf149    | 0.717665 | 2 |
| ENSMUSG00000043953  | Ccl2      | 0.711318 | 2 |
| ENSMUSG00000021477  | Ctsl      | 0.699838 | 2 |
| ENSMUSG00000017466  | Timp2     | 0.698887 | 2 |
| ENSMUSG00000029304  | Spp1      | 0.697833 | 2 |
| ENSMUSG00000020053  | Igf1      | 0.697457 | 2 |
| ENSMUSG000000102037 | NA        | 0.696967 | 2 |
| ENSMUSG00000035352  | Ccl12     | 0.695268 | 2 |
| ENSMUSG00000028691  | Prdx1     | 0.676631 | 2 |
| ENSMUSG00000058755  | Osm       | 0.674333 | 2 |
| ENSMUSG00000021281  | Tnfaip2   | 0.667928 | 2 |
| ENSMUSG00000005413  | Hmox1     | 0.667556 | 2 |
| ENSMUSG00000030342  | Cd9       | 0.666045 | 2 |
| ENSMUSG00000003363  | Pld3      | 0.653092 | 2 |
| ENSMUSG00000030144  | Clec4d    | 0.648987 | 2 |
| ENSMUSG00000044080  | S100a1    | 0.642859 | 2 |
| ENSMUSG00000056054  | S100a8    | 0.641851 | 2 |
| ENSMUSG00000018102  | Hist1h2bc | 0.635479 | 2 |
| ENSMUSG00000017493  | Igfbp4    | 0.634126 | 2 |
| ENSMUSG00000009185  | Ccl8      | 0.634085 | 2 |
| ENSMUSG00000028063  | Lmna      | 0.633916 | 2 |
| ENSMUSG00000029380  | Cxcl1     | 0.633365 | 2 |
| ENSMUSG00000020048  | Hsp90b1   | 0.631589 | 2 |
| ENSMUSG00000001348  | Acp5      | 0.631479 | 2 |
| ENSMUSG00000002233  | Rhoc      | 0.630734 | 2 |
| ENSMUSG00000056071  | S100a9    | 0.626384 | 2 |
| ENSMUSG00000003545  | Fosb      | 0.621913 | 2 |
| ENSMUSG00000027848  | Olfml3    | 0.61684  | 2 |
| ENSMUSG00000025969  | Nrp2      | 0.616    | 2 |
| ENSMUSG00000020205  | Phlda1    | 0.606671 | 2 |
| ENSMUSG00000027399  | Il1a      | 0.606374 | 2 |
| ENSMUSG00000032786  | Alas1     | 0.605178 | 2 |
| ENSMUSG00000023951  | Vegfa     | 0.604732 | 2 |
| ENSMUSG00000034993  | Vat1      | 0.602518 | 2 |
| ENSMUSG00000019970  | Sgk1      | 0.602407 | 2 |
| ENSMUSG00000028832  | Stmn1     | 0.598002 | 2 |
| ENSMUSG00000021508  | Cxcl14    | 0.595361 | 2 |
| ENSMUSG00000032324  | Tspan3    | 0.592319 | 2 |
| ENSMUSG000000096210 | H1f0      | 0.589089 | 2 |
| ENSMUSG00000017009  | Sdc4      | 0.585866 | 2 |
| ENSMUSG00000027962  | Vcam1     | 0.584199 | 2 |
| ENSMUSG00000038508  | Gdf15     | 0.58295  | 2 |
| ENSMUSG00000003617  | Cp        | 0.581836 | 2 |
| ENSMUSG00000030218  | Mgp       | 0.577595 | 2 |
| ENSMUSG00000018339  | Gpx3      | 0.576184 | 2 |
| ENSMUSG00000032802  | Srxn1     | 0.57374  | 2 |
| ENSMUSG00000011179  | Odc1      | 0.573269 | 2 |
| ENSMUSG00000032366  | Tpm1      | 0.572143 | 2 |
| ENSMUSG00000024843  | Chka      | 0.571885 | 2 |
| ENSMUSG00000022415  | Syng1     | 0.569272 | 2 |
| ENSMUSG00000020377  | Ltc4s     | 0.567166 | 2 |
| ENSMUSG00000029816  | Gpnmb     | 0.560818 | 2 |
| ENSMUSG00000061100  | Retnla    | 0.554609 | 2 |
| ENSMUSG00000022303  | Dcstamp   | 0.554054 | 2 |
| ENSMUSG00000024486  | Hbegf     | 0.550748 | 2 |
| ENSMUSG00000037411  | Serpine1  | 0.548537 | 2 |



**Supplemental Table II: Naive Foxp3<sup>+</sup> vs Foxp3<sup>-</sup> LogFC vs p-value of DE genes  
extracted from single cell RNAseq data**

| gene_id  | pval      | log2fc   | adj_pval  | DE_flag |      |
|----------|-----------|----------|-----------|---------|------|
| Foxp3    |           | 0        | 8.718335  | 0       | TRUE |
| Ikzf2    | 2.94E-258 | 5.942104 | 1.62E-254 | TRUE    |      |
| Capg     | 7.00E-79  | 4.681998 | 1.10E-75  | TRUE    |      |
| Tnfrsf4  | 4.59E-151 | 4.671531 | 1.68E-147 | TRUE    |      |
| Ctla4    | 8.26E-138 | 4.626031 | 2.27E-134 | TRUE    |      |
| Tnfrsf18 | 4.33E-70  | 4.164587 | 4.33E-67  | TRUE    |      |
| Folr4    | 2.91E-72  | 4.142042 | 3.56E-69  | TRUE    |      |
| Glrx     | 2.21E-46  | 3.4026   | 1.28E-43  | TRUE    |      |
| Ifi2712a | 6.17E-33  | 3.319557 | 2.05E-30  | TRUE    |      |
| S100a6   | 7.71E-25  | 3.147447 | 1.63E-22  | TRUE    |      |
| Serinc3  | 4.41E-30  | 3.080196 | 1.28E-27  | TRUE    |      |
| S100a4   | 4.40E-25  | 3.070788 | 9.48E-23  | TRUE    |      |
| Pim1     | 2.67E-23  | 2.946272 | 5.14E-21  | TRUE    |      |
| Vim      | 7.23E-24  | 2.86268  | 1.42E-21  | TRUE    |      |
| Lgals1   | 1.44E-21  | 2.797497 | 2.33E-19  | TRUE    |      |
| Samsn1   | 1.06E-38  | 2.77241  | 5.08E-36  | TRUE    |      |
| Ifngr1   | 2.02E-20  | 2.707392 | 2.95E-18  | TRUE    |      |
| Arhgap31 | 2.09E-22  | 2.651391 | 3.70E-20  | TRUE    |      |
| Rhoh     | 6.39E-20  | 2.62031  | 9.12E-18  | TRUE    |      |
| S100a10  | 4.05E-31  | 2.619468 | 1.24E-28  | TRUE    |      |
| Nfkbia   | 9.11E-21  | 2.603056 | 1.43E-18  | TRUE    |      |
| Rgs2     | 1.80E-18  | 2.589354 | 2.37E-16  | TRUE    |      |
| Icos     | 3.71E-17  | 2.56602  | 4.25E-15  | TRUE    |      |
| S100a11  | 4.15E-18  | 2.53602  | 5.30E-16  | TRUE    |      |
| Maf      | 1.07E-20  | 2.518282 | 1.66E-18  | TRUE    |      |
| Cd2      | 5.98E-22  | 2.505785 | 9.95E-20  | TRUE    |      |
| Cd5      | 7.70E-17  | 2.498967 | 8.30E-15  | TRUE    |      |
| Traf1    | 9.72E-26  | 2.485186 | 2.22E-23  | TRUE    |      |
| Ptprcap  | 3.72E-23  | 2.441707 | 7.05E-21  | TRUE    |      |
| Samhd1   | 2.05E-17  | 2.402577 | 2.43E-15  | TRUE    |      |
| Itgb7    | 3.57E-14  | 2.399637 | 2.71E-12  | TRUE    |      |
| Zfp36l1  | 8.53E-15  | 2.392838 | 7.16E-13  | TRUE    |      |
| Pglyrp1  | 2.74E-40  | 2.362364 | 1.37E-37  | TRUE    |      |
| AW112010 | 8.98E-16  | 2.342578 | 8.51E-14  | TRUE    |      |
| Ly6e     | 3.81E-27  | 2.342533 | 9.09E-25  | TRUE    |      |
| Cmtm7    | 1.71E-20  | 2.309911 | 2.54E-18  | TRUE    |      |
| H2afz    | 2.24E-13  | 2.280494 | 1.50E-11  | TRUE    |      |
| Eva1b    | 4.63E-35  | 2.274948 | 1.70E-32  | TRUE    |      |
| Cyb5     | 9.43E-17  | 2.158369 | 1.01E-14  | TRUE    |      |
| Ass1     | 2.08E-14  | 2.145503 | 1.67E-12  | TRUE    |      |
| Hif1a    | 3.09E-20  | 2.098405 | 4.47E-18  | TRUE    |      |
| Sdf4     | 2.14E-12  | 2.0819   | 1.22E-10  | TRUE    |      |
| Prr13    | 1.98E-11  | 2.065531 | 9.37E-10  | TRUE    |      |
| Lbh      | 1.22E-10  | 2.06117  | 4.99E-09  | TRUE    |      |
| Sla      | 5.25E-14  | 2.046725 | 3.84E-12  | TRUE    |      |
| Fkbp1a   | 1.45E-09  | 2.038834 | 4.70E-08  | TRUE    |      |
| Rnaset2b | 1.64E-10  | 2.018185 | 6.38E-09  | TRUE    |      |
| Gata3    | 3.04E-15  | 1.999395 | 2.65E-13  | TRUE    |      |
| Smpd3a   | 1.61E-11  | 1.995247 | 7.88E-10  | TRUE    |      |
| Rgs1     | 1.11E-06  | 1.987731 | 1.61E-05  | TRUE    |      |
| Lrp10    | 8.03E-14  | 1.97198  | 5.76E-12  | TRUE    |      |
| Gm2a     | 7.35E-20  | 1.97125  | 1.04E-17  | TRUE    |      |
| Smco4    | 3.35E-19  | 1.959878 | 4.48E-17  | TRUE    |      |
| Cd37     | 4.92E-08  | 1.958783 | 1.07E-06  | TRUE    |      |
| Cd27     | 6.13E-10  | 1.95678  | 2.12E-08  | TRUE    |      |
| Nr4a1    | 9.69E-11  | 1.942017 | 4.05E-09  | TRUE    |      |

|          |          |          |          |      |
|----------|----------|----------|----------|------|
| Rnaset2a | 1.03E-09 | 1.94092  | 3.42E-08 | TRUE |
| Pycard   | 4.29E-12 | 1.930429 | 2.35E-10 | TRUE |
| Ptp4a2   | 1.71E-08 | 1.92175  | 4.12E-07 | TRUE |
| Dusp1    | 3.76E-07 | 1.914633 | 6.20E-06 | TRUE |
| Cd48     | 4.62E-10 | 1.912171 | 1.68E-08 | TRUE |
| Ubl3     | 2.03E-12 | 1.879644 | 1.17E-10 | TRUE |
| Crem     | 3.83E-25 | 1.878723 | 8.41E-23 | TRUE |
| Gimap7   | 1.54E-10 | 1.875833 | 6.06E-09 | TRUE |
| Gnb2     | 3.22E-09 | 1.875063 | 9.52E-08 | TRUE |
| Il2rb    | 3.46E-12 | 1.859803 | 1.92E-10 | TRUE |
| Vasp     | 2.02E-08 | 1.858771 | 4.83E-07 | TRUE |
| Odc1     | 2.30E-14 | 1.851216 | 1.83E-12 | TRUE |
| Nrp1     | 5.55E-38 | 1.849578 | 2.54E-35 | TRUE |
| Itn2c    | 1.31E-11 | 1.846776 | 6.53E-10 | TRUE |
| Gpx4     | 1.02E-07 | 1.845625 | 2.03E-06 | TRUE |
| Cebpb    | 2.09E-13 | 1.84099  | 1.41E-11 | TRUE |
| Arl5a    | 1.34E-36 | 1.823618 | 5.90E-34 | TRUE |
| Clic1    | 2.43E-06 | 1.820593 | 3.12E-05 | TRUE |
| Calr     | 5.45E-08 | 1.811735 | 1.17E-06 | TRUE |
| Slc9a3r1 | 2.60E-09 | 1.797193 | 7.90E-08 | TRUE |
| Tnfrsf1b | 1.60E-22 | 1.788387 | 2.98E-20 | TRUE |
| Anp32b   | 6.40E-08 | 1.78672  | 1.35E-06 | TRUE |
| Ypel3    | 9.40E-08 | 1.783776 | 1.88E-06 | TRUE |
| Wnk1     | 9.11E-10 | 1.774642 | 3.07E-08 | TRUE |
| Srgn     | 2.05E-16 | 1.771589 | 2.10E-14 | TRUE |
| Tsc22d4  | 9.90E-08 | 1.7634   | 1.97E-06 | TRUE |
| Stat1    | 2.49E-10 | 1.760568 | 9.47E-09 | TRUE |
| Dusp5    | 2.75E-09 | 1.755923 | 8.26E-08 | TRUE |
| Emp3     | 8.72E-09 | 1.743321 | 2.29E-07 | TRUE |
| Mettl23  | 8.04E-10 | 1.743273 | 2.73E-08 | TRUE |
| Sec61b   | 1.17E-06 | 1.742511 | 1.69E-05 | TRUE |
| Zfp36    | 1.26E-09 | 1.735299 | 4.11E-08 | TRUE |
| Gm26924  | 1.29E-06 | 1.708675 | 1.83E-05 | TRUE |
| Leprotl1 | 2.27E-05 | 1.698688 | 0.000202 | TRUE |
| Lcp1     | 1.28E-06 | 1.695838 | 1.82E-05 | TRUE |
| Itpkb    | 6.26E-07 | 1.687471 | 9.72E-06 | TRUE |
| Vamp8    | 4.23E-08 | 1.685573 | 9.40E-07 | TRUE |
| Psen2    | 3.96E-22 | 1.685139 | 6.80E-20 | TRUE |
| Anxa6    | 6.51E-06 | 1.660253 | 7.08E-05 | TRUE |
| Hopx     | 6.18E-11 | 1.658362 | 2.65E-09 | TRUE |
| Ahnak    | 5.58E-09 | 1.653661 | 1.54E-07 | TRUE |
| Chmp4b   | 4.83E-07 | 1.652614 | 7.75E-06 | TRUE |
| H13      | 4.34E-10 | 1.644434 | 1.59E-08 | TRUE |
| Ube2d2a  | 1.27E-05 | 1.634461 | 0.000123 | TRUE |
| Nrip1    | 3.23E-16 | 1.619078 | 3.25E-14 | TRUE |
| Rgs10    | 2.86E-07 | 1.618247 | 5.01E-06 | TRUE |
| Scand1   | 3.20E-07 | 1.615601 | 5.50E-06 | TRUE |
| Coro1b   | 2.96E-10 | 1.615353 | 1.11E-08 | TRUE |
| Atp2b1   | 8.14E-15 | 1.611083 | 6.87E-13 | TRUE |
| Polr1d   | 1.39E-05 | 1.609765 | 0.000133 | TRUE |
| Cyba     | 5.16E-06 | 1.603423 | 5.84E-05 | TRUE |
| Selk     | 7.02E-05 | 1.602455 | 0.00052  | TRUE |
| Pkp3     | 1.57E-09 | 1.601984 | 5.04E-08 | TRUE |
| H2-T23   | 0.000103 | 1.598607 | 0.000704 | TRUE |
| Tgif1    | 5.63E-17 | 1.591256 | 6.24E-15 | TRUE |
| Coro2a   | 1.74E-35 | 1.58701  | 6.84E-33 | TRUE |
| Tspan13  | 6.19E-07 | 1.580828 | 9.63E-06 | TRUE |
| Psenen   | 5.26E-05 | 1.576841 | 0.000406 | TRUE |
| Smap1    | 3.44E-11 | 1.576359 | 1.53E-09 | TRUE |

|               |          |          |          |      |
|---------------|----------|----------|----------|------|
| Cd74          | 1.23E-51 | 1.574884 | 9.00E-49 | TRUE |
| Tpm4          | 9.25E-11 | 1.567347 | 3.89E-09 | TRUE |
| Hint1         | 6.94E-06 | 1.56477  | 7.46E-05 | TRUE |
| Rab10         | 4.18E-09 | 1.560859 | 1.18E-07 | TRUE |
| Ccdc12        | 6.41E-06 | 1.560505 | 6.99E-05 | TRUE |
| Ctla2a        | 7.60E-11 | 1.551867 | 3.22E-09 | TRUE |
| Foxo1         | 5.25E-11 | 1.551828 | 2.27E-09 | TRUE |
| Mrps16        | 1.78E-10 | 1.551459 | 6.86E-09 | TRUE |
| Edf1          | 3.79E-05 | 1.549737 | 0.00031  | TRUE |
| Uqcr11        | 6.17E-08 | 1.542848 | 1.31E-06 | TRUE |
| H2-Q6         | 1.74E-07 | 1.5425   | 3.30E-06 | TRUE |
| Ppib          | 9.79E-05 | 1.530571 | 0.000679 | TRUE |
| Nfkb1         | 3.94E-09 | 1.528065 | 1.12E-07 | TRUE |
| Ctsb          | 3.19E-07 | 1.526902 | 5.50E-06 | TRUE |
| Zfand6        | 2.29E-06 | 1.523783 | 2.97E-05 | TRUE |
| 0610009D07Rik | 2.74E-06 | 1.523376 | 3.45E-05 | TRUE |
| Areg          | 1.24E-71 | 1.519248 | 1.36E-68 | TRUE |
| AC149090.1    | 3.81E-09 | 1.514416 | 1.09E-07 | TRUE |
| Son           | 0.000658 | 1.514347 | 0.003191 | TRUE |
| Gpx1          | 2.33E-08 | 1.512874 | 5.48E-07 | TRUE |
| Ywhae         | 3.33E-07 | 1.509856 | 5.64E-06 | TRUE |
| S100a13       | 3.13E-05 | 1.507992 | 0.000265 | TRUE |
| Tspan32       | 7.66E-07 | 1.505005 | 1.16E-05 | TRUE |
| Psmid8        | 5.55E-08 | 1.498267 | 1.19E-06 | TRUE |
| Mxd4          | 2.59E-09 | 1.492574 | 7.89E-08 | TRUE |
| Klrg1         | 9.78E-45 | 1.489629 | 5.12E-42 | TRUE |
| Ppp1r12a      | 4.86E-06 | 1.48951  | 5.56E-05 | TRUE |
| Srrm2         | 0.0001   | 1.489453 | 0.000691 | TRUE |
| Dctn3         | 1.23E-09 | 1.488723 | 4.05E-08 | TRUE |
| Abracl        | 5.56E-05 | 1.484237 | 0.000427 | TRUE |
| Arf5          | 9.82E-05 | 1.483921 | 0.00068  | TRUE |
| Mrpl54        | 3.01E-11 | 1.480776 | 1.36E-09 | TRUE |
| Dek           | 7.99E-07 | 1.478051 | 1.21E-05 | TRUE |
| 2310036O22Rik | 6.42E-06 | 1.475035 | 7.00E-05 | TRUE |
| Cd82          | 0.001104 | 1.472236 | 0.004874 | TRUE |
| Gpi1          | 9.93E-05 | 1.47054  | 0.000685 | TRUE |
| Spcs2         | 0.000294 | 1.470409 | 0.001669 | TRUE |
| Hn1           | 9.33E-05 | 1.470192 | 0.000657 | TRUE |
| Fgl2          | 1.62E-09 | 1.463982 | 5.16E-08 | TRUE |
| Ube2b         | 0.000128 | 1.46361  | 0.000845 | TRUE |
| H2afv         | 3.98E-06 | 1.460643 | 4.72E-05 | TRUE |
| Rps27l        | 1.32E-10 | 1.45823  | 5.30E-09 | TRUE |
| Gng5          | 0.001803 | 1.45818  | 0.007282 | TRUE |
| Lamtor5       | 5.56E-10 | 1.455831 | 1.97E-08 | TRUE |
| Nt5c          | 7.46E-08 | 1.455431 | 1.54E-06 | TRUE |
| Cers4         | 5.32E-12 | 1.450161 | 2.80E-10 | TRUE |
| Mark2         | 1.69E-08 | 1.443526 | 4.09E-07 | TRUE |
| Arf6          | 0.00031  | 1.443341 | 0.001743 | TRUE |
| NA            | 0.000163 | 1.441525 | 0.001033 | TRUE |
| Cst3          | 2.58E-10 | 1.439852 | 9.70E-09 | TRUE |
| Tgfb1         | 2.45E-07 | 1.439098 | 4.41E-06 | TRUE |
| Iqgap1        | 4.15E-05 | 1.437823 | 0.000335 | TRUE |
| Wbp5          | 4.09E-14 | 1.437622 | 3.08E-12 | TRUE |
| Tox           | 1.09E-12 | 1.433107 | 6.62E-11 | TRUE |
| Tnfrsf9       | 1.66E-91 | 1.432979 | 3.66E-88 | TRUE |
| Dad1          | 0.006212 | 1.432537 | 0.019837 | TRUE |
| Sri           | 4.65E-05 | 1.430845 | 0.000368 | TRUE |
| M6pr          | 2.77E-07 | 1.43019  | 4.89E-06 | TRUE |
| Laptm5        | 7.66E-08 | 1.426004 | 1.57E-06 | TRUE |

|               |          |          |          |      |
|---------------|----------|----------|----------|------|
| Cd81          | 3.78E-33 | 1.422697 | 1.34E-30 | TRUE |
| Hmgb2         | 4.07E-05 | 1.421889 | 0.000329 | TRUE |
| 1110008F13Rik | 3.61E-11 | 1.420793 | 1.59E-09 | TRUE |
| Atp6v1f       | 0.000621 | 1.420765 | 0.003042 | TRUE |
| Acot7         | 9.05E-15 | 1.41027  | 7.53E-13 | TRUE |
| Sfr1          | 4.10E-08 | 1.408683 | 9.20E-07 | TRUE |
| Ndufa11       | 1.61E-08 | 1.408152 | 3.94E-07 | TRUE |
| Txndc17       | 2.01E-10 | 1.405998 | 7.65E-09 | TRUE |
| Sh2d2a        | 1.87E-05 | 1.405178 | 0.000173 | TRUE |
| Csrnp1        | 2.50E-08 | 1.400799 | 5.87E-07 | TRUE |
| Prelid1       | 2.83E-06 | 1.397762 | 3.54E-05 | TRUE |
| Mndal         | 8.09E-06 | 1.394712 | 8.48E-05 | TRUE |
| Tnfaip8       | 7.27E-07 | 1.393559 | 1.11E-05 | TRUE |
| Pomp          | 1.25E-05 | 1.393289 | 0.000122 | TRUE |
| Wdr1          | 5.20E-05 | 1.393267 | 0.000403 | TRUE |
| Crip1         | 8.41E-09 | 1.39323  | 2.23E-07 | TRUE |
| Cnp           | 5.03E-06 | 1.389117 | 5.73E-05 | TRUE |
| Nt5e          | 7.53E-36 | 1.389089 | 3.06E-33 | TRUE |
| Fis1          | 0.000149 | 1.385791 | 0.000958 | TRUE |
| Picalm        | 1.38E-14 | 1.385499 | 1.13E-12 | TRUE |
| Rap1a         | 3.97E-05 | 1.381579 | 0.000322 | TRUE |
| Sh3bgrl       | 4.80E-17 | 1.380013 | 5.38E-15 | TRUE |
| Rora          | 4.85E-09 | 1.379462 | 1.36E-07 | TRUE |
| Myo1g         | 5.16E-13 | 1.376017 | 3.35E-11 | TRUE |
| P2ry10        | 4.91E-10 | 1.374542 | 1.77E-08 | TRUE |
| Gabarap       | 0.002372 | 1.373738 | 0.009101 | TRUE |
| Shfm1         | 5.76E-05 | 1.372988 | 0.000439 | TRUE |
| Rac1          | 0.002851 | 1.370991 | 0.010627 | TRUE |
| Tbc1d10c      | 0.00014  | 1.369453 | 0.000915 | TRUE |
| Ndufa13       | 0.000236 | 1.367026 | 0.001396 | TRUE |
| Lcp2          | 2.22E-06 | 1.361405 | 2.88E-05 | TRUE |
| Nr3c1         | 8.45E-09 | 1.361034 | 2.24E-07 | TRUE |
| Glipr2        | 5.58E-12 | 1.361005 | 2.91E-10 | TRUE |
| Gm2382        | 1.06E-11 | 1.360555 | 5.32E-10 | TRUE |
| Top1          | 1.04E-05 | 1.358833 | 0.000104 | TRUE |
| Tmem258       | 0.000322 | 1.358785 | 0.001794 | TRUE |
| Akap13        | 0.000351 | 1.358568 | 0.00192  | TRUE |
| Capza1        | 6.87E-06 | 1.358218 | 7.40E-05 | TRUE |
| Cox5b         | 0.002766 | 1.357152 | 0.010359 | TRUE |
| Dynlrb1       | 0.001127 | 1.355727 | 0.004947 | TRUE |
| Chmp2a        | 1.17E-05 | 1.35299  | 0.000115 | TRUE |
| Chchd2        | 7.08E-05 | 1.352528 | 0.000523 | TRUE |
| Glipr1        | 1.73E-13 | 1.351368 | 1.19E-11 | TRUE |
| Cldn25        | 2.29E-16 | 1.346574 | 2.33E-14 | TRUE |
| Tmbim6        | 0.001993 | 1.345334 | 0.007906 | TRUE |
| Rbm38         | 6.92E-11 | 1.342762 | 2.96E-09 | TRUE |
| Cdc42se2      | 4.06E-05 | 1.342496 | 0.000328 | TRUE |
| Clk1          | 0.002689 | 1.340405 | 0.0101   | TRUE |
| Dock2         | 4.40E-05 | 1.338998 | 0.000352 | TRUE |
| Atp5d         | 0.000266 | 1.334663 | 0.00154  | TRUE |
| Cdipt         | 1.67E-08 | 1.333698 | 4.07E-07 | TRUE |
| 2700060E02Rik | 0.000264 | 1.332213 | 0.001532 | TRUE |
| Mdh2          | 0.001155 | 1.329234 | 0.005062 | TRUE |
| Sod2          | 3.27E-10 | 1.327004 | 1.22E-08 | TRUE |
| Timp2         | 1.63E-22 | 1.322857 | 2.98E-20 | TRUE |
| Slc25a4       | 3.31E-07 | 1.322445 | 5.63E-06 | TRUE |
| Gadd45b       | 5.60E-10 | 1.321951 | 1.98E-08 | TRUE |
| Agfg1         | 2.30E-13 | 1.321628 | 1.51E-11 | TRUE |
| Prkch         | 6.65E-08 | 1.32151  | 1.39E-06 | TRUE |



|               |          |          |          |      |
|---------------|----------|----------|----------|------|
| Pasma7        | 0.000599 | 1.321417 | 0.002962 | TRUE |
| Syngnr2       | 1.17E-12 | 1.317592 | 7.03E-11 | TRUE |
| Tkt           | 1.58E-08 | 1.312705 | 3.88E-07 | TRUE |
| Trib1         | 2.07E-28 | 1.311878 | 5.16E-26 | TRUE |
| Sat1          | 4.56E-05 | 1.309589 | 0.000362 | TRUE |
| Atox1         | 1.70E-05 | 1.307033 | 0.000158 | TRUE |
| Esyt1         | 1.96E-07 | 1.305712 | 3.60E-06 | TRUE |
| Rhof          | 2.98E-09 | 1.302684 | 8.83E-08 | TRUE |
| Ndufb11       | 0.000407 | 1.302422 | 0.002158 | TRUE |
| Minos1        | 0.00072  | 1.300889 | 0.00344  | TRUE |
| Reep5         | 2.31E-06 | 1.298352 | 2.99E-05 | TRUE |
| Cdk2ap2       | 0.001294 | 1.29821  | 0.005574 | TRUE |
| Gna13         | 1.57E-06 | 1.296593 | 2.16E-05 | TRUE |
| Fyb           | 0.004714 | 1.295736 | 0.01592  | TRUE |
| Ly6a          | 0.000102 | 1.295168 | 0.000702 | TRUE |
| Zdhhc20       | 4.17E-09 | 1.295076 | 1.18E-07 | TRUE |
| Snx20         | 1.04E-10 | 1.294655 | 4.35E-09 | TRUE |
| Psmb8         | 7.41E-05 | 1.285576 | 0.000543 | TRUE |
| 4632428N05Rik | 2.01E-05 | 1.285055 | 0.000183 | TRUE |
| Nap111        | 1.93E-06 | 1.284438 | 2.57E-05 | TRUE |
| Dok2          | 1.90E-06 | 1.282847 | 2.53E-05 | TRUE |
| AU020206      | 1.00E-12 | 1.280295 | 6.16E-11 | TRUE |
| Akna          | 2.60E-08 | 1.27964  | 6.05E-07 | TRUE |
| Tommm22       | 0.000918 | 1.277458 | 0.004196 | TRUE |
| Kxd1          | 1.71E-09 | 1.277419 | 5.45E-08 | TRUE |
| Cd6           | 0.000466 | 1.277374 | 0.002415 | TRUE |
| Gnai2         | 4.56E-06 | 1.272331 | 5.27E-05 | TRUE |
| Rheb          | 6.45E-07 | 1.271663 | 9.95E-06 | TRUE |
| Rilpl2        | 4.07E-15 | 1.270351 | 3.52E-13 | TRUE |
| Bax           | 6.54E-05 | 1.26839  | 0.00049  | TRUE |
| Ppp1r16b      | 1.37E-06 | 1.267472 | 1.92E-05 | TRUE |
| Snx3          | 0.00042  | 1.266256 | 0.002211 | TRUE |
| Psme1         | 0.01255  | 1.265869 | 0.034858 | TRUE |
| Pdcd6         | 1.61E-07 | 1.264724 | 3.07E-06 | TRUE |
| Rinl          | 0.001364 | 1.261457 | 0.005803 | TRUE |
| Ndufs6        | 8.33E-06 | 1.259299 | 8.68E-05 | TRUE |
| Atf7ip        | 7.64E-10 | 1.258879 | 2.60E-08 | TRUE |
| Zdhhc18       | 9.18E-10 | 1.258176 | 3.07E-08 | TRUE |
| Pdia3         | 0.002296 | 1.257931 | 0.008873 | TRUE |
| Hcls1         | 9.83E-05 | 1.254166 | 0.00068  | TRUE |
| Uqcrq         | 0.000901 | 1.253913 | 0.004145 | TRUE |
| Rhog          | 3.74E-07 | 1.253725 | 6.18E-06 | TRUE |
| Slc25a3       | 0.01126  | 1.253635 | 0.031847 | TRUE |
| Faim          | 1.37E-13 | 1.252291 | 9.60E-12 | TRUE |
| Sec62         | 0.000266 | 1.251994 | 0.00154  | TRUE |
| Clint1        | 2.69E-06 | 1.249175 | 3.39E-05 | TRUE |
| Selplg        | 0.001627 | 1.247825 | 0.006706 | TRUE |
| Lypla2        | 2.00E-08 | 1.245754 | 4.78E-07 | TRUE |
| Spcs1         | 2.67E-05 | 1.24519  | 0.000232 | TRUE |
| Bsg           | 6.87E-07 | 1.24505  | 1.06E-05 | TRUE |
| Lsp1          | 4.68E-05 | 1.243306 | 0.00037  | TRUE |
| Gnas          | 0.000219 | 1.242927 | 0.001308 | TRUE |
| Cyth4         | 4.64E-09 | 1.242854 | 1.31E-07 | TRUE |
| Ndfip1        | 1.40E-06 | 1.242794 | 1.95E-05 | TRUE |
| Trp53inp1     | 3.98E-13 | 1.242227 | 2.60E-11 | TRUE |
| Mthfs         | 8.81E-13 | 1.240348 | 5.50E-11 | TRUE |
| Stk24         | 3.72E-05 | 1.240032 | 0.000304 | TRUE |
| Ube2m         | 9.59E-10 | 1.239533 | 3.19E-08 | TRUE |
| Klf13         | 0.004893 | 1.238826 | 0.01638  | TRUE |

|               |          |          |          |      |
|---------------|----------|----------|----------|------|
| Tmem167       | 1.23E-05 | 1.237528 | 0.00012  | TRUE |
| Ube2r2        | 9.57E-10 | 1.235409 | 3.19E-08 | TRUE |
| Maf1          | 5.54E-06 | 1.23434  | 6.18E-05 | TRUE |
| Sod1          | 9.51E-11 | 1.234156 | 3.99E-09 | TRUE |
| Mtpn          | 2.43E-11 | 1.233659 | 1.13E-09 | TRUE |
| Arl6ip1       | 0.001528 | 1.233589 | 0.006367 | TRUE |
| Dbnl          | 1.20E-05 | 1.231123 | 0.000118 | TRUE |
| H2-Q7         | 4.52E-05 | 1.230338 | 0.00036  | TRUE |
| Gna15         | 1.20E-12 | 1.23002  | 7.12E-11 | TRUE |
| Lamtor4       | 3.93E-08 | 1.22786  | 8.85E-07 | TRUE |
| Rgs16         | 2.44E-30 | 1.227185 | 7.24E-28 | TRUE |
| Cab39         | 1.39E-07 | 1.226543 | 2.69E-06 | TRUE |
| 1810037117Rik | 0.000826 | 1.22629  | 0.003841 | TRUE |
| Nr4a3         | 4.26E-17 | 1.225986 | 4.83E-15 | TRUE |
| Ppp4c         | 0.001345 | 1.225171 | 0.005735 | TRUE |
| Cytip         | 0.005499 | 1.224489 | 0.01802  | TRUE |
| Mbnl1         | 0.004679 | 1.224422 | 0.015836 | TRUE |
| Slc3a2        | 0.010091 | 1.222693 | 0.029148 | TRUE |
| Tapbp1        | 4.80E-10 | 1.222258 | 1.74E-08 | TRUE |
| Ctss          | 4.52E-06 | 1.221827 | 5.24E-05 | TRUE |
| Gimap5        | 3.65E-05 | 1.219343 | 0.0003   | TRUE |
| Hspa1a        | 3.12E-05 | 1.219207 | 0.000264 | TRUE |
| Fermt3        | 3.48E-07 | 1.218912 | 5.83E-06 | TRUE |
| Ywhaz         | 6.45E-05 | 1.217919 | 0.000484 | TRUE |
| Tmem123       | 9.99E-07 | 1.217579 | 1.46E-05 | TRUE |
| Adrbk1        | 1.10E-06 | 1.217538 | 1.61E-05 | TRUE |
| Atpif1        | 4.16E-08 | 1.217494 | 9.33E-07 | TRUE |
| Rab8b         | 1.06E-08 | 1.217173 | 2.71E-07 | TRUE |
| Arpc4         | 0.001546 | 1.21619  | 0.006421 | TRUE |
| Atp5c1        | 0.012351 | 1.216084 | 0.034409 | TRUE |
| Prkca         | 0.000105 | 1.213433 | 0.000714 | TRUE |
| Ii21r         | 3.02E-06 | 1.213383 | 3.73E-05 | TRUE |
| Gimap3        | 0.003578 | 1.212245 | 0.01273  | TRUE |
| Unc119        | 2.96E-14 | 1.211254 | 2.29E-12 | TRUE |
| Pdpf          | 0.000102 | 1.210007 | 0.000702 | TRUE |
| Ndufb7        | 0.000348 | 1.209708 | 0.001909 | TRUE |
| Tpr           | 0.000236 | 1.208858 | 0.001396 | TRUE |
| Ndufa7        | 0.00427  | 1.208758 | 0.01469  | TRUE |
| Sec11c        | 4.15E-05 | 1.20811  | 0.000335 | TRUE |
| Fmnl1         | 1.44E-05 | 1.205103 | 0.000138 | TRUE |
| Cox7b         | 0.009259 | 1.202971 | 0.027209 | TRUE |
| Ythdc1        | 1.74E-06 | 1.202844 | 2.36E-05 | TRUE |
| Ccr2          | 7.44E-10 | 1.202736 | 2.54E-08 | TRUE |
| Lman2         | 8.52E-06 | 1.201721 | 8.86E-05 | TRUE |
| Dusp4         | 7.37E-50 | 1.199921 | 4.76E-47 | TRUE |
| Celf2         | 0.002122 | 1.197906 | 0.008311 | TRUE |
| Dazap2        | 0.001889 | 1.193827 | 0.00754  | TRUE |
| Psmb1         | 0.004571 | 1.192279 | 0.015533 | TRUE |
| Mier1         | 2.01E-07 | 1.191124 | 3.69E-06 | TRUE |
| Sh3glb1       | 0.001487 | 1.19084  | 0.006226 | TRUE |
| Sh2d1a        | 5.35E-06 | 1.190235 | 6.02E-05 | TRUE |
| Tln1          | 4.52E-05 | 1.189708 | 0.00036  | TRUE |
| Esd           | 1.99E-06 | 1.189396 | 2.63E-05 | TRUE |
| Mcl1          | 0.00066  | 1.189215 | 0.003199 | TRUE |
| Mdh1          | 9.57E-05 | 1.187957 | 0.000668 | TRUE |
| Pla2g16       | 0.000137 | 1.184857 | 0.000897 | TRUE |
| Batf          | 1.30E-10 | 1.183998 | 5.26E-09 | TRUE |
| Calm2         | 0.01916  | 1.183589 | 0.049222 | TRUE |
| Mbd2          | 2.32E-05 | 1.181992 | 0.000206 | TRUE |

|               |          |          |          |      |
|---------------|----------|----------|----------|------|
| Bst2          | 1.18E-07 | 1.181981 | 2.31E-06 | TRUE |
| Ak2           | 1.23E-09 | 1.181771 | 4.04E-08 | TRUE |
| Tma7          | 0.000136 | 1.181054 | 0.000891 | TRUE |
| Ppp1r18       | 0.001687 | 1.175735 | 0.006894 | TRUE |
| Psma3         | 0.005116 | 1.175255 | 0.017004 | TRUE |
| Ngfrap1       | 1.92E-07 | 1.172726 | 3.55E-06 | TRUE |
| Snrpb         | 0.013053 | 1.172683 | 0.035922 | TRUE |
| Atp6v0e       | 0.01084  | 1.172628 | 0.030865 | TRUE |
| Ccni2         | 6.65E-05 | 1.17255  | 0.000497 | TRUE |
| Mtdh          | 4.00E-06 | 1.170901 | 4.72E-05 | TRUE |
| Grap          | 0.000334 | 1.170762 | 0.001845 | TRUE |
| Brk1          | 0.000695 | 1.169354 | 0.003333 | TRUE |
| 1110004F10Rik | 1.54E-05 | 1.168922 | 0.000145 | TRUE |
| Flna          | 4.27E-07 | 1.168812 | 6.96E-06 | TRUE |
| Psma2         | 0.006317 | 1.168016 | 0.020084 | TRUE |
| Tap1          | 7.27E-06 | 1.16706  | 7.75E-05 | TRUE |
| Rab11a        | 2.04E-07 | 1.166194 | 3.74E-06 | TRUE |
| Capn1         | 4.17E-11 | 1.165575 | 1.81E-09 | TRUE |
| ldh3b         | 3.49E-06 | 1.164488 | 4.23E-05 | TRUE |
| Mif4gd        | 1.62E-08 | 1.160723 | 3.96E-07 | TRUE |
| Hprt          | 3.28E-05 | 1.159479 | 0.000276 | TRUE |
| Pdap1         | 1.19E-07 | 1.158149 | 2.33E-06 | TRUE |
| Ucp2          | 0.010929 | 1.156907 | 0.031054 | TRUE |
| Snx2          | 2.53E-10 | 1.155772 | 9.60E-09 | TRUE |
| Zc3hav1       | 0.000175 | 1.154243 | 0.001092 | TRUE |
| Rps6ka1       | 5.99E-09 | 1.154172 | 1.63E-07 | TRUE |
| Bmyc          | 1.96E-15 | 1.152788 | 1.80E-13 | TRUE |
| Map1lc3b      | 0.017704 | 1.151298 | 0.046157 | TRUE |
| Rab11b        | 0.000124 | 1.150973 | 0.000823 | TRUE |
| Tmem64        | 4.88E-08 | 1.149858 | 1.07E-06 | TRUE |
| Kif5b         | 0.00016  | 1.147406 | 0.001017 | TRUE |
| Plp2          | 2.03E-17 | 1.146204 | 2.42E-15 | TRUE |
| Snrpd2        | 0.000784 | 1.145874 | 0.003682 | TRUE |
| Hnrnpm        | 0.000894 | 1.145108 | 0.004119 | TRUE |
| Taf10         | 0.000589 | 1.143927 | 0.002919 | TRUE |
| Tm9sf3        | 2.78E-05 | 1.143475 | 0.000241 | TRUE |
| Adipor1       | 7.59E-05 | 1.142935 | 0.000553 | TRUE |
| Eif4h         | 6.61E-06 | 1.14246  | 7.17E-05 | TRUE |
| Tmem160       | 1.21E-05 | 1.142249 | 0.000119 | TRUE |
| Bcl2a1b       | 0.000314 | 1.139497 | 0.001755 | TRUE |
| Il2ra         | 1.43E-60 | 1.138402 | 1.21E-57 | TRUE |
| Ubal2         | 0.000111 | 1.137984 | 0.000748 | TRUE |
| Ubl5          | 0.009716 | 1.137533 | 0.028267 | TRUE |
| Ikzf3         | 4.00E-08 | 1.137092 | 9.00E-07 | TRUE |
| Rrbp1         | 1.41E-10 | 1.136758 | 5.57E-09 | TRUE |
| H1f0          | 5.94E-10 | 1.135697 | 2.07E-08 | TRUE |
| Psmb2         | 0.000102 | 1.134568 | 0.000702 | TRUE |
| Vcp           | 7.66E-06 | 1.131892 | 8.11E-05 | TRUE |
| Peli1         | 0.004693 | 1.131811 | 0.015876 | TRUE |
| Ppp1ca        | 0.000521 | 1.131704 | 0.002634 | TRUE |
| Pmaip1        | 1.60E-26 | 1.131425 | 3.75E-24 | TRUE |
| Tank          | 1.09E-13 | 1.13017  | 7.70E-12 | TRUE |
| Banf1         | 1.14E-05 | 1.129883 | 0.000113 | TRUE |
| Atp5j2        | 0.006036 | 1.128749 | 0.019421 | TRUE |
| Gapdh         | 4.94E-05 | 1.128524 | 0.000387 | TRUE |
| Pkm           | 0.00074  | 1.127612 | 0.003515 | TRUE |
| Hnrnpu        | 0.010447 | 1.12436  | 0.029939 | TRUE |
| Dnaja1        | 0.00813  | 1.123558 | 0.024584 | TRUE |
| Ssr4          | 0.000147 | 1.123076 | 0.000953 | TRUE |

|             |          |          |          |      |
|-------------|----------|----------|----------|------|
| Rabgap1l    | 7.04E-08 | 1.120587 | 1.46E-06 | TRUE |
| Matk        | 2.66E-36 | 1.120291 | 1.12E-33 | TRUE |
| Igtp        | 8.22E-08 | 1.120149 | 1.67E-06 | TRUE |
| BC021614    | 5.99E-10 | 1.117718 | 2.08E-08 | TRUE |
| Sec61g      | 0.014674 | 1.117299 | 0.039441 | TRUE |
| Sys1        | 8.44E-05 | 1.115811 | 0.000605 | TRUE |
| Krtcap2     | 0.01329  | 1.114612 | 0.036425 | TRUE |
| Maz         | 7.38E-07 | 1.114405 | 1.12E-05 | TRUE |
| Ran         | 0.017677 | 1.113266 | 0.046124 | TRUE |
| Papola      | 0.000161 | 1.111448 | 0.001023 | TRUE |
| Denr        | 3.08E-07 | 1.109675 | 5.35E-06 | TRUE |
| Tnip1       | 7.83E-12 | 1.109125 | 4.02E-10 | TRUE |
| Ndufb8      | 6.35E-05 | 1.108483 | 0.000478 | TRUE |
| Serinc1     | 6.38E-06 | 1.108144 | 6.96E-05 | TRUE |
| Ppil1       | 1.18E-14 | 1.106808 | 9.72E-13 | TRUE |
| Gm26917     | 0.017697 | 1.105804 | 0.046157 | TRUE |
| Kcnn4       | 6.82E-06 | 1.105484 | 7.37E-05 | TRUE |
| D8Erttd738e | 0.009768 | 1.105311 | 0.028372 | TRUE |
| Ap2s1       | 2.32E-05 | 1.103956 | 0.000206 | TRUE |
| Psm4        | 1.59E-05 | 1.103931 | 0.000149 | TRUE |
| Ssbp3       | 1.14E-11 | 1.103451 | 5.70E-10 | TRUE |
| BC056474    | 1.35E-06 | 1.103104 | 1.90E-05 | TRUE |
| Gltsr2      | 0.004864 | 1.102497 | 0.016308 | TRUE |
| Tpgs1       | 2.38E-12 | 1.102184 | 1.35E-10 | TRUE |
| Hilpda      | 8.36E-13 | 1.10215  | 5.25E-11 | TRUE |
| Ifi203      | 0.002505 | 1.101608 | 0.009511 | TRUE |
| Arl5c       | 7.68E-13 | 1.100954 | 4.85E-11 | TRUE |
| Thrap3      | 3.30E-06 | 1.098163 | 4.03E-05 | TRUE |
| Med28       | 0.005571 | 1.097417 | 0.018231 | TRUE |
| Cxcr3       | 0.000473 | 1.096493 | 0.002437 | TRUE |
| BC037034    | 2.28E-13 | 1.095697 | 1.51E-11 | TRUE |
| Dynll1      | 0.009761 | 1.094692 | 0.028358 | TRUE |
| Mrps24      | 0.000327 | 1.093024 | 0.001814 | TRUE |
| Acin1       | 4.38E-06 | 1.091715 | 5.08E-05 | TRUE |
| Gbp7        | 8.99E-09 | 1.091205 | 2.35E-07 | TRUE |
| Serpina3g   | 3.95E-11 | 1.090562 | 1.72E-09 | TRUE |
| Ergic3      | 4.72E-08 | 1.088986 | 1.04E-06 | TRUE |
| Rnh1        | 2.46E-09 | 1.088493 | 7.54E-08 | TRUE |
| Capza2      | 0.000567 | 1.088175 | 0.002819 | TRUE |
| Uqcrc1      | 0.000147 | 1.087357 | 0.000953 | TRUE |
| S1pr4       | 2.20E-05 | 1.087172 | 0.000197 | TRUE |
| Metap2      | 6.62E-08 | 1.087136 | 1.39E-06 | TRUE |
| Tnfaip3     | 0.006555 | 1.086751 | 0.020669 | TRUE |
| Sema4d      | 3.00E-07 | 1.086615 | 5.23E-06 | TRUE |
| Fam46a      | 2.06E-13 | 1.086033 | 1.41E-11 | TRUE |
| Eif1ax      | 1.70E-07 | 1.085867 | 3.22E-06 | TRUE |
| Txn1        | 0.011234 | 1.085026 | 0.031792 | TRUE |
| Ghitm       | 0.000376 | 1.083333 | 0.002018 | TRUE |
| Rab14       | 0.000215 | 1.081741 | 0.001296 | TRUE |
| Ntan1       | 3.74E-06 | 1.081394 | 4.49E-05 | TRUE |
| Psm9        | 0.00507  | 1.081225 | 0.01687  | TRUE |
| Cnppd1      | 6.89E-08 | 1.080397 | 1.44E-06 | TRUE |
| Ddit4       | 1.78E-15 | 1.079796 | 1.65E-13 | TRUE |
| Plekhj1     | 0.000651 | 1.078627 | 0.003163 | TRUE |
| Prdx2       | 0.00011  | 1.077873 | 0.000739 | TRUE |
| Inpp5d      | 1.14E-07 | 1.075037 | 2.25E-06 | TRUE |
| Ebp         | 6.87E-10 | 1.075035 | 2.35E-08 | TRUE |
| Git2        | 9.04E-06 | 1.073143 | 9.32E-05 | TRUE |
| Cnn2        | 0.015562 | 1.072876 | 0.041431 | TRUE |



|               |          |          |          |      |
|---------------|----------|----------|----------|------|
| Prdx5         | 0.001294 | 1.072405 | 0.005574 | TRUE |
| 2010111I01Rik | 2.11E-12 | 1.072014 | 1.21E-10 | TRUE |
| Gnb1          | 0.008931 | 1.071285 | 0.026466 | TRUE |
| Cish          | 2.89E-11 | 1.071278 | 1.32E-09 | TRUE |
| Ssu72         | 0.000218 | 1.070346 | 0.001308 | TRUE |
| 2310001H17Rik | 5.91E-09 | 1.069402 | 1.62E-07 | TRUE |
| Rbms1         | 6.47E-05 | 1.068905 | 0.000486 | TRUE |
| Eif3d         | 1.92E-05 | 1.068852 | 0.000176 | TRUE |
| Huwe1         | 3.61E-10 | 1.067624 | 1.34E-08 | TRUE |
| St13          | 0.002677 | 1.067601 | 0.01006  | TRUE |
| Igbp1         | 2.79E-07 | 1.067316 | 4.90E-06 | TRUE |
| Sdhd          | 4.93E-08 | 1.065321 | 1.07E-06 | TRUE |
| Cbl           | 1.88E-07 | 1.065032 | 3.49E-06 | TRUE |
| Aup1          | 2.81E-06 | 1.065031 | 3.53E-05 | TRUE |
| Ubtf          | 1.87E-06 | 1.063879 | 2.51E-05 | TRUE |
| Nr4a2         | 6.36E-09 | 1.062755 | 1.72E-07 | TRUE |
| Fxyd5         | 0.000352 | 1.061396 | 0.001925 | TRUE |
| Sep-09        | 0.002159 | 1.061132 | 0.008436 | TRUE |
| Atrx          | 1.47E-06 | 1.060455 | 2.04E-05 | TRUE |
| Cox6c         | 0.003805 | 1.060059 | 0.013353 | TRUE |
| Cisd2         | 9.38E-06 | 1.059617 | 9.58E-05 | TRUE |
| Grb2          | 0.000787 | 1.059043 | 0.003689 | TRUE |
| Anxa11        | 7.95E-08 | 1.058766 | 1.62E-06 | TRUE |
| Pacs1         | 4.77E-14 | 1.056734 | 3.54E-12 | TRUE |
| Cox20         | 7.26E-06 | 1.056346 | 7.75E-05 | TRUE |
| Sipa1         | 0.000445 | 1.054287 | 0.002323 | TRUE |
| Cdkn1b        | 0.000102 | 1.054023 | 0.000701 | TRUE |
| H2-T22        | 0.01014  | 1.0536   | 0.029251 | TRUE |
| Tgfb1         | 1.17E-20 | 1.05285  | 1.76E-18 | TRUE |
| Ifi35         | 4.92E-08 | 1.052712 | 1.07E-06 | TRUE |
| Tecr          | 0.005566 | 1.051712 | 0.018218 | TRUE |
| Mrps21        | 0.000443 | 1.051673 | 0.002318 | TRUE |
| Arhgap9       | 0.000436 | 1.051455 | 0.002288 | TRUE |
| Rnf114        | 3.11E-05 | 1.051211 | 0.000264 | TRUE |
| Serp1         | 0.000569 | 1.050965 | 0.002826 | TRUE |
| Rsrc2         | 0.014881 | 1.050948 | 0.039918 | TRUE |
| Sema4b        | 2.63E-25 | 1.050333 | 5.89E-23 | TRUE |
| Camk2d        | 8.35E-07 | 1.049995 | 1.25E-05 | TRUE |
| Ppp2ca        | 0.006973 | 1.049916 | 0.021681 | TRUE |
| Rfk           | 7.15E-13 | 1.049803 | 4.54E-11 | TRUE |
| Cd164         | 3.45E-05 | 1.049725 | 0.000288 | TRUE |
| Csnk1a1       | 0.003188 | 1.048647 | 0.011606 | TRUE |
| Spop          | 3.20E-05 | 1.047784 | 0.000271 | TRUE |
| Fundc2        | 1.35E-05 | 1.045258 | 0.00013  | TRUE |
| Uqcrc2        | 0.000413 | 1.04508  | 0.00218  | TRUE |
| Eif3a         | 5.90E-05 | 1.044272 | 0.000448 | TRUE |
| Cenpa         | 2.65E-11 | 1.042838 | 1.22E-09 | TRUE |
| Abi1          | 7.35E-06 | 1.042754 | 7.82E-05 | TRUE |
| Pttg1         | 1.23E-05 | 1.042147 | 0.00012  | TRUE |
| Plk3          | 1.08E-10 | 1.041249 | 4.48E-09 | TRUE |
| Dgkz          | 8.45E-06 | 1.040409 | 8.80E-05 | TRUE |
| Eif3l         | 6.51E-07 | 1.038927 | 1.00E-05 | TRUE |
| Srrm1         | 0.00011  | 1.038724 | 0.000742 | TRUE |
| Snx18         | 2.58E-11 | 1.037432 | 1.20E-09 | TRUE |
| Psmb4         | 5.24E-05 | 1.036826 | 0.000405 | TRUE |
| Def6          | 5.34E-06 | 1.036382 | 6.01E-05 | TRUE |
| Dync1i2       | 5.56E-05 | 1.036274 | 0.000427 | TRUE |
| Fnbp1         | 1.86E-06 | 1.035243 | 2.50E-05 | TRUE |
| Akirin2       | 5.03E-07 | 1.03509  | 8.02E-06 | TRUE |

|            |          |          |          |      |
|------------|----------|----------|----------|------|
| Rsb1l1     | 4.80E-05 | 1.032786 | 0.000379 | TRUE |
| Ptpn1      | 1.04E-05 | 1.031734 | 0.000104 | TRUE |
| Apobec3    | 0.000273 | 1.030512 | 0.001568 | TRUE |
| Cxcr4      | 1.17E-07 | 1.030045 | 2.30E-06 | TRUE |
| Hsp90b1    | 0.003452 | 1.02997  | 0.012356 | TRUE |
| Sh2b1      | 7.34E-11 | 1.027859 | 3.12E-09 | TRUE |
| Msi2       | 7.66E-09 | 1.027843 | 2.04E-07 | TRUE |
| Naa10      | 4.90E-07 | 1.026968 | 7.82E-06 | TRUE |
| Cwc15      | 0.000925 | 1.025698 | 0.004217 | TRUE |
| Al467606   | 6.33E-07 | 1.02514  | 9.81E-06 | TRUE |
| Ggnbp2     | 9.79E-05 | 1.024479 | 0.000679 | TRUE |
| Ostc       | 0.000156 | 1.024415 | 0.000994 | TRUE |
| Fyn        | 0.004838 | 1.023856 | 0.016241 | TRUE |
| Prrc2c     | 0.000564 | 1.022869 | 0.002808 | TRUE |
| Dnajc8     | 0.005799 | 1.022119 | 0.018845 | TRUE |
| Ube2g1     | 5.03E-08 | 1.019729 | 1.09E-06 | TRUE |
| Sash3      | 3.18E-05 | 1.019033 | 0.000269 | TRUE |
| Sfrs18     | 0.000166 | 1.018001 | 0.001048 | TRUE |
| Arhgef2    | 1.27E-10 | 1.014072 | 5.16E-09 | TRUE |
| Mien1      | 0.000459 | 1.013882 | 0.002386 | TRUE |
| Lbr        | 0.000983 | 1.013879 | 0.004434 | TRUE |
| Atp5e      | 0.006055 | 1.013203 | 0.01946  | TRUE |
| Ifrd1      | 4.83E-07 | 1.011891 | 7.75E-06 | TRUE |
| Dnajc1     | 1.05E-07 | 1.011486 | 2.09E-06 | TRUE |
| Fli1       | 9.25E-05 | 1.010958 | 0.000652 | TRUE |
| Mrps23     | 5.55E-08 | 1.010948 | 1.19E-06 | TRUE |
| Ogt        | 0.002452 | 1.009601 | 0.009357 | TRUE |
| Smarca5    | 3.12E-06 | 1.008742 | 3.83E-05 | TRUE |
| Fam129a    | 4.35E-16 | 1.007924 | 4.31E-14 | TRUE |
| Cstb       | 3.60E-06 | 1.005583 | 4.35E-05 | TRUE |
| Tnk2       | 3.21E-14 | 1.00558  | 2.47E-12 | TRUE |
| Os9        | 2.06E-05 | 1.005531 | 0.000187 | TRUE |
| Tmed5      | 2.11E-05 | 1.005258 | 0.00019  | TRUE |
| Fam104a    | 0.000358 | 1.005179 | 0.001945 | TRUE |
| Kmt2e      | 0.000503 | 1.005139 | 0.002555 | TRUE |
| D16Ert472e | 1.35E-08 | 1.004871 | 3.37E-07 | TRUE |
| Snw1       | 3.66E-06 | 1.004493 | 4.40E-05 | TRUE |
| Hnrnp11    | 1.45E-12 | 1.003687 | 8.51E-11 | TRUE |
| Tap2       | 0.000478 | 1.003054 | 0.002454 | TRUE |
| Ifnar1     | 9.80E-06 | 1.001272 | 9.91E-05 | TRUE |
| Capn2      | 3.86E-06 | 1.000908 | 4.60E-05 | TRUE |
| Actn1      | 5.32E-06 | -1.02678 | 6.00E-05 | TRUE |
| Dapl1      | 6.28E-08 | -1.16357 | 1.33E-06 | TRUE |
| Cd40lg     | 1.92E-07 | -1.28461 | 3.56E-06 | TRUE |
| Lef1       | 3.63E-09 | -1.45647 | 1.06E-07 | TRUE |
| Tcf7       | 5.21E-12 | -1.54543 | 2.75E-10 | TRUE |
| Igfbp4     | 2.46E-09 | -1.57037 | 7.54E-08 | TRUE |
| Satb1      | 1.57E-10 | -1.71531 | 6.13E-09 | TRUE |

|                    |          |          |   |
|--------------------|----------|----------|---|
| ENSMUSG00000019987 | Arg1     | 0.548171 | 2 |
| ENSMUSG00000019558 | Slc6a8   | 0.540746 | 2 |
| ENSMUSG00000030162 | Olr1     | 0.53984  | 2 |
| ENSMUSG00000025574 | Tk1      | 0.539186 | 2 |
| ENSMUSG00000028238 | Atp6v0d2 | 0.538357 | 2 |
| ENSMUSG00000028583 | Pdpn     | 0.53812  | 2 |
| ENSMUSG00000029379 | Cxcl3    | 0.537784 | 2 |
| ENSMUSG00000027358 | Bmp2     | 0.535697 | 2 |
| ENSMUSG00000039952 | Dag1     | 0.535293 | 2 |
| ENSMUSG00000031443 | F7       | 0.534915 | 2 |
| ENSMUSG00000004032 | Gstm5    | 0.52929  | 2 |
| ENSMUSG00000025355 | Mmp19    | 0.528793 | 2 |
| ENSMUSG00000032766 | Gng11    | 0.528563 | 2 |
| ENSMUSG00000025993 | Slc40a1  | 0.528443 | 2 |
| ENSMUSG00000031596 | Slc7a2   | 0.528252 | 2 |
| ENSMUSG00000029378 | Areg     | 0.528116 | 2 |
| ENSMUSG00000027611 | Procr    | 0.528102 | 2 |
| ENSMUSG00000016529 | Il10     | 0.524609 | 2 |
| ENSMUSG00000025150 | Cbr2     | 0.523775 | 2 |
| ENSMUSG00000041324 | Inhba    | 0.523508 | 2 |
| ENSMUSG00000027715 | Ccna2    | 0.521773 | 2 |
| ENSMUSG00000032725 | Folr2    | 0.520099 | 2 |
| ENSMUSG00000032085 | Tagln    | 0.519779 | 2 |
| ENSMUSG00000072812 | Ahnak2   | 0.519242 | 2 |
| ENSMUSG00000026605 | Cenpf    | 0.518237 | 2 |
| ENSMUSG00000004814 | Ccl24    | 0.517999 | 2 |
| ENSMUSG00000016283 | H2-M2    | 0.515521 | 2 |
| ENSMUSG00000037664 | Cdkn1c   | 0.514992 | 2 |
| ENSMUSG00000027276 | Jag1     | 0.514972 | 2 |
| ENSMUSG00000028339 | Col15a1  | 0.514942 | 2 |
| ENSMUSG00000041431 | Ccnb1    | 0.51489  | 2 |
| ENSMUSG00000057722 | Lepr     | 0.514707 | 2 |
| ENSMUSG00000030117 | Gdf3     | 0.513762 | 2 |
| ENSMUSG00000031375 | Bgn      | 0.511895 | 2 |
| ENSMUSG00000028111 | Ctsk     | 0.51109  | 2 |
| ENSMUSG00000025383 | Il23a    | 0.510578 | 2 |
| ENSMUSG00000028464 | Tpm2     | 0.509618 | 2 |
| ENSMUSG00000019874 | Fabp7    | 0.509232 | 2 |
| ENSMUSG00000036103 | Colec12  | 0.508349 | 2 |
| ENSMUSG00000026938 | Fcna     | 0.508158 | 2 |
| ENSMUSG00000029819 | Npy      | 0.507753 | 2 |
| ENSMUSG00000032911 | Cspg4    | 0.507437 | 2 |
| ENSMUSG00000050493 | Fam167b  | 0.507331 | 2 |
| ENSMUSG00000044701 | Il27     | 0.506893 | 2 |
| ENSMUSG00000030963 | Umod     | 0.506761 | 2 |
| ENSMUSG00000022122 | Ednrb    | 0.506506 | 2 |
| ENSMUSG00000061353 | Cxcl12   | 0.505634 | 2 |
| ENSMUSG00000026390 | Marco    | 0.505396 | 2 |
| ENSMUSG00000041202 | Pla2g2d  | 0.50537  | 2 |
| ENSMUSG00000020264 | Slc36a2  | 0.505216 | 2 |
| ENSMUSG00000015854 | Cd5l     | 0.50424  | 2 |
| ENSMUSG00000023078 | Cxcl13   | 0.503745 | 2 |
| ENSMUSG00000085949 | Gm14275  | 0.503361 | 2 |
| ENSMUSG00000047222 | Ear11    | 0.503025 | 2 |
| ENSMUSG00000033207 | Mamdc2   | 0.50266  | 2 |
| ENSMUSG00000030787 | Lyve1    | 0.502178 | 2 |
| ENSMUSG00000039196 | Orm1     | 0.501554 | 2 |
| ENSMUSG00000074486 | Bglap2   | 0.501535 | 2 |
| ENSMUSG00000018924 | Alox15   | 0.501333 | 2 |

|                    |               |          |   |
|--------------------|---------------|----------|---|
| ENSMUSG00000029377 | Ereg          | 0.500844 | 2 |
| ENSMUSG00000104606 | NA            | 0.500348 | 2 |
| ENSMUSG00000025492 | Ifitm3        | 0.78415  | 3 |
| ENSMUSG00000018585 | Atox1         | 0.752418 | 3 |
| ENSMUSG00000027398 | Il1b          | 0.727449 | 3 |
| ENSMUSG00000015312 | Gadd45b       | 0.723804 | 3 |
| ENSMUSG00000018927 | Ccl6          | 0.699049 | 3 |
| ENSMUSG00000019122 | Ccl9          | 0.691562 | 3 |
| ENSMUSG00000069792 | Wfdc17        | 0.672051 | 3 |
| ENSMUSG00000026073 | Il1r2         | 0.671702 | 3 |
| ENSMUSG00000033213 | AA467197      | 0.664625 | 3 |
| ENSMUSG00000028341 | Nr4a3         | 0.661368 | 3 |
| ENSMUSG00000047945 | Marcks1       | 0.660664 | 3 |
| ENSMUSG00000025491 | Ifitm1        | 0.640637 | 3 |
| ENSMUSG00000030530 | Furin         | 0.638954 | 3 |
| ENSMUSG00000037820 | Tgm2          | 0.635674 | 3 |
| ENSMUSG00000027533 | Fabp5         | 0.632839 | 3 |
| ENSMUSG00000031780 | Ccl17         | 0.627022 | 3 |
| ENSMUSG00000057666 | Gapdh         | 0.622932 | 3 |
| ENSMUSG00000053113 | Socs3         | 0.620672 | 3 |
| ENSMUSG00000032487 | Ptgs2         | 0.617128 | 3 |
| ENSMUSG00000027737 | Slc7a11       | 0.616564 | 3 |
| ENSMUSG00000098178 | Gm26924       | 0.613508 | 3 |
| ENSMUSG00000025473 | Adam8         | 0.61268  | 3 |
| ENSMUSG00000056737 | Capg          | 0.612423 | 3 |
| ENSMUSG00000035692 | Isg15         | 0.601497 | 3 |
| ENSMUSG00000043421 | Hilpda        | 0.597497 | 3 |
| ENSMUSG00000062248 | Cks2          | 0.597213 | 3 |
| ENSMUSG00000027360 | Hdc           | 0.592752 | 3 |
| ENSMUSG00000031762 | Mt2           | 0.592531 | 3 |
| ENSMUSG00000028044 | Cks1b         | 0.589796 | 3 |
| ENSMUSG00000045502 | Niacr1        | 0.588304 | 3 |
| ENSMUSG00000028270 | Gbp2          | 0.584613 | 3 |
| ENSMUSG00000042265 | Trem1         | 0.571589 | 3 |
| ENSMUSG00000009633 | G0s2          | 0.565361 | 3 |
| ENSMUSG00000029177 | Cenpa         | 0.562966 | 3 |
| ENSMUSG00000022126 | Irg1          | 0.562329 | 3 |
| ENSMUSG00000049932 | H2afx         | 0.561318 | 3 |
| ENSMUSG00000017737 | Mmp9          | 0.558571 | 3 |
| ENSMUSG00000051748 | 1100001G20Rik | 0.553594 | 3 |
| ENSMUSG00000005125 | Ndrp1         | 0.551633 | 3 |
| ENSMUSG00000026822 | Lcn2          | 0.549665 | 3 |
| ENSMUSG00000029417 | Cxcl9         | 0.547209 | 3 |
| ENSMUSG00000022651 | Retnlg        | 0.546034 | 3 |
| ENSMUSG00000037095 | Lrg1          | 0.543865 | 3 |
| ENSMUSG00000031004 | Mki67         | 0.543532 | 3 |
| ENSMUSG00000001131 | Timp1         | 0.542297 | 3 |
| ENSMUSG00000020641 | Rsad2         | 0.542136 | 3 |
| ENSMUSG00000033508 | Asprv1        | 0.537715 | 3 |
| ENSMUSG00000017716 | Birc5         | 0.536299 | 3 |
| ENSMUSG00000040204 | 2810417H13Rik | 0.535845 | 3 |
| ENSMUSG00000020914 | Top2a         | 0.535636 | 3 |
| ENSMUSG00000028873 | Cdca8         | 0.535212 | 3 |
| ENSMUSG00000000303 | Cdh1          | 0.534406 | 3 |
| ENSMUSG00000023505 | Cdca3         | 0.529546 | 3 |
| ENSMUSG00000019942 | Cdk1          | 0.529299 | 3 |
| ENSMUSG00000027306 | Nusap1        | 0.528307 | 3 |
| ENSMUSG00000032218 | Ccnb2         | 0.52816  | 3 |
| ENSMUSG00000040963 | Asgr2         | 0.526497 | 3 |



|                    |          |          |   |
|--------------------|----------|----------|---|
| ENSMUSG00000044103 | Il1f9    | 0.526211 | 3 |
| ENSMUSG0000001403  | Ube2c    | 0.52578  | 3 |
| ENSMUSG00000059657 | Stfa2l1  | 0.522402 | 3 |
| ENSMUSG00000054072 | ligp1    | 0.521837 | 3 |
| ENSMUSG00000025746 | Il6      | 0.521703 | 3 |
| ENSMUSG00000026580 | Selp     | 0.519972 | 3 |
| ENSMUSG00000045328 | Cenpe    | 0.518001 | 3 |
| ENSMUSG00000020649 | Rrm2     | 0.516865 | 3 |
| ENSMUSG00000058773 | Hist1h1b | 0.516861 | 3 |
| ENSMUSG00000054855 | Rnd1     | 0.516745 | 3 |
| ENSMUSG00000031778 | Cx3cl1   | 0.516102 | 3 |
| ENSMUSG00000079597 | Gm5483   | 0.515271 | 3 |
| ENSMUSG00000016494 | Cd34     | 0.513408 | 3 |
| ENSMUSG00000035783 | Acta2    | 0.513226 | 3 |
| ENSMUSG00000038943 | Prc1     | 0.513026 | 3 |
| ENSMUSG00000006398 | Cdc20    | 0.51161  | 3 |
| ENSMUSG00000020330 | Hmmr     | 0.511446 | 3 |
| ENSMUSG00000023224 | Serping1 | 0.510247 | 3 |
| ENSMUSG00000053030 | Spink2   | 0.510009 | 3 |
| ENSMUSG00000028307 | Aldob    | 0.50997  | 3 |
| ENSMUSG00000027239 | Mdk      | 0.509658 | 3 |
| ENSMUSG00000019929 | Dcn      | 0.509186 | 3 |
| ENSMUSG00000045680 | Tcf21    | 0.508936 | 3 |
| ENSMUSG00000067818 | Myl9     | 0.508617 | 3 |
| ENSMUSG00000028031 | Dkk2     | 0.508506 | 3 |
| ENSMUSG00000022490 | Ppp1r1a  | 0.50846  | 3 |
| ENSMUSG00000031548 | Sfrp1    | 0.508277 | 3 |
| ENSMUSG00000036570 | Fxyd1    | 0.507805 | 3 |
| ENSMUSG00000004988 | Fxyd4    | 0.507369 | 3 |
| ENSMUSG00000001506 | Col1a1   | 0.506424 | 3 |
| ENSMUSG00000029661 | Col1a2   | 0.505882 | 3 |
| ENSMUSG00000033910 | Gucy1a3  | 0.505877 | 3 |
| ENSMUSG00000020810 | Cygb     | 0.504822 | 3 |
| ENSMUSG00000022157 | Mcpt8    | 0.504791 | 3 |
| ENSMUSG00000030069 | Prok2    | 0.504772 | 3 |
| ENSMUSG00000032323 | Cyp11a1  | 0.50472  | 3 |
| ENSMUSG00000029372 | Ppbp     | 0.50448  | 3 |
| ENSMUSG00000001865 | Cpa3     | 0.504043 | 3 |
| ENSMUSG00000019899 | Lama2    | 0.503719 | 3 |
| ENSMUSG00000032484 | Ngp      | 0.50365  | 3 |
| ENSMUSG00000027408 | Cpxm1    | 0.503491 | 3 |
| ENSMUSG00000037994 | Slc9b2   | 0.503418 | 3 |
| ENSMUSG00000028457 | Atp8b5   | 0.503367 | 3 |
| ENSMUSG00000026295 | Spp2     | 0.503258 | 3 |
| ENSMUSG00000027513 | Pck1     | 0.50271  | 3 |
| ENSMUSG00000009145 | Dqx1     | 0.50262  | 3 |
| ENSMUSG00000026414 | Tnnt2    | 0.502439 | 3 |
| ENSMUSG00000020695 | Mrc2     | 0.502403 | 3 |
| ENSMUSG00000069917 | Hba-a2   | 0.502358 | 3 |
| ENSMUSG00000071561 | BC100530 | 0.502351 | 3 |
| ENSMUSG00000027832 | Ptx3     | 0.50235  | 3 |
| ENSMUSG00000027254 | Map1a    | 0.502349 | 3 |
| ENSMUSG00000097467 | Gm26737  | 0.50231  | 3 |
| ENSMUSG00000031766 | Slc12a3  | 0.502271 | 3 |
| ENSMUSG00000071562 | Stfa1    | 0.502229 | 3 |
| ENSMUSG00000022445 | Cyp2d26  | 0.502065 | 3 |
| ENSMUSG00000032532 | Cck      | 0.5017   | 3 |
| ENSMUSG00000038357 | Camp     | 0.50121  | 3 |
| ENSMUSG00000094686 | Ccl21a   | 0.50121  | 3 |

|                    |               |          |   |
|--------------------|---------------|----------|---|
| ENSMUSG00000022902 | Stfa2         | 0.501193 | 3 |
| ENSMUSG00000044206 | Vsig4         | 0.501175 | 3 |
| ENSMUSG00000014542 | Clec4f        | 0.501175 | 3 |
| ENSMUSG00000078354 | Ifna2         | 0.50114  | 3 |
| ENSMUSG00000082976 | Gm15056       | 0.501123 | 3 |
| ENSMUSG00000030470 | Csrp3         | 0.501122 | 3 |
| ENSMUSG00000038583 | Pln           | 0.501017 | 3 |
| ENSMUSG00000071341 | Egr4          | 0.500627 | 3 |
| ENSMUSG00000022584 | Ly6c2         | 0.660858 | 4 |
| ENSMUSG00000038991 | Txndc5        | 0.653249 | 4 |
| ENSMUSG00000067149 | Igj           | 0.641728 | 4 |
| ENSMUSG00000046718 | Bst2          | 0.626164 | 4 |
| ENSMUSG00000053398 | Phgdh         | 0.61539  | 4 |
| ENSMUSG00000022838 | Eaf2          | 0.609017 | 4 |
| ENSMUSG00000022496 | Tnfrsf17      | 0.607217 | 4 |
| ENSMUSG00000009092 | Derl3         | 0.60643  | 4 |
| ENSMUSG00000020592 | Sdc1          | 0.60317  | 4 |
| ENSMUSG00000059743 | Fdps          | 0.602889 | 4 |
| ENSMUSG00000018293 | Pfn1          | 0.599429 | 4 |
| ENSMUSG00000044052 | Ccr10         | 0.599394 | 4 |
| ENSMUSG00000017002 | Slpi          | 0.5944   | 4 |
| ENSMUSG00000074227 | Spint2        | 0.588642 | 4 |
| ENSMUSG00000003355 | Fkbp11        | 0.579013 | 4 |
| ENSMUSG00000031880 | Rrad          | 0.572631 | 4 |
| ENSMUSG00000045394 | Epcam         | 0.562837 | 4 |
| ENSMUSG00000027073 | Prg2          | 0.559435 | 4 |
| ENSMUSG00000027203 | Dut           | 0.550099 | 4 |
| ENSMUSG00000074896 | Ifit3         | 0.543409 | 4 |
| ENSMUSG00000094777 | Hist1h2ap     | 0.542812 | 4 |
| ENSMUSG00000032758 | Kap           | 0.537666 | 4 |
| ENSMUSG00000018648 | Dusp14        | 0.537287 | 4 |
| ENSMUSG00000034459 | Ifit1         | 0.532151 | 4 |
| ENSMUSG00000065987 | Cd209b        | 0.528057 | 4 |
| ENSMUSG00000025279 | Dnase1l3      | 0.523181 | 4 |
| ENSMUSG00000028766 | Alpl          | 0.520271 | 4 |
| ENSMUSG00000052305 | Hbb-bs        | 0.519599 | 4 |
| ENSMUSG00000022613 | Miox          | 0.516269 | 4 |
| ENSMUSG00000028435 | Aqp3          | 0.515222 | 4 |
| ENSMUSG00000010830 | Kdelr3        | 0.514711 | 4 |
| ENSMUSG00000008601 | Rab25         | 0.51438  | 4 |
| ENSMUSG00000031760 | Mt3           | 0.514157 | 4 |
| ENSMUSG00000029223 | Uchl1         | 0.51395  | 4 |
| ENSMUSG00000040808 | S100g         | 0.511902 | 4 |
| ENSMUSG00000069919 | Hba-a1        | 0.510434 | 4 |
| ENSMUSG00000024503 | Spink3        | 0.50937  | 4 |
| ENSMUSG00000007888 | Crlf1         | 0.508628 | 4 |
| ENSMUSG00000033174 | Mgll          | 0.508198 | 4 |
| ENSMUSG00000057933 | Gsta2         | 0.507186 | 4 |
| ENSMUSG00000044678 | Ly6k          | 0.506712 | 4 |
| ENSMUSG00000023013 | Aqp2          | 0.505619 | 4 |
| ENSMUSG00000044303 | Cdkn2a        | 0.505505 | 4 |
| ENSMUSG00000025270 | Alas2         | 0.503074 | 4 |
| ENSMUSG00000020310 | Madcam1       | 0.502917 | 4 |
| ENSMUSG00000084843 | B230312C02Rik | 0.502881 | 4 |
| ENSMUSG00000036602 | Alx1          | 0.502813 | 4 |
| ENSMUSG00000027500 | Strmn2        | 0.502727 | 4 |
| ENSMUSG00000079168 | Cd209g        | 0.502672 | 4 |
| ENSMUSG00000051906 | Cd209f        | 0.502617 | 4 |
| ENSMUSG00000019278 | Dpep1         | 0.502585 | 4 |

|                    |          |          |   |
|--------------------|----------|----------|---|
| ENSMUSG00000074639 | BC089597 | 0.502531 | 4 |
| ENSMUSG00000027718 | Il21     | 0.502481 | 4 |
| ENSMUSG00000024032 | Tff1     | 0.502427 | 4 |
| ENSMUSG00000091956 | C2cd4b   | 0.50239  | 4 |
| ENSMUSG00000073940 | Hbb-bt   | 0.502144 | 4 |
| ENSMUSG00000074634 | Gm7120   | 0.501861 | 4 |
| ENSMUSG00000003379 | Cd79a    | 0.9965   | 5 |
| ENSMUSG00000057098 | Ebf1     | 0.98457  | 5 |
| ENSMUSG00000037548 | H2-DMb2  | 0.939187 | 5 |
| ENSMUSG00000090733 | Rps27    | 0.93442  | 5 |
| ENSMUSG00000034634 | Ly6d     | 0.925145 | 5 |
| ENSMUSG00000060743 | H3f3a    | 0.901949 | 5 |
| ENSMUSG00000037944 | Ccr7     | 0.888942 | 5 |
| ENSMUSG00000042474 | Faim3    | 0.887946 | 5 |
| ENSMUSG00000024673 | Ms4a1    | 0.88714  | 5 |
| ENSMUSG00000040592 | Cd79b    | 0.884087 | 5 |
| ENSMUSG00000040952 | Rps19    | 0.882695 | 5 |
| ENSMUSG00000045128 | Rpl18a   | 0.874224 | 5 |
| ENSMUSG00000074129 | Rpl13a   | 0.871743 | 5 |
| ENSMUSG00000028234 | Rps20    | 0.868258 | 5 |
| ENSMUSG00000064351 | mt-Co1   | 0.867674 | 5 |
| ENSMUSG00000064357 | mt-Atp6  | 0.866085 | 5 |
| ENSMUSG00000008683 | Rps15a   | 0.865623 | 5 |
| ENSMUSG00000022587 | Ly6e     | 0.86465  | 5 |
| ENSMUSG00000000740 | Rpl13    | 0.860956 | 5 |
| ENSMUSG00000061477 | Rps7     | 0.859508 | 5 |
| ENSMUSG00000064358 | mt-Co3   | 0.8512   | 5 |
| ENSMUSG00000031431 | Tsc22d3  | 0.850099 | 5 |
| ENSMUSG00000025647 | Shisa5   | 0.846977 | 5 |
| ENSMUSG00000003970 | Rpl8     | 0.84561  | 5 |
| ENSMUSG00000062997 | Rpl35    | 0.843366 | 5 |
| ENSMUSG00000041453 | Rpl21    | 0.842797 | 5 |
| ENSMUSG00000062328 | Rpl17    | 0.842391 | 5 |
| ENSMUSG00000025290 | Rps24    | 0.842359 | 5 |
| ENSMUSG00000038274 | Fau      | 0.841375 | 5 |
| ENSMUSG00000063457 | Rps15    | 0.835695 | 5 |
| ENSMUSG00000032399 | Rpl4     | 0.832817 | 5 |
| ENSMUSG00000064370 | mt-Cytb  | 0.831495 | 5 |
| ENSMUSG00000058470 | Gm8369   | 0.831226 | 5 |
| ENSMUSG00000036478 | Btg1     | 0.829    | 5 |
| ENSMUSG00000046330 | Rpl37a   | 0.826996 | 5 |
| ENSMUSG00000037563 | Rps16    | 0.823466 | 5 |
| ENSMUSG00000064354 | mt-Co2   | 0.821598 | 5 |
| ENSMUSG00000090862 | Rps13    | 0.820653 | 5 |
| ENSMUSG00000058546 | Rpl23a   | 0.820234 | 5 |
| ENSMUSG00000062006 | Rpl34    | 0.819585 | 5 |
| ENSMUSG00000008668 | Rps18    | 0.812743 | 5 |
| ENSMUSG00000028081 | Rps3a1   | 0.812378 | 5 |
| ENSMUSG00000079641 | Rpl39    | 0.810747 | 5 |
| ENSMUSG00000012848 | Rps5     | 0.807799 | 5 |
| ENSMUSG00000093674 | Rpl41    | 0.806946 | 5 |
| ENSMUSG00000034892 | Rps29    | 0.805262 | 5 |
| ENSMUSG00000020719 | Ddx5     | 0.803158 | 5 |
| ENSMUSG00000028495 | Rps6     | 0.800708 | 5 |
| ENSMUSG00000055148 | Klf2     | 0.799276 | 5 |
| ENSMUSG00000038900 | Rpl12    | 0.799    | 5 |
| ENSMUSG00000030744 | Rps3     | 0.792683 | 5 |
| ENSMUSG00000057863 | Rpl36    | 0.792338 | 5 |
| ENSMUSG00000041841 | Rpl37    | 0.791832 | 5 |

|                    |           |          |   |
|--------------------|-----------|----------|---|
| ENSMUSG00000025508 | Rplp2     | 0.791193 | 5 |
| ENSMUSG00000067288 | Rps28     | 0.790854 | 5 |
| ENSMUSG00000057322 | Rpl38     | 0.789317 | 5 |
| ENSMUSG00000071076 | Jund      | 0.786839 | 5 |
| ENSMUSG00000060636 | Rpl35a    | 0.786778 | 5 |
| ENSMUSG00000047675 | Rps8      | 0.784629 | 5 |
| ENSMUSG00000046364 | Rpl27a    | 0.783918 | 5 |
| ENSMUSG00000064341 | mt-Nd1    | 0.77984  | 5 |
| ENSMUSG00000060938 | Rpl26     | 0.777191 | 5 |
| ENSMUSG00000057841 | Rpl32     | 0.776129 | 5 |
| ENSMUSG00000025794 | Rpl14     | 0.774958 | 5 |
| ENSMUSG00000090137 | Uba52     | 0.773688 | 5 |
| ENSMUSG00000049517 | Rps23     | 0.771516 | 5 |
| ENSMUSG00000071415 | Rpl23     | 0.771126 | 5 |
| ENSMUSG00000026238 | Ptma      | 0.766507 | 5 |
| ENSMUSG00000044533 | Rps2      | 0.76469  | 5 |
| ENSMUSG00000024608 | Rps14     | 0.763522 | 5 |
| ENSMUSG00000024353 | Mzb1      | 0.762888 | 5 |
| ENSMUSG00000047139 | Cd24a     | 0.76142  | 5 |
| ENSMUSG00000031320 | Rps4x     | 0.757631 | 5 |
| ENSMUSG00000032518 | Rpsa      | 0.75205  | 5 |
| ENSMUSG00000073702 | Rpl31     | 0.750505 | 5 |
| ENSMUSG00000022205 | Sub1      | 0.749649 | 5 |
| ENSMUSG00000064363 | mt-Nd4    | 0.739044 | 5 |
| ENSMUSG00000092341 | Malat1    | 0.732298 | 5 |
| ENSMUSG00000006333 | Rps9      | 0.72828  | 5 |
| ENSMUSG00000030156 | Cd69      | 0.717562 | 5 |
| ENSMUSG00000037742 | Eef1a1    | 0.715273 | 5 |
| ENSMUSG00000067274 | Rplp0     | 0.713872 | 5 |
| ENSMUSG00000061787 | Rps17     | 0.71188  | 5 |
| ENSMUSG00000016559 | H3f3b     | 0.688559 | 5 |
| ENSMUSG00000015396 | Cd83      | 0.686277 | 5 |
| ENSMUSG00000061983 | Rps12     | 0.678124 | 5 |
| ENSMUSG00000027368 | Dusp2     | 0.667522 | 5 |
| ENSMUSG00000049422 | Chchd10   | 0.652847 | 5 |
| ENSMUSG00000060143 | Gm10076   | 0.652241 | 5 |
| ENSMUSG00000000903 | Vpreb3    | 0.651351 | 5 |
| ENSMUSG00000044734 | Serpinb1a | 0.640196 | 5 |
| ENSMUSG00000066551 | Hmgb1     | 0.640032 | 5 |
| ENSMUSG00000040435 | Ppp1r15a  | 0.630539 | 5 |
| ENSMUSG00000086503 | Xist      | 0.58572  | 5 |
| ENSMUSG00000021701 | Plk2      | 0.565996 | 5 |
| ENSMUSG00000036181 | Hist1h1c  | 0.557838 | 5 |
| ENSMUSG00000047281 | Sfn       | 0.552997 | 5 |
| ENSMUSG00000090223 | Pcp4      | 0.505267 | 5 |
| ENSMUSG00000051079 | Rgs13     | 0.504868 | 5 |
| ENSMUSG00000002033 | Cd3g      | 0.934412 | 6 |
| ENSMUSG00000032094 | Cd3d      | 0.916801 | 6 |
| ENSMUSG00000032011 | Thy1      | 0.878962 | 6 |
| ENSMUSG00000030742 | Lat       | 0.864963 | 6 |
| ENSMUSG00000032093 | Cd3e      | 0.858563 | 6 |
| ENSMUSG00000026012 | Cd28      | 0.84762  | 6 |
| ENSMUSG00000064109 | Hcst      | 0.843777 | 6 |
| ENSMUSG00000079523 | Tmsb10    | 0.84317  | 6 |
| ENSMUSG00000000409 | Lck       | 0.837011 | 6 |
| ENSMUSG00000056290 | Ms4a4b    | 0.823474 | 6 |
| ENSMUSG00000033220 | Rac2      | 0.817246 | 6 |
| ENSMUSG00000060550 | H2-Q7     | 0.803985 | 6 |
| ENSMUSG00000024399 | Ltb       | 0.801508 | 6 |

|                     |               |          |   |
|---------------------|---------------|----------|---|
| ENSMUSG00000047867  | Gimap6        | 0.78718  | 6 |
| ENSMUSG00000054435  | Gimap4        | 0.777665 | 6 |
| ENSMUSG00000066278  | Vps37b        | 0.767623 | 6 |
| ENSMUSG00000048521  | Cxcr6         | 0.760894 | 6 |
| ENSMUSG00000027863  | Cd2           | 0.753129 | 6 |
| ENSMUSG00000041959  | S100a10       | 0.748185 | 6 |
| ENSMUSG00000026009  | Icos          | 0.718733 | 6 |
| ENSMUSG00000044258  | Ctla2a        | 0.693897 | 6 |
| ENSMUSG00000061232  | H2-K1         | 0.686923 | 6 |
| ENSMUSG00000032238  | Rora          | 0.6862   | 6 |
| ENSMUSG00000007892  | Rplp1         | 0.682621 | 6 |
| ENSMUSG00000071866  | Ppia          | 0.67404  | 6 |
| ENSMUSG00000045817  | Zfp3612       | 0.673714 | 6 |
| ENSMUSG00000060126  | Tpt1          | 0.672592 | 6 |
| ENSMUSG00000022018  | Rgcc          | 0.649668 | 6 |
| ENSMUSG00000015619  | Gata3         | 0.644037 | 6 |
| ENSMUSG00000052837  | Junb          | 0.641141 | 6 |
| ENSMUSG00000075602  | Ly6a          | 0.638196 | 6 |
| ENSMUSG00000053044  | Cd8b1         | 0.620122 | 6 |
| ENSMUSG00000053977  | Cd8a          | 0.601785 | 6 |
| ENSMUSG00000048376  | F2r           | 0.594574 | 6 |
| ENSMUSG00000086320  | Gm12840       | 0.594468 | 6 |
| ENSMUSG000000106874 | NA            | 0.589567 | 6 |
| ENSMUSG00000033307  | Mif           | 0.588532 | 6 |
| ENSMUSG00000028410  | Dnaja1        | 0.588155 | 6 |
| ENSMUSG00000054717  | Hmgb2         | 0.585366 | 6 |
| ENSMUSG00000026011  | Ctla4         | 0.576976 | 6 |
| ENSMUSG00000025997  | Ikzf2         | 0.570131 | 6 |
| ENSMUSG00000031933  | Folr4         | 0.568896 | 6 |
| ENSMUSG00000067613  | 5430421N21Rik | 0.557549 | 6 |
| ENSMUSG00000022015  | Tnfsf11       | 0.55522  | 6 |
| ENSMUSG00000026989  | Dapl1         | 0.551841 | 6 |
| ENSMUSG00000026285  | Pdcd1         | 0.55153  | 6 |
| ENSMUSG00000000869  | Il4           | 0.550323 | 6 |
| ENSMUSG00000024065  | Ehd3          | 0.546647 | 6 |
| ENSMUSG00000029075  | Tnfrsf4       | 0.54378  | 6 |
| ENSMUSG00000026475  | Rgs16         | 0.543326 | 6 |
| ENSMUSG00000042385  | Gzmk          | 0.539097 | 6 |
| ENSMUSG00000028362  | Tnfsf8        | 0.535589 | 6 |
| ENSMUSG00000079018  | Ly6c1         | 0.533847 | 6 |
| ENSMUSG00000018916  | Csf2          | 0.53342  | 6 |
| ENSMUSG00000030669  | Calca         | 0.518359 | 6 |
| ENSMUSG00000025929  | Il17a         | 0.517123 | 6 |
| ENSMUSG00000029875  | Al836003      | 0.511872 | 6 |
| ENSMUSG00000020702  | Ccl1          | 0.510802 | 6 |
| ENSMUSG00000025461  | Cd163l1       | 0.510793 | 6 |
| ENSMUSG00000020383  | Il13          | 0.509188 | 6 |
| ENSMUSG00000051225  | Fam83a        | 0.508557 | 6 |
| ENSMUSG00000041872  | Il17f         | 0.504595 | 6 |
| ENSMUSG00000036117  | Il5           | 0.503598 | 6 |
| ENSMUSG00000074695  | Il22          | 0.503374 | 6 |
| ENSMUSG00000045573  | Penk          | 0.501455 | 6 |
| ENSMUSG00000035557  | Krt17         | 0.500992 | 6 |
| ENSMUSG00000029151  | Slc30a3       | 0.500348 | 6 |
| ENSMUSG00000018819  | Lsp1          | 0.89868  | 7 |
| ENSMUSG00000031494  | Cd209a        | 0.891715 | 7 |
| ENSMUSG00000031838  | Ifi30         | 0.87975  | 7 |
| ENSMUSG00000001020  | S100a4        | 0.871674 | 7 |
| ENSMUSG00000002204  | Napsa         | 0.86798  | 7 |

|                    |           |          |   |
|--------------------|-----------|----------|---|
| ENSMUSG00000006360 | Crip1     | 0.855322 | 7 |
| ENSMUSG00000026728 | Vim       | 0.852862 | 7 |
| ENSMUSG00000048277 | Syngn2    | 0.85067  | 7 |
| ENSMUSG00000001025 | S100a6    | 0.844812 | 7 |
| ENSMUSG00000044162 | Tnip3     | 0.844233 | 7 |
| ENSMUSG00000027907 | S100a11   | 0.830865 | 7 |
| ENSMUSG00000030103 | Bhlhe40   | 0.820413 | 7 |
| ENSMUSG00000037894 | H2afz     | 0.816569 | 7 |
| ENSMUSG00000000594 | Gm2a      | 0.804866 | 7 |
| ENSMUSG00000001128 | Cfp       | 0.80466  | 7 |
| ENSMUSG00000032231 | Anxa2     | 0.801368 | 7 |
| ENSMUSG00000000318 | Clec10a   | 0.797395 | 7 |
| ENSMUSG00000035678 | Tnfsf9    | 0.794386 | 7 |
| ENSMUSG00000018821 | Avpi1     | 0.792984 | 7 |
| ENSMUSG00000060591 | Ifitm2    | 0.777529 | 7 |
| ENSMUSG00000049775 | Tmsb4x    | 0.769753 | 7 |
| ENSMUSG00000021025 | Nfkbia    | 0.737218 | 7 |
| ENSMUSG00000024334 | H2-Oa     | 0.73624  | 7 |
| ENSMUSG00000026547 | Tagln2    | 0.734319 | 7 |
| ENSMUSG00000037649 | H2-DMa    | 0.716199 | 7 |
| ENSMUSG00000003429 | Rps11     | 0.712243 | 7 |
| ENSMUSG00000001270 | Ckb       | 0.708771 | 7 |
| ENSMUSG00000024675 | Ms4a4c    | 0.708185 | 7 |
| ENSMUSG00000023067 | Cdkn1a    | 0.706696 | 7 |
| ENSMUSG00000024014 | Pim1      | 0.705265 | 7 |
| ENSMUSG00000036781 | Rps27l    | 0.697837 | 7 |
| ENSMUSG00000030432 | Rpl28     | 0.697751 | 7 |
| ENSMUSG00000029580 | Actb      | 0.697647 | 7 |
| ENSMUSG00000099974 | NA        | 0.697157 | 7 |
| ENSMUSG00000030208 | Emp1      | 0.660715 | 7 |
| ENSMUSG00000076441 | Ass1      | 0.658849 | 7 |
| ENSMUSG00000000531 | Grasp     | 0.657135 | 7 |
| ENSMUSG00000033083 | Tbc1d4    | 0.655451 | 7 |
| ENSMUSG00000023004 | Tuba1b    | 0.62691  | 7 |
| ENSMUSG00000031779 | Ccl22     | 0.623932 | 7 |
| ENSMUSG00000031827 | Cotl1     | 0.622789 | 7 |
| ENSMUSG00000001525 | Tubb5     | 0.616014 | 7 |
| ENSMUSG00000050912 | Tmem123   | 0.604685 | 7 |
| ENSMUSG00000001627 | lfrd1     | 0.603294 | 7 |
| ENSMUSG00000074141 | Il4i1     | 0.59959  | 7 |
| ENSMUSG00000031495 | Cd209d    | 0.588691 | 7 |
| ENSMUSG00000029430 | Ran       | 0.580836 | 7 |
| ENSMUSG00000003814 | Calr      | 0.575369 | 7 |
| ENSMUSG00000053560 | Ier2      | 0.554698 | 7 |
| ENSMUSG00000029581 | Fscn1     | 0.550538 | 7 |
| ENSMUSG00000041046 | Ramp3     | 0.545039 | 7 |
| ENSMUSG00000030605 | Mfge8     | 0.542817 | 7 |
| ENSMUSG00000013584 | Aldh1a2   | 0.539639 | 7 |
| ENSMUSG00000003352 | Cacnb3    | 0.537183 | 7 |
| ENSMUSG00000046733 | Gprc5a    | 0.535726 | 7 |
| ENSMUSG00000028100 | Nudt17    | 0.534529 | 7 |
| ENSMUSG00000074476 | Spc24     | 0.528015 | 7 |
| ENSMUSG00000004296 | Il12b     | 0.524366 | 7 |
| ENSMUSG00000019489 | Cd70      | 0.519382 | 7 |
| ENSMUSG00000039519 | Cyp7b1    | 0.51804  | 7 |
| ENSMUSG00000044309 | Apol7c    | 0.51752  | 7 |
| ENSMUSG00000021367 | Edn1      | 0.516286 | 7 |
| ENSMUSG00000069272 | Hist1h2ae | 0.514815 | 7 |
| ENSMUSG00000040197 | Cd209e    | 0.512052 | 7 |

|                    |            |          |   |
|--------------------|------------|----------|---|
| ENSMUSG00000022548 | Apod       | 0.510909 | 7 |
| ENSMUSG00000036578 | Fxyd7      | 0.510673 | 7 |
| ENSMUSG00000086862 | Gm13546    | 0.510421 | 7 |
| ENSMUSG00000024990 | Rbp4       | 0.503631 | 7 |
| ENSMUSG00000021490 | Slc34a1    | 0.503595 | 7 |
| ENSMUSG00000049436 | Upk1b      | 0.503404 | 7 |
| ENSMUSG00000078795 | Ceacam15   | 0.503233 | 7 |
| ENSMUSG00000033765 | Calm4      | 0.502647 | 7 |
| ENSMUSG00000079162 | Trim43b    | 0.500397 | 7 |
| ENSMUSG00000004612 | Nkg7       | 0.818131 | 8 |
| ENSMUSG00000030165 | Klrd1      | 0.816996 | 8 |
| ENSMUSG00000025163 | Cd7        | 0.799569 | 8 |
| ENSMUSG00000030149 | Klrk1      | 0.795719 | 8 |
| ENSMUSG00000035042 | Ccl5       | 0.792748 | 8 |
| ENSMUSG00000024910 | Ctsw       | 0.786281 | 8 |
| ENSMUSG00000062524 | Ncr1       | 0.78289  | 8 |
| ENSMUSG00000075010 | AW112010   | 0.781075 | 8 |
| ENSMUSG00000030325 | Klrb1c     | 0.780606 | 8 |
| ENSMUSG00000045826 | Ptprcap    | 0.775549 | 8 |
| ENSMUSG00000050241 | Klre1      | 0.772733 | 8 |
| ENSMUSG00000068220 | Lgals1     | 0.769033 | 8 |
| ENSMUSG00000026576 | Atp1b1     | 0.760814 | 8 |
| ENSMUSG00000054892 | Txk        | 0.749954 | 8 |
| ENSMUSG00000023132 | Gzma       | 0.73326  | 8 |
| ENSMUSG00000045827 | Serpinb9   | 0.72163  | 8 |
| ENSMUSG00000028214 | Gem        | 0.719923 | 8 |
| ENSMUSG00000026573 | Xcl1       | 0.717598 | 8 |
| ENSMUSG00000041515 | Irf8       | 0.710071 | 8 |
| ENSMUSG00000042842 | Serpinb6b  | 0.708894 | 8 |
| ENSMUSG00000015437 | Gzmb       | 0.703064 | 8 |
| ENSMUSG00000055170 | Ifng       | 0.676172 | 8 |
| ENSMUSG00000022114 | Spry2      | 0.665376 | 8 |
| ENSMUSG00000033024 | Klra9      | 0.663838 | 8 |
| ENSMUSG00000027562 | Car2       | 0.661988 | 8 |
| ENSMUSG00000030167 | Klrc1      | 0.660127 | 8 |
| ENSMUSG00000089727 | Klra8      | 0.642516 | 8 |
| ENSMUSG00000050075 | Gpr171     | 0.636832 | 8 |
| ENSMUSG00000067599 | Klra7      | 0.619358 | 8 |
| ENSMUSG00000079852 | Klra4      | 0.618828 | 8 |
| ENSMUSG00000022010 | Tsc22d1    | 0.614535 | 8 |
| ENSMUSG00000020644 | Id2        | 0.611825 | 8 |
| ENSMUSG00000026826 | Nr4a2      | 0.611162 | 8 |
| ENSMUSG00000022225 | Cma1       | 0.606044 | 8 |
| ENSMUSG00000030785 | Cox6a2     | 0.588467 | 8 |
| ENSMUSG00000051504 | Siglech    | 0.587416 | 8 |
| ENSMUSG00000032278 | Paqr5      | 0.587345 | 8 |
| ENSMUSG00000095514 | D13Ert608e | 0.585971 | 8 |
| ENSMUSG00000070803 | Cited4     | 0.581908 | 8 |
| ENSMUSG00000029530 | Ccr9       | 0.581218 | 8 |
| ENSMUSG00000041481 | Serpina3g  | 0.58019  | 8 |
| ENSMUSG00000032216 | Nedd4      | 0.580068 | 8 |
| ENSMUSG00000058728 | Cd300c     | 0.580041 | 8 |
| ENSMUSG00000067591 | Klra3      | 0.577876 | 8 |
| ENSMUSG00000063903 | Klk1       | 0.57715  | 8 |
| ENSMUSG00000048442 | Smim5      | 0.574719 | 8 |
| ENSMUSG00000030114 | Klrg1      | 0.574149 | 8 |
| ENSMUSG00000028965 | Tnfrsf9    | 0.570273 | 8 |
| ENSMUSG00000030616 | Sytl2      | 0.564047 | 8 |
| ENSMUSG00000036752 | Tubb4b     | 0.561513 | 8 |



|                    |               |          |   |
|--------------------|---------------|----------|---|
| ENSMUSG00000070436 | Serpinh1      | 0.55499  | 8 |
| ENSMUSG00000040405 | Havcr1        | 0.549219 | 8 |
| ENSMUSG00000053310 | Nrgn          | 0.549064 | 8 |
| ENSMUSG00000030246 | Ldhb          | 0.546689 | 8 |
| ENSMUSG00000033295 | Ptprf         | 0.545737 | 8 |
| ENSMUSG00000063177 | Klk1b27       | 0.542309 | 8 |
| ENSMUSG00000063450 | Syne2         | 0.541782 | 8 |
| ENSMUSG00000076431 | Sox4          | 0.540958 | 8 |
| ENSMUSG00000021760 | Gpx8          | 0.538333 | 8 |
| ENSMUSG00000021696 | Elovl7        | 0.538018 | 8 |
| ENSMUSG00000074457 | S100a16       | 0.536639 | 8 |
| ENSMUSG00000020044 | Timp3         | 0.535963 | 8 |
| ENSMUSG00000042784 | Muc1          | 0.535943 | 8 |
| ENSMUSG00000032372 | Plscr2        | 0.534791 | 8 |
| ENSMUSG00000079853 | Klra1         | 0.534352 | 8 |
| ENSMUSG00000028392 | Bspry         | 0.534337 | 8 |
| ENSMUSG00000002980 | Bcam          | 0.533175 | 8 |
| ENSMUSG00000001435 | Col18a1       | 0.533003 | 8 |
| ENSMUSG00000015094 | Npdc1         | 0.532916 | 8 |
| ENSMUSG00000037712 | Fermt2        | 0.532825 | 8 |
| ENSMUSG00000031871 | Cdh5          | 0.532698 | 8 |
| ENSMUSG00000031785 | Gpr56         | 0.531747 | 8 |
| ENSMUSG00000014329 | Bicc1         | 0.530983 | 8 |
| ENSMUSG00000006356 | Crip2         | 0.530762 | 8 |
| ENSMUSG00000022893 | Adamts1       | 0.530706 | 8 |
| ENSMUSG00000021403 | Serpinb9b     | 0.530336 | 8 |
| ENSMUSG00000020475 | Pgam2         | 0.530201 | 8 |
| ENSMUSG00000039474 | Wfs1          | 0.530117 | 8 |
| ENSMUSG00000020098 | Pcbd1         | 0.529955 | 8 |
| ENSMUSG00000008575 | Nfib          | 0.529636 | 8 |
| ENSMUSG00000031502 | Col4a1        | 0.529275 | 8 |
| ENSMUSG00000031881 | Cdh16         | 0.528782 | 8 |
| ENSMUSG00000021678 | F2rl1         | 0.528347 | 8 |
| ENSMUSG00000031078 | Ctnn          | 0.528245 | 8 |
| ENSMUSG00000028517 | Ppap2b        | 0.528167 | 8 |
| ENSMUSG00000096956 | 0610007N19Rik | 0.527653 | 8 |
| ENSMUSG00000022037 | Clu           | 0.526919 | 8 |
| ENSMUSG00000031503 | Col4a2        | 0.526899 | 8 |
| ENSMUSG00000028763 | Hspg2         | 0.526706 | 8 |
| ENSMUSG00000024538 | Ppic          | 0.52654  | 8 |
| ENSMUSG00000022323 | Hrsp12        | 0.526504 | 8 |
| ENSMUSG00000022261 | Sdc2          | 0.526311 | 8 |
| ENSMUSG00000036256 | Igfbp7        | 0.526128 | 8 |
| ENSMUSG00000027803 | Wwtr1         | 0.526052 | 8 |
| ENSMUSG00000020875 | Hoxb9         | 0.525724 | 8 |
| ENSMUSG00000032060 | Cryab         | 0.525454 | 8 |
| ENSMUSG00000041120 | Nbl1          | 0.525402 | 8 |
| ENSMUSG00000004044 | Ptrf          | 0.52523  | 8 |
| ENSMUSG00000030770 | Parva         | 0.525158 | 8 |
| ENSMUSG00000002900 | Lamb1         | 0.525088 | 8 |
| ENSMUSG00000038721 | Hoxb7         | 0.525067 | 8 |
| ENSMUSG00000037060 | Prkcdbp       | 0.524888 | 8 |
| ENSMUSG00000028776 | Tinagl1       | 0.524737 | 8 |
| ENSMUSG00000002565 | Scin          | 0.524734 | 8 |
| ENSMUSG00000000159 | Igsf5         | 0.524731 | 8 |
| ENSMUSG00000028716 | Pdzk1ip1      | 0.524667 | 8 |
| ENSMUSG00000069601 | Ank3          | 0.524582 | 8 |
| ENSMUSG00000022505 | Emp2          | 0.524565 | 8 |
| ENSMUSG00000039405 | Prss23        | 0.524392 | 8 |

|                    |               |          |   |
|--------------------|---------------|----------|---|
| ENSMUSG0000001864  | Aif1l         | 0.524147 | 8 |
| ENSMUSG00000049382 | Krt8          | 0.524126 | 8 |
| ENSMUSG00000070473 | Cldn3         | 0.523402 | 8 |
| ENSMUSG00000029761 | Cald1         | 0.523121 | 8 |
| ENSMUSG00000056313 | 1810011O10Rik | 0.522991 | 8 |
| ENSMUSG00000021850 | 1700011H14Rik | 0.522931 | 8 |
| ENSMUSG00000034127 | Tspan8        | 0.522896 | 8 |
| ENSMUSG00000043760 | Pkhd1         | 0.522889 | 8 |
| ENSMUSG00000026566 | Mpzl1         | 0.522756 | 8 |
| ENSMUSG00000022865 | Cxadr         | 0.522752 | 8 |
| ENSMUSG00000041889 | Shisa4        | 0.522678 | 8 |
| ENSMUSG00000001240 | Ramp2         | 0.522626 | 8 |
| ENSMUSG00000021662 | Arhgef28      | 0.522623 | 8 |
| ENSMUSG00000044279 | Crb3          | 0.52259  | 8 |
| ENSMUSG00000024232 | Bambi         | 0.522488 | 8 |
| ENSMUSG00000078350 | Smim1         | 0.522485 | 8 |
| ENSMUSG00000018569 | Cldn7         | 0.522353 | 8 |
| ENSMUSG00000026976 | Pax8          | 0.522127 | 8 |
| ENSMUSG00000028780 | Sema3c        | 0.52209  | 8 |
| ENSMUSG00000041936 | Agrn          | 0.522064 | 8 |
| ENSMUSG00000031538 | Plat          | 0.522045 | 8 |
| ENSMUSG00000000690 | Hoxb6         | 0.52201  | 8 |
| ENSMUSG00000047040 | Prr15l        | 0.521898 | 8 |
| ENSMUSG00000035910 | Dcdc2a        | 0.52183  | 8 |
| ENSMUSG00000051497 | Kcnj16        | 0.521767 | 8 |
| ENSMUSG00000029086 | Prom1         | 0.521714 | 8 |
| ENSMUSG00000070047 | Fat1          | 0.521694 | 8 |
| ENSMUSG00000027954 | Efna1         | 0.521677 | 8 |
| ENSMUSG00000047501 | Cldn4         | 0.521653 | 8 |
| ENSMUSG00000003051 | Elf3          | 0.52153  | 8 |
| ENSMUSG00000031750 | Ii34          | 0.521511 | 8 |
| ENSMUSG00000013076 | Amotl1        | 0.521493 | 8 |
| ENSMUSG00000018593 | Sparc         | 0.521443 | 8 |
| ENSMUSG00000026971 | Itgb6         | 0.521397 | 8 |
| ENSMUSG00000021745 | Ptprg         | 0.521377 | 8 |
| ENSMUSG00000017723 | Wfdc2         | 0.521334 | 8 |
| ENSMUSG00000023043 | Krt18         | 0.521333 | 8 |
| ENSMUSG00000027375 | Mal           | 0.521317 | 8 |
| ENSMUSG00000032548 | Slco2a1       | 0.521227 | 8 |
| ENSMUSG00000030551 | Nr2f2         | 0.520991 | 8 |
| ENSMUSG00000027993 | Trim2         | 0.520978 | 8 |
| ENSMUSG00000027800 | Tm4sf1        | 0.520895 | 8 |
| ENSMUSG00000007039 | Ddah2         | 0.520728 | 8 |
| ENSMUSG00000075588 | Hoxb2         | 0.520706 | 8 |
| ENSMUSG00000018849 | Wwc1          | 0.520687 | 8 |
| ENSMUSG00000039131 | Gipc2         | 0.520615 | 8 |
| ENSMUSG00000026380 | Tfcp2l1       | 0.520545 | 8 |
| ENSMUSG00000001827 | Folr1         | 0.520469 | 8 |
| ENSMUSG00000074364 | Ehd2          | 0.520408 | 8 |
| ENSMUSG00000027210 | Meis2         | 0.520363 | 8 |
| ENSMUSG00000015647 | Lama5         | 0.520277 | 8 |
| ENSMUSG00000032492 | Pth1r         | 0.520174 | 8 |
| ENSMUSG00000047907 | Tshz2         | 0.520157 | 8 |
| ENSMUSG00000025504 | Eps8l2        | 0.520089 | 8 |
| ENSMUSG00000014303 | Glis2         | 0.519892 | 8 |
| ENSMUSG00000030587 | 2200002D01Rik | 0.519872 | 8 |
| ENSMUSG00000001663 | Gstt1         | 0.519663 | 8 |
| ENSMUSG00000067158 | Col4a4        | 0.519581 | 8 |
| ENSMUSG00000040998 | Npnt          | 0.519542 | 8 |

|                    |               |          |   |
|--------------------|---------------|----------|---|
| ENSMUSG00000075420 | Smim6         | 0.519469 | 8 |
| ENSMUSG00000026249 | Serpine2      | 0.51936  | 8 |
| ENSMUSG00000029718 | Pcolce        | 0.519326 | 8 |
| ENSMUSG00000019889 | Ptprk         | 0.519269 | 8 |
| ENSMUSG00000030800 | Prss8         | 0.519194 | 8 |
| ENSMUSG00000037852 | Cpe           | 0.519193 | 8 |
| ENSMUSG00000027820 | Mme           | 0.519141 | 8 |
| ENSMUSG00000026604 | Ptpn14        | 0.519126 | 8 |
| ENSMUSG00000002504 | Slc9a3r2      | 0.519063 | 8 |
| ENSMUSG00000024501 | Dpysl3        | 0.518962 | 8 |
| ENSMUSG00000038781 | Stap2         | 0.518938 | 8 |
| ENSMUSG00000019779 | Frk           | 0.518898 | 8 |
| ENSMUSG00000015653 | Steap2        | 0.518862 | 8 |
| ENSMUSG00000022816 | Fstl1         | 0.51881  | 8 |
| ENSMUSG00000096215 | Smim22        | 0.51871  | 8 |
| ENSMUSG00000033998 | Kcnk1         | 0.518612 | 8 |
| ENSMUSG00000056648 | Hoxb8         | 0.518582 | 8 |
| ENSMUSG00000032232 | Cgnl1         | 0.518376 | 8 |
| ENSMUSG00000028357 | Kif12         | 0.518359 | 8 |
| ENSMUSG00000022231 | Sema5a        | 0.518351 | 8 |
| ENSMUSG00000055320 | Tead1         | 0.518225 | 8 |
| ENSMUSG00000073599 | Ecscr         | 0.518203 | 8 |
| ENSMUSG00000038587 | Akap12        | 0.518177 | 8 |
| ENSMUSG00000037736 | Limch1        | 0.518136 | 8 |
| ENSMUSG00000029070 | Mxra8         | 0.517999 | 8 |
| ENSMUSG00000026479 | Lamc2         | 0.517986 | 8 |
| ENSMUSG00000019851 | Perp          | 0.517856 | 8 |
| ENSMUSG00000022469 | Rapgef3       | 0.517848 | 8 |
| ENSMUSG00000029811 | Aoc1          | 0.517714 | 8 |
| ENSMUSG00000062563 | Cys1          | 0.517631 | 8 |
| ENSMUSG00000026278 | Bok           | 0.517621 | 8 |
| ENSMUSG00000068740 | Celsr2        | 0.51759  | 8 |
| ENSMUSG00000020674 | Pxdn          | 0.517541 | 8 |
| ENSMUSG00000028601 | Echdc2        | 0.51737  | 8 |
| ENSMUSG00000022894 | Adamts5       | 0.517352 | 8 |
| ENSMUSG00000033060 | Lmo7          | 0.517256 | 8 |
| ENSMUSG00000039349 | C130074G19Rik | 0.517067 | 8 |
| ENSMUSG00000023232 | Serinc2       | 0.51705  | 8 |
| ENSMUSG00000031119 | Gpc4          | 0.516923 | 8 |
| ENSMUSG00000052727 | Map1b         | 0.51676  | 8 |
| ENSMUSG00000079186 | Gzmc          | 0.516686 | 8 |
| ENSMUSG00000040562 | Gstm2         | 0.516629 | 8 |
| ENSMUSG00000020679 | Hnf1b         | 0.516513 | 8 |
| ENSMUSG00000023039 | Krt7          | 0.516463 | 8 |
| ENSMUSG00000022836 | Mylk          | 0.51638  | 8 |
| ENSMUSG00000027684 | Mecom         | 0.516087 | 8 |
| ENSMUSG00000028128 | F3            | 0.516085 | 8 |
| ENSMUSG00000051397 | Tacstd2       | 0.516041 | 8 |
| ENSMUSG00000021097 | Clmn          | 0.516029 | 8 |
| ENSMUSG00000032246 | Calml4        | 0.515862 | 8 |
| ENSMUSG00000046402 | Rbp1          | 0.515828 | 8 |
| ENSMUSG00000050520 | Cldn8         | 0.515771 | 8 |
| ENSMUSG00000049892 | Rasd1         | 0.515737 | 8 |
| ENSMUSG00000004231 | Pax2          | 0.515675 | 8 |
| ENSMUSG00000027102 | Hoxd8         | 0.515654 | 8 |
| ENSMUSG00000046818 | Ddit4l        | 0.515601 | 8 |
| ENSMUSG00000029762 | Akr1b8        | 0.515558 | 8 |
| ENSMUSG00000035104 | Eva1a         | 0.515524 | 8 |
| ENSMUSG00000045667 | Smtnl2        | 0.515503 | 8 |

|                    |               |          |   |
|--------------------|---------------|----------|---|
| ENSMUSG00000053886 | Sh2d4a        | 0.515468 | 8 |
| ENSMUSG00000031734 | Irx3          | 0.515437 | 8 |
| ENSMUSG00000020473 | Aebp1         | 0.515401 | 8 |
| ENSMUSG00000027356 | Fermt1        | 0.515265 | 8 |
| ENSMUSG00000079037 | Prnp          | 0.515206 | 8 |
| ENSMUSG00000020099 | Unc5b         | 0.515051 | 8 |
| ENSMUSG00000032068 | 1600029D21Rik | 0.515015 | 8 |
| ENSMUSG00000022665 | Ccdc80        | 0.515006 | 8 |
| ENSMUSG00000038600 | Atp6v0a4      | 0.514983 | 8 |
| ENSMUSG00000015090 | Ptgds         | 0.514979 | 8 |
| ENSMUSG00000039542 | Ncam1         | 0.514912 | 8 |
| ENSMUSG00000041782 | Lad1          | 0.514902 | 8 |
| ENSMUSG00000005148 | Klf5          | 0.514879 | 8 |
| ENSMUSG00000028194 | Ddah1         | 0.514786 | 8 |
| ENSMUSG00000021594 | Srd5a1        | 0.514768 | 8 |
| ENSMUSG00000000567 | Sox9          | 0.514616 | 8 |
| ENSMUSG00000024395 | Lims2         | 0.514485 | 8 |
| ENSMUSG00000054889 | Dsp           | 0.51437  | 8 |
| ENSMUSG00000029167 | Ppargc1a      | 0.514198 | 8 |
| ENSMUSG00000027536 | Chmp4c        | 0.514183 | 8 |
| ENSMUSG00000020467 | Efemp1        | 0.514147 | 8 |
| ENSMUSG00000000385 | Tmprss2       | 0.51409  | 8 |
| ENSMUSG00000054690 | Emcn          | 0.51404  | 8 |
| ENSMUSG00000025497 | Cdhr5         | 0.513925 | 8 |
| ENSMUSG00000047230 | Cldn2         | 0.513873 | 8 |
| ENSMUSG00000023959 | Clic5         | 0.513815 | 8 |
| ENSMUSG00000045515 | Pou3f3        | 0.513737 | 8 |
| ENSMUSG00000001300 | Efnb2         | 0.513719 | 8 |
| ENSMUSG00000028278 | Rragd         | 0.513703 | 8 |
| ENSMUSG00000026255 | Efhd1         | 0.513623 | 8 |
| ENSMUSG00000060961 | Slc4a4        | 0.513595 | 8 |
| ENSMUSG00000055653 | Gpc3          | 0.513568 | 8 |
| ENSMUSG00000029641 | Rasl11a       | 0.513511 | 8 |
| ENSMUSG00000055373 | Fut9          | 0.513492 | 8 |
| ENSMUSG00000020173 | Cobl          | 0.513477 | 8 |
| ENSMUSG00000026921 | Egfl7         | 0.513466 | 8 |
| ENSMUSG00000028755 | Cda           | 0.513428 | 8 |
| ENSMUSG00000029153 | Ociad2        | 0.513367 | 8 |
| ENSMUSG00000020911 | Krt19         | 0.513257 | 8 |
| ENSMUSG00000048332 | Lhfp          | 0.513225 | 8 |
| ENSMUSG00000023092 | Fhl1          | 0.513216 | 8 |
| ENSMUSG00000027314 | Dll4          | 0.51317  | 8 |
| ENSMUSG00000045954 | Sdpr          | 0.513145 | 8 |
| ENSMUSG00000024479 | Mal2          | 0.513086 | 8 |
| ENSMUSG00000039167 | Eltf1         | 0.513081 | 8 |
| ENSMUSG00000048572 | Tmem252       | 0.513066 | 8 |
| ENSMUSG00000024803 | Ankrd1        | 0.512924 | 8 |
| ENSMUSG00000052957 | Gas1          | 0.51288  | 8 |
| ENSMUSG00000000308 | Ckmt1         | 0.51288  | 8 |
| ENSMUSG00000010080 | Epn3          | 0.512878 | 8 |
| ENSMUSG00000061947 | Serpina10     | 0.512827 | 8 |
| ENSMUSG00000027859 | Ngf           | 0.512786 | 8 |
| ENSMUSG00000029829 | Tmem213       | 0.512625 | 8 |
| ENSMUSG00000057604 | Lmcd1         | 0.512587 | 8 |
| ENSMUSG00000035112 | Wnk4          | 0.51245  | 8 |
| ENSMUSG00000020154 | Ptprb         | 0.512382 | 8 |
| ENSMUSG00000029370 | Rassf6        | 0.512357 | 8 |
| ENSMUSG00000074207 | Adh1          | 0.512324 | 8 |
| ENSMUSG00000028713 | Cyp4b1        | 0.512306 | 8 |

|                    |               |          |   |
|--------------------|---------------|----------|---|
| ENSMUSG00000034295 | Fhod3         | 0.512282 | 8 |
| ENSMUSG00000097421 | D630011A20Rik | 0.512265 | 8 |
| ENSMUSG00000006205 | Htra1         | 0.512238 | 8 |
| ENSMUSG00000044748 | Defb1         | 0.512115 | 8 |
| ENSMUSG00000032357 | Tinag         | 0.512058 | 8 |
| ENSMUSG00000031990 | Jam3          | 0.511911 | 8 |
| ENSMUSG00000044337 | Ackr3         | 0.511728 | 8 |
| ENSMUSG00000079042 | Trim61        | 0.511669 | 8 |
| ENSMUSG00000056492 | Gpr116        | 0.511637 | 8 |
| ENSMUSG00000054871 | Tmem158       | 0.511627 | 8 |
| ENSMUSG00000063851 | Rnf183        | 0.511555 | 8 |
| ENSMUSG00000001946 | Esam          | 0.511514 | 8 |
| ENSMUSG00000070867 | Trabd2b       | 0.511507 | 8 |
| ENSMUSG00000029273 | Sult1d1       | 0.511451 | 8 |
| ENSMUSG00000019997 | Ctgf          | 0.511278 | 8 |
| ENSMUSG00000023122 | Sult1c2       | 0.511276 | 8 |
| ENSMUSG00000024924 | Vldlr         | 0.511239 | 8 |
| ENSMUSG00000062960 | Kdr           | 0.511234 | 8 |
| ENSMUSG00000044249 | Defb29        | 0.511221 | 8 |
| ENSMUSG00000040488 | Ltbp4         | 0.511168 | 8 |
| ENSMUSG00000050295 | Foxc1         | 0.511109 | 8 |
| ENSMUSG00000024140 | Epas1         | 0.511005 | 8 |
| ENSMUSG00000032334 | Loxl1         | 0.510998 | 8 |
| ENSMUSG00000022330 | Osr2          | 0.510984 | 8 |
| ENSMUSG00000072941 | Sod3          | 0.510961 | 8 |
| ENSMUSG00000042115 | Klhdc8a       | 0.51096  | 8 |
| ENSMUSG00000062312 | ErbB2         | 0.510942 | 8 |
| ENSMUSG00000085645 | 0610040B09Rik | 0.510921 | 8 |
| ENSMUSG00000030498 | Gas2          | 0.510915 | 8 |
| ENSMUSG00000015401 | Tmem27        | 0.510892 | 8 |
| ENSMUSG00000032978 | Guca2b        | 0.51084  | 8 |
| ENSMUSG00000007655 | Cav1          | 0.510798 | 8 |
| ENSMUSG00000028167 | Bdh2          | 0.510771 | 8 |
| ENSMUSG00000033022 | Cdo1          | 0.51073  | 8 |
| ENSMUSG00000009281 | Rarres2       | 0.510695 | 8 |
| ENSMUSG00000046768 | Rhoj          | 0.510653 | 8 |
| ENSMUSG00000005397 | Nid1          | 0.510585 | 8 |
| ENSMUSG00000034845 | Plvap         | 0.510554 | 8 |
| ENSMUSG00000045725 | Prr15         | 0.510426 | 8 |
| ENSMUSG00000025608 | Podxl         | 0.510412 | 8 |
| ENSMUSG00000038298 | Pdzk1         | 0.5104   | 8 |
| ENSMUSG00000025196 | Cpn1          | 0.510384 | 8 |
| ENSMUSG00000041445 | Mmrn2         | 0.510333 | 8 |
| ENSMUSG00000015085 | Entpd2        | 0.510251 | 8 |
| ENSMUSG00000030074 | Gxylt2        | 0.51023  | 8 |
| ENSMUSG00000051669 | AU021092      | 0.510201 | 8 |
| ENSMUSG00000047638 | Nr1h4         | 0.510196 | 8 |
| ENSMUSG00000034161 | Scx           | 0.510086 | 8 |
| ENSMUSG00000015962 | 1700016C15Rik | 0.510054 | 8 |
| ENSMUSG00000039438 | Ttc36         | 0.509997 | 8 |
| ENSMUSG00000063683 | Glyat         | 0.509988 | 8 |
| ENSMUSG00000041134 | Cyrr1         | 0.509973 | 8 |
| ENSMUSG00000028699 | Tspan1        | 0.509918 | 8 |
| ENSMUSG00000039239 | Tgfb2         | 0.509861 | 8 |
| ENSMUSG00000027359 | Slc27a2       | 0.509837 | 8 |
| ENSMUSG00000022132 | Cldn10        | 0.509788 | 8 |
| ENSMUSG00000021749 | Oit1          | 0.509748 | 8 |
| ENSMUSG00000029309 | Sparcl1       | 0.509664 | 8 |
| ENSMUSG00000048960 | Prex2         | 0.509662 | 8 |

|                     |               |          |   |
|---------------------|---------------|----------|---|
| ENSMUSG00000026417  | Pigr          | 0.509636 | 8 |
| ENSMUSG00000034435  | Tmem30b       | 0.509617 | 8 |
| ENSMUSG00000033191  | Tie1          | 0.509584 | 8 |
| ENSMUSG00000045930  | Clec14a       | 0.509584 | 8 |
| ENSMUSG00000032327  | Stra6         | 0.50951  | 8 |
| ENSMUSG00000032418  | Me1           | 0.509493 | 8 |
| ENSMUSG00000040938  | Slc16a11      | 0.509394 | 8 |
| ENSMUSG00000015652  | Steap1        | 0.509377 | 8 |
| ENSMUSG00000022425  | Enpp2         | 0.509362 | 8 |
| ENSMUSG00000025927  | Tfap2b        | 0.509319 | 8 |
| ENSMUSG00000036169  | Sostdc1       | 0.50931  | 8 |
| ENSMUSG00000006386  | Tek           | 0.509304 | 8 |
| ENSMUSG00000010122  | Slc47a1       | 0.509209 | 8 |
| ENSMUSG00000024168  | Tmem204       | 0.509179 | 8 |
| ENSMUSG00000044646  | Zbtb7c        | 0.50917  | 8 |
| ENSMUSG00000024131  | Slc3a1        | 0.509153 | 8 |
| ENSMUSG00000026185  | Igfbp5        | 0.509114 | 8 |
| ENSMUSG00000031775  | Pllp          | 0.509077 | 8 |
| ENSMUSG00000017453  | Pipox         | 0.509063 | 8 |
| ENSMUSG00000028024  | Enpep         | 0.509041 | 8 |
| ENSMUSG00000025902  | Sox17         | 0.509006 | 8 |
| ENSMUSG00000021278  | Amn           | 0.508957 | 8 |
| ENSMUSG00000046470  | Sox18         | 0.508914 | 8 |
| ENSMUSG00000046056  | Sbsn          | 0.508904 | 8 |
| ENSMUSG00000039706  | Ldb2          | 0.508839 | 8 |
| ENSMUSG00000040413  | Timd2         | 0.508837 | 8 |
| ENSMUSG00000041248  | Kcnj1         | 0.508821 | 8 |
| ENSMUSG000000060572 | Mfap2         | 0.50882  | 8 |
| ENSMUSG00000010435  | Spaca7        | 0.508816 | 8 |
| ENSMUSG00000078234  | Klhdc7a       | 0.508798 | 8 |
| ENSMUSG000000031891 | Hsd11b2       | 0.508787 | 8 |
| ENSMUSG000000089804 | Gm16136       | 0.508779 | 8 |
| ENSMUSG00000029700  | Slc13a1       | 0.508638 | 8 |
| ENSMUSG00000024694  | Keg1          | 0.508558 | 8 |
| ENSMUSG00000026730  | Pter          | 0.508528 | 8 |
| ENSMUSG00000006216  | Clcnkb        | 0.508525 | 8 |
| ENSMUSG00000029188  | Slc34a2       | 0.508518 | 8 |
| ENSMUSG00000015053  | Gata2         | 0.508502 | 8 |
| ENSMUSG00000038521  | C1s           | 0.508502 | 8 |
| ENSMUSG000000060459 | Kng2          | 0.508501 | 8 |
| ENSMUSG000000050359 | Sprr1a        | 0.508482 | 8 |
| ENSMUSG00000027831  | Veph1         | 0.508481 | 8 |
| ENSMUSG000000052520 | Cyp2j5        | 0.508372 | 8 |
| ENSMUSG00000023914  | Mep1a         | 0.508355 | 8 |
| ENSMUSG000000050730 | Arhgap42      | 0.508351 | 8 |
| ENSMUSG00000024866  | Acy3          | 0.508278 | 8 |
| ENSMUSG000000052921 | Arhgef15      | 0.508278 | 8 |
| ENSMUSG00000026167  | Wnt10a        | 0.508243 | 8 |
| ENSMUSG000000055312 | 0610012H03Rik | 0.508221 | 8 |
| ENSMUSG000000058488 | Kl            | 0.508201 | 8 |
| ENSMUSG00000039865  | Slc44a3       | 0.508164 | 8 |
| ENSMUSG00000046916  | Myct1         | 0.50811  | 8 |
| ENSMUSG00000029675  | Eln           | 0.508073 | 8 |
| ENSMUSG00000027870  | Hao2          | 0.508057 | 8 |
| ENSMUSG00000025475  | Gpr123        | 0.508054 | 8 |
| ENSMUSG000000050071 | Bex1          | 0.508052 | 8 |
| ENSMUSG00000046082  | Tmem174       | 0.508018 | 8 |
| ENSMUSG000000031841 | Cdh13         | 0.507977 | 8 |
| ENSMUSG000000034911 | Ushbp1        | 0.507944 | 8 |

|                     |          |          |   |
|---------------------|----------|----------|---|
| ENSMUSG0000001739   | Cldn15   | 0.507776 | 8 |
| ENSMUSG00000026062  | Slc9a2   | 0.507772 | 8 |
| ENSMUSG00000030173  | Klra5    | 0.507737 | 8 |
| ENSMUSG00000022382  | Wnt7b    | 0.507736 | 8 |
| ENSMUSG00000022219  | Cideb    | 0.507683 | 8 |
| ENSMUSG00000025075  | Habp2    | 0.507661 | 8 |
| ENSMUSG00000027690  | Slc2a2   | 0.507624 | 8 |
| ENSMUSG00000001520  | Nrip2    | 0.507606 | 8 |
| ENSMUSG00000026208  | Des      | 0.507595 | 8 |
| ENSMUSG000000060969 | Irx1     | 0.507494 | 8 |
| ENSMUSG000000031558 | Slit2    | 0.507493 | 8 |
| ENSMUSG000000022040 | Ephx2    | 0.507331 | 8 |
| ENSMUSG000000004655 | Aqp1     | 0.507313 | 8 |
| ENSMUSG000000006269 | Atp6v1b1 | 0.507289 | 8 |
| ENSMUSG00000024558  | Mapk4    | 0.507269 | 8 |
| ENSMUSG00000025082  | Vwa2     | 0.507269 | 8 |
| ENSMUSG00000035775  | Krt20    | 0.507251 | 8 |
| ENSMUSG00000038146  | Notch3   | 0.507219 | 8 |
| ENSMUSG000000060402 | Chst8    | 0.507214 | 8 |
| ENSMUSG00000011263  | Exoc3l2  | 0.507201 | 8 |
| ENSMUSG00000025347  | Mettl7b  | 0.507142 | 8 |
| ENSMUSG000000049115 | Agtr1a   | 0.50714  | 8 |
| ENSMUSG00000029838  | Ptn      | 0.507053 | 8 |
| ENSMUSG00000023829  | Slc22a1  | 0.507032 | 8 |
| ENSMUSG00000021974  | Fgf9     | 0.507009 | 8 |
| ENSMUSG000000035566 | Pcdh17   | 0.507005 | 8 |
| ENSMUSG000000035540 | Gc       | 0.506975 | 8 |
| ENSMUSG00000026418  | Tnni1    | 0.50694  | 8 |
| ENSMUSG000000046623 | Gjb4     | 0.506916 | 8 |
| ENSMUSG000000032908 | Sgpp2    | 0.506841 | 8 |
| ENSMUSG000000062609 | Kcnj15   | 0.506806 | 8 |
| ENSMUSG000000050105 | Grrp1    | 0.506805 | 8 |
| ENSMUSG00000023064  | Sncg     | 0.506732 | 8 |
| ENSMUSG00000017950  | Hnf4a    | 0.506731 | 8 |
| ENSMUSG000000034687 | Fras1    | 0.506617 | 8 |
| ENSMUSG000000030873 | Scnn1b   | 0.50658  | 8 |
| ENSMUSG00000023073  | Slc10a2  | 0.506562 | 8 |
| ENSMUSG000000031980 | Agt      | 0.506543 | 8 |
| ENSMUSG000000006538 | Ihh      | 0.506506 | 8 |
| ENSMUSG000000053862 | Slc51b   | 0.50647  | 8 |
| ENSMUSG000000042306 | S100a14  | 0.50645  | 8 |
| ENSMUSG000000042371 | Slc5a10  | 0.506415 | 8 |
| ENSMUSG000000022579 | Gpihbp1  | 0.506404 | 8 |
| ENSMUSG000000001493 | Meox1    | 0.506378 | 8 |
| ENSMUSG000000021612 | Slc6a18  | 0.506376 | 8 |
| ENSMUSG000000028571 | Cyp2j13  | 0.506342 | 8 |
| ENSMUSG000000023019 | Gpd1     | 0.506265 | 8 |
| ENSMUSG000000041482 | Piezo2   | 0.506189 | 8 |
| ENSMUSG000000031517 | Gpm6a    | 0.506189 | 8 |
| ENSMUSG000000020839 | Tmigd1   | 0.506155 | 8 |
| ENSMUSG000000024810 | Ii33     | 0.50611  | 8 |
| ENSMUSG000000087006 | Gm13889  | 0.50609  | 8 |
| ENSMUSG00000001119  | Col6a1   | 0.50608  | 8 |
| ENSMUSG000000057163 | Prss2    | 0.506069 | 8 |
| ENSMUSG000000053062 | Jam2     | 0.506065 | 8 |
| ENSMUSG000000030945 | Acsm2    | 0.506064 | 8 |
| ENSMUSG00000001504  | Irx2     | 0.505965 | 8 |
| ENSMUSG000000044863 | Defb36   | 0.505965 | 8 |
| ENSMUSG000000032854 | Ugt8a    | 0.505946 | 8 |



|                    |          |          |   |
|--------------------|----------|----------|---|
| ENSMUSG00000041737 | Tmem45b  | 0.505931 | 8 |
| ENSMUSG00000021335 | Slc17a1  | 0.505913 | 8 |
| ENSMUSG00000027204 | Fbn1     | 0.505912 | 8 |
| ENSMUSG00000035186 | Ubd      | 0.505896 | 8 |
| ENSMUSG00000026042 | Col5a2   | 0.505854 | 8 |
| ENSMUSG00000031673 | Cdh11    | 0.505785 | 8 |
| ENSMUSG00000024620 | Pdgfrb   | 0.505777 | 8 |
| ENSMUSG00000062480 | Acat3    | 0.505761 | 8 |
| ENSMUSG00000066705 | Fxyd6    | 0.505733 | 8 |
| ENSMUSG00000042096 | Dao      | 0.50568  | 8 |
| ENSMUSG00000026175 | Vil1     | 0.505675 | 8 |
| ENSMUSG00000041237 | Pklr     | 0.505666 | 8 |
| ENSMUSG00000021186 | Fbln5    | 0.505659 | 8 |
| ENSMUSG00000057425 | Ugt2b37  | 0.505653 | 8 |
| ENSMUSG00000018604 | Tbx3     | 0.50563  | 8 |
| ENSMUSG00000062713 | Sim2     | 0.505629 | 8 |
| ENSMUSG00000028487 | Bnc2     | 0.505629 | 8 |
| ENSMUSG00000050866 | Clrn3    | 0.505592 | 8 |
| ENSMUSG00000024087 | Cyp1b1   | 0.505579 | 8 |
| ENSMUSG00000022206 | Npr3     | 0.505555 | 8 |
| ENSMUSG00000020241 | Col6a2   | 0.505537 | 8 |
| ENSMUSG00000057092 | Fxyd3    | 0.505537 | 8 |
| ENSMUSG00000042485 | Mustn1   | 0.505466 | 8 |
| ENSMUSG00000038370 | Pcp4l1   | 0.505445 | 8 |
| ENSMUSG00000002265 | Peg3     | 0.505407 | 8 |
| ENSMUSG00000030160 | Tmem52b  | 0.505389 | 8 |
| ENSMUSG00000006724 | Cyp27b1  | 0.505368 | 8 |
| ENSMUSG00000019577 | Pdk4     | 0.50535  | 8 |
| ENSMUSG00000026156 | B3gat2   | 0.505336 | 8 |
| ENSMUSG00000033726 | Emx1     | 0.505276 | 8 |
| ENSMUSG00000050234 | Gja4     | 0.505239 | 8 |
| ENSMUSG00000098087 | Gm17750  | 0.505238 | 8 |
| ENSMUSG00000066058 | Cldn19   | 0.505202 | 8 |
| ENSMUSG00000032125 | Robo4    | 0.505166 | 8 |
| ENSMUSG00000026394 | Atp6v1g3 | 0.505132 | 8 |
| ENSMUSG00000006403 | Adamts4  | 0.505128 | 8 |
| ENSMUSG00000030492 | Slc7a9   | 0.505128 | 8 |
| ENSMUSG00000028364 | Tnc      | 0.505111 | 8 |
| ENSMUSG00000050666 | Vstm4    | 0.505072 | 8 |
| ENSMUSG00000032348 | Gsta4    | 0.505039 | 8 |
| ENSMUSG00000021750 | Fam107a  | 0.505014 | 8 |
| ENSMUSG00000050074 | Spink8   | 0.505002 | 8 |
| ENSMUSG00000074261 | Gm7092   | 0.504998 | 8 |
| ENSMUSG00000026678 | Rgs5     | 0.504982 | 8 |
| ENSMUSG00000074653 | Lrrc31   | 0.504958 | 8 |
| ENSMUSG00000040732 | Erg      | 0.504926 | 8 |
| ENSMUSG00000016458 | Wt1      | 0.504922 | 8 |
| ENSMUSG00000026984 | Il1f6    | 0.504886 | 8 |
| ENSMUSG00000109093 | NA       | 0.504813 | 8 |
| ENSMUSG00000104445 | NA       | 0.504811 | 8 |
| ENSMUSG00000023906 | Cldn6    | 0.504753 | 8 |
| ENSMUSG00000038580 | Sct      | 0.504739 | 8 |
| ENSMUSG00000029335 | Bmp3     | 0.504716 | 8 |
| ENSMUSG00000041731 | Pgm5     | 0.504716 | 8 |
| ENSMUSG00000042357 | Gjb5     | 0.504679 | 8 |
| ENSMUSG00000031886 | Ces2e    | 0.504661 | 8 |
| ENSMUSG00000023886 | Smoc2    | 0.504648 | 8 |
| ENSMUSG00000019846 | Lama4    | 0.504605 | 8 |
| ENSMUSG00000066097 | Cyp2j11  | 0.504605 | 8 |

|                    |           |          |   |
|--------------------|-----------|----------|---|
| ENSMUSG00000052105 | Soga2     | 0.504549 | 8 |
| ENSMUSG00000000402 | Egfl6     | 0.504493 | 8 |
| ENSMUSG00000050737 | Ptges     | 0.504483 | 8 |
| ENSMUSG00000068196 | Col8a1    | 0.504458 | 8 |
| ENSMUSG00000061144 | Spink12   | 0.504418 | 8 |
| ENSMUSG00000014813 | Stc1      | 0.50438  | 8 |
| ENSMUSG00000079620 | Muc4      | 0.504325 | 8 |
| ENSMUSG00000071178 | Serpina1b | 0.504307 | 8 |
| ENSMUSG00000021456 | Fbp2      | 0.504306 | 8 |
| ENSMUSG00000016918 | Sulf1     | 0.504288 | 8 |
| ENSMUSG00000030549 | Rhcg      | 0.504251 | 8 |
| ENSMUSG00000020427 | Igfbp3    | 0.504223 | 8 |
| ENSMUSG00000026043 | Col3a1    | 0.504189 | 8 |
| ENSMUSG00000029231 | Pdgfra    | 0.504159 | 8 |
| ENSMUSG00000027386 | Fbln7     | 0.504141 | 8 |
| ENSMUSG00000048126 | Col6a3    | 0.504122 | 8 |
| ENSMUSG00000037206 | Islr      | 0.504104 | 8 |
| ENSMUSG00000063130 | Calml3    | 0.504101 | 8 |
| ENSMUSG00000018211 | Wfdc15b   | 0.504071 | 8 |
| ENSMUSG00000006522 | Itih3     | 0.504064 | 8 |
| ENSMUSG00000029659 | Medag     | 0.504064 | 8 |
| ENSMUSG00000031147 | Magix     | 0.504045 | 8 |
| ENSMUSG00000019894 | Slc6a15   | 0.504027 | 8 |
| ENSMUSG00000024529 | Lox       | 0.504011 | 8 |
| ENSMUSG00000027004 | Frzb      | 0.503972 | 8 |
| ENSMUSG00000021904 | Sema3g    | 0.503972 | 8 |
| ENSMUSG00000061906 | Ugt2b38   | 0.50394  | 8 |
| ENSMUSG00000006369 | Fbln1     | 0.503939 | 8 |
| ENSMUSG00000030781 | Slc5a2    | 0.503922 | 8 |
| ENSMUSG00000026574 | Dpt       | 0.503899 | 8 |
| ENSMUSG00000044349 | Snhg11    | 0.503897 | 8 |
| ENSMUSG00000041577 | Prelp     | 0.50388  | 8 |
| ENSMUSG00000026837 | Col5a1    | 0.503879 | 8 |
| ENSMUSG00000051855 | Mest      | 0.503879 | 8 |
| ENSMUSG00000020159 | Gabrp     | 0.503802 | 8 |
| ENSMUSG00000057228 | Aadat     | 0.503786 | 8 |
| ENSMUSG00000079471 | Gm7325    | 0.503747 | 8 |
| ENSMUSG00000070661 | Rnf186    | 0.50371  | 8 |
| ENSMUSG00000042367 | Gjb3      | 0.50371  | 8 |
| ENSMUSG00000025418 | Bsnd      | 0.50371  | 8 |
| ENSMUSG00000020151 | Ptprr     | 0.503691 | 8 |
| ENSMUSG00000023885 | Thbs2     | 0.503674 | 8 |
| ENSMUSG00000046959 | Slc26a1   | 0.503673 | 8 |
| ENSMUSG00000035699 | Slc51a    | 0.503655 | 8 |
| ENSMUSG00000036083 | Slc17a3   | 0.503584 | 8 |
| ENSMUSG00000039385 | Cdh6      | 0.503467 | 8 |
| ENSMUSG00000039323 | Igfbp2    | 0.503449 | 8 |
| ENSMUSG00000063632 | Sox11     | 0.50343  | 8 |
| ENSMUSG00000042379 | Esm1      | 0.503426 | 8 |
| ENSMUSG00000020123 | Avpr1a    | 0.503374 | 8 |
| ENSMUSG00000041378 | Cldn5     | 0.503302 | 8 |
| ENSMUSG00000023247 | Guca2a    | 0.503264 | 8 |
| ENSMUSG00000030116 | Mfap5     | 0.503246 | 8 |
| ENSMUSG00000040280 | Ndufa4l2  | 0.503214 | 8 |
| ENSMUSG00000021950 | Anxa8     | 0.503192 | 8 |
| ENSMUSG00000029371 | Cxcl5     | 0.503136 | 8 |
| ENSMUSG00000020062 | Slc5a8    | 0.503132 | 8 |
| ENSMUSG00000024388 | Myo7b     | 0.503113 | 8 |
| ENSMUSG00000048424 | Ranbp3l   | 0.503113 | 8 |

|                     |               |          |   |
|---------------------|---------------|----------|---|
| ENSMUSG00000028036  | Ptgfr         | 0.503095 | 8 |
| ENSMUSG00000009394  | Syn2          | 0.503076 | 8 |
| ENSMUSG00000028836  | Slc30a2       | 0.503058 | 8 |
| ENSMUSG00000005124  | Wisp1         | 0.503048 | 8 |
| ENSMUSG000000064080 | Fbln2         | 0.503021 | 8 |
| ENSMUSG000000042436 | Mfap4         | 0.502985 | 8 |
| ENSMUSG000000027202 | Slc12a1       | 0.50293  | 8 |
| ENSMUSG000000051515 | Fam181b       | 0.502833 | 8 |
| ENSMUSG000000049107 | Ntf3          | 0.502833 | 8 |
| ENSMUSG000000038530 | Rgs4          | 0.502796 | 8 |
| ENSMUSG000000021207 | Akr1c21       | 0.502782 | 8 |
| ENSMUSG000000056973 | Ces1d         | 0.502748 | 8 |
| ENSMUSG000000005980 | Dnase1        | 0.502734 | 8 |
| ENSMUSG000000031636 | Pdlim3        | 0.502722 | 8 |
| ENSMUSG000000048489 | 8430408G22Rik | 0.502594 | 8 |
| ENSMUSG000000040283 | Btnl9         | 0.502539 | 8 |
| ENSMUSG000000021091 | Serpina3n     | 0.502516 | 8 |
| ENSMUSG000000038567 | Cyp24a1       | 0.502516 | 8 |
| ENSMUSG000000028262 | Clca2         | 0.502498 | 8 |
| ENSMUSG000000039639 | Kcne1         | 0.50248  | 8 |
| ENSMUSG000000047861 | Foxi1         | 0.502443 | 8 |
| ENSMUSG000000067780 | Pi15          | 0.502424 | 8 |
| ENSMUSG000000021268 | Meg3          | 0.502407 | 8 |
| ENSMUSG000000030004 | Nat8          | 0.502406 | 8 |
| ENSMUSG000000038148 | Cldn16        | 0.502406 | 8 |
| ENSMUSG000000020566 | Atp6v1c2      | 0.502405 | 8 |
| ENSMUSG000000022598 | Psca          | 0.502387 | 8 |
| ENSMUSG000000068762 | Gstm6         | 0.502369 | 8 |
| ENSMUSG000000048905 | 4930539E08Rik | 0.502354 | 8 |
| ENSMUSG000000021765 | Fst           | 0.502263 | 8 |
| ENSMUSG000000063011 | Msln          | 0.5022   | 8 |
| ENSMUSG000000035407 | Kank4         | 0.5022   | 8 |
| ENSMUSG000000069805 | Fbp1          | 0.502189 | 8 |
| ENSMUSG000000068079 | Tcf15         | 0.502181 | 8 |
| ENSMUSG000000048096 | Lmod1         | 0.502163 | 8 |
| ENSMUSG000000054196 | Cthrc1        | 0.502163 | 8 |
| ENSMUSG000000023484 | Prph          | 0.502152 | 8 |
| ENSMUSG000000022055 | Nefl          | 0.502144 | 8 |
| ENSMUSG000000033633 | Clec18a       | 0.501901 | 8 |
| ENSMUSG000000034387 | Ssu2          | 0.501901 | 8 |
| ENSMUSG000000043144 | Aqp6          | 0.501883 | 8 |
| ENSMUSG000000036422 | Pcdh8         | 0.501883 | 8 |
| ENSMUSG000000037033 | Clca4         | 0.501864 | 8 |
| ENSMUSG000000054630 | Ugt2b5        | 0.501864 | 8 |
| ENSMUSG000000068522 | Aard          | 0.501864 | 8 |
| ENSMUSG000000038071 | Npy6r         | 0.501846 | 8 |
| ENSMUSG000000028222 | Calb1         | 0.501844 | 8 |
| ENSMUSG000000029260 | Ugt2b34       | 0.50179  | 8 |
| ENSMUSG000000018623 | Mmp7          | 0.501735 | 8 |
| ENSMUSG000000028370 | Pappa         | 0.501584 | 8 |
| ENSMUSG000000031430 | Vsig1         | 0.501584 | 8 |
| ENSMUSG000000109432 | NA            | 0.501566 | 8 |
| ENSMUSG000000042985 | Upk3b         | 0.501547 | 8 |
| ENSMUSG000000035818 | Plekhs1       | 0.501547 | 8 |
| ENSMUSG000000018830 | Myh11         | 0.501529 | 8 |
| ENSMUSG000000101089 | NA            | 0.501529 | 8 |
| ENSMUSG000000048138 | Dmrt2         | 0.50151  | 8 |
| ENSMUSG000000026166 | Ccl20         | 0.501437 | 8 |
| ENSMUSG000000068407 | Rnase12       | 0.501348 | 8 |

|                     |          |          |   |
|---------------------|----------|----------|---|
| ENSMUSG00000078302  | Foxd1    | 0.501327 | 8 |
| ENSMUSG00000005339  | Fcer1a   | 0.50129  | 8 |
| ENSMUSG00000044819  | Oxgr1    | 0.501267 | 8 |
| ENSMUSG00000078597  | Cyp4a12b | 0.501249 | 8 |
| ENSMUSG000000050635 | Sprr2f   | 0.501231 | 8 |
| ENSMUSG000000063796 | Slc22a8  | 0.50113  | 8 |
| ENSMUSG000000040600 | Eps8l3   | 0.500932 | 8 |
| ENSMUSG000000001494 | Sost     | 0.500914 | 8 |
| ENSMUSG000000003665 | Has1     | 0.500914 | 8 |
| ENSMUSG000000054034 | Tceal5   | 0.500914 | 8 |
| ENSMUSG000000026241 | Nppc     | 0.500748 | 8 |
| ENSMUSG000000043461 | Sptssb   | 0.500634 | 8 |
| ENSMUSG000000070423 | Olfr558  | 0.500634 | 8 |
| ENSMUSG000000092164 | Rerpl    | 0.500634 | 8 |
| ENSMUSG000000036198 | Arhgap36 | 0.500615 | 8 |
| ENSMUSG000000028001 | Fga      | 0.500597 | 8 |
| ENSMUSG000000108884 | NA       | 0.500579 | 8 |
| ENSMUSG000000033579 | Fa2h     | 0.500578 | 8 |
| ENSMUSG000000033860 | Fgg      | 0.500578 | 8 |
| ENSMUSG000000040856 | Dlk1     | 0.500487 | 8 |
| ENSMUSG000000029322 | Plac8    | 0.879083 | 9 |
| ENSMUSG000000060063 | Alox5ap  | 0.878703 | 9 |
| ENSMUSG000000063856 | Gpx1     | 0.833153 | 9 |
| ENSMUSG000000062825 | Actg1    | 0.830478 | 9 |
| ENSMUSG000000050335 | Lgals3   | 0.821148 | 9 |
| ENSMUSG000000075705 | Msrbl    | 0.817855 | 9 |
| ENSMUSG000000004207 | Psap     | 0.800106 | 9 |
| ENSMUSG000000059108 | Ifitm6   | 0.776933 | 9 |
| ENSMUSG000000030707 | Coro1a   | 0.761378 | 9 |
| ENSMUSG000000031584 | Gsr      | 0.748281 | 9 |
| ENSMUSG000000024659 | Anxa1    | 0.747608 | 9 |
| ENSMUSG000000056501 | Cebpb    | 0.743787 | 9 |
| ENSMUSG000000029413 | Naaa     | 0.743754 | 9 |
| ENSMUSG000000079419 | Ms4a6c   | 0.742219 | 9 |
| ENSMUSG000000024953 | Prdx5    | 0.742011 | 9 |
| ENSMUSG000000031722 | Hp       | 0.737747 | 9 |
| ENSMUSG000000030214 | Plbd1    | 0.732655 | 9 |
| ENSMUSG000000049103 | Ccr2     | 0.729789 | 9 |
| ENSMUSG000000030579 | Tyrobp   | 0.727334 | 9 |
| ENSMUSG000000008682 | Rpl10    | 0.722742 | 9 |
| ENSMUSG000000023034 | Nr4a1    | 0.721655 | 9 |
| ENSMUSG000000021242 | Npc2     | 0.718516 | 9 |
| ENSMUSG000000026385 | Dbi      | 0.717328 | 9 |
| ENSMUSG000000028367 | Txn1     | 0.717051 | 9 |
| ENSMUSG000000008540 | Mgst1    | 0.710325 | 9 |
| ENSMUSG000000028494 | Plin2    | 0.707794 | 9 |
| ENSMUSG000000020460 | Rps27a   | 0.707738 | 9 |
| ENSMUSG000000046223 | Plaur    | 0.706895 | 9 |
| ENSMUSG000000025283 | Sat1     | 0.706175 | 9 |
| ENSMUSG000000001175 | Calm1    | 0.701584 | 9 |
| ENSMUSG000000026536 | Mnda     | 0.699608 | 9 |
| ENSMUSG000000032294 | Pkm      | 0.696947 | 9 |
| ENSMUSG000000073412 | Lst1     | 0.696762 | 9 |
| ENSMUSG000000038811 | Gngt2    | 0.688037 | 9 |
| ENSMUSG000000078783 | Gm9733   | 0.684316 | 9 |
| ENSMUSG000000030142 | Clec4e   | 0.680468 | 9 |
| ENSMUSG000000028657 | Ppt1     | 0.673042 | 9 |
| ENSMUSG000000030717 | Nupr1    | 0.669978 | 9 |
| ENSMUSG000000054203 | Ifi205   | 0.668267 | 9 |

|                    |          |          |   |
|--------------------|----------|----------|---|
| ENSMUSG00000035493 | Tgfb1    | 0.66775  | 9 |
| ENSMUSG00000011752 | Pgam1    | 0.665931 | 9 |
| ENSMUSG00000006519 | Cyba     | 0.663414 | 9 |
| ENSMUSG00000040212 | Emp3     | 0.660309 | 9 |
| ENSMUSG00000039109 | F13a1    | 0.656504 | 9 |
| ENSMUSG00000072596 | Ear2     | 0.652058 | 9 |
| ENSMUSG00000014846 | Tppp3    | 0.650885 | 9 |
| ENSMUSG00000000682 | Cd52     | 0.647719 | 9 |
| ENSMUSG00000079017 | Ifi2712a | 0.64629  | 9 |
| ENSMUSG00000020077 | Srgn     | 0.645286 | 9 |
| ENSMUSG00000040809 | Chi3l3   | 0.644755 | 9 |
| ENSMUSG00000033161 | Atp1a1   | 0.641111 | 9 |
| ENSMUSG00000060509 | Xcr1     | 0.633766 | 9 |
| ENSMUSG00000006589 | Aprt     | 0.630774 | 9 |
| ENSMUSG00000030413 | Pglyrp1  | 0.629462 | 9 |
| ENSMUSG00000025498 | Irf7     | 0.62453  | 9 |
| ENSMUSG00000031444 | F10      | 0.620873 | 9 |
| ENSMUSG00000052534 | Pbx1     | 0.616879 | 9 |
| ENSMUSG00000026193 | Fn1      | 0.616586 | 9 |
| ENSMUSG0000003032  | Klf4     | 0.614436 | 9 |
| ENSMUSG00000040152 | Thbs1    | 0.614371 | 9 |
| ENSMUSG00000020681 | Ace      | 0.613775 | 9 |
| ENSMUSG00000022456 | Sep-03   | 0.599433 | 9 |
| ENSMUSG00000024164 | C3       | 0.598405 | 9 |
| ENSMUSG00000022586 | Ly6i     | 0.597832 | 9 |
| ENSMUSG00000030695 | Aldoa    | 0.59173  | 9 |
| ENSMUSG00000024011 | Pi16     | 0.584615 | 9 |
| ENSMUSG00000060600 | Eno3     | 0.584246 | 9 |
| ENSMUSG00000058135 | Gstm1    | 0.579613 | 9 |
| ENSMUSG00000022014 | Epsti1   | 0.579149 | 9 |
| ENSMUSG00000005947 | Itgae    | 0.577061 | 9 |
| ENSMUSG00000007872 | Id3      | 0.575124 | 9 |
| ENSMUSG00000069515 | Lyz1     | 0.573038 | 9 |
| ENSMUSG00000022528 | Hes1     | 0.565706 | 9 |
| ENSMUSG00000062515 | Fabp4    | 0.558119 | 9 |
| ENSMUSG00000048498 | Cd300e   | 0.557987 | 9 |
| ENSMUSG00000046727 | Cystm1   | 0.552336 | 9 |
| ENSMUSG00000021759 | Ppap2a   | 0.551784 | 9 |
| ENSMUSG00000022512 | Cldn1    | 0.546719 | 9 |
| ENSMUSG00000074743 | Thbd     | 0.542005 | 9 |
| ENSMUSG00000057729 | Prtn3    | 0.540968 | 9 |
| ENSMUSG00000042745 | Id1      | 0.529872 | 9 |
| ENSMUSG00000029648 | Flt1     | 0.528138 | 9 |
| ENSMUSG00000040564 | Apoc1    | 0.522855 | 9 |
| ENSMUSG00000060962 | Dmkn     | 0.522609 | 9 |
| ENSMUSG00000053475 | Tnfaip6  | 0.519935 | 9 |
| ENSMUSG00000030200 | Bcl2l14  | 0.516115 | 9 |
| ENSMUSG00000040026 | Saa3     | 0.506562 | 9 |
| ENSMUSG00000034783 | Cd207    | 0.504692 | 9 |
| ENSMUSG00000032494 | Tdgf1    | 0.50185  | 9 |
| ENSMUSG00000062393 | Dgkk     | 0.500597 | 9 |
| ENSMUSG00000019890 | Nts      | 0.50014  | 9 |
